# Supplementary material for: Transcriptome profiling with focus on potential key genes for wing development and evolution in Megaloprepus caerulatus, the damselfly species with the world's largest wings
Source: PLOS journal article supplement (doi:10.1371/journal.pone.0189898), 2018-01-12
Supplement: S1 (10.1371/journal.pone.0189898.s001) [file journal.pone.0189898.s001]

**S1A Table.** Summary of genes involved in pigmentation of insect wings and other body parts identified within the *M. caerulatus* transcriptome. For each gene the corresponding Unigene ID, FPKM values and their one of their main functions are shown.

| gene                             | Unigene ID | read count | FPKM   | Main function                                                                                                                          |
|----------------------------------|------------|------------|--------|----------------------------------------------------------------------------------------------------------------------------------------|
| Aristaless ( <i>al</i> )         | TR167515   | 8          | 0.77   | <i>Homeobox</i> protein, precedes <i>wg</i> expression - wing pattern evolution                                                        |
| Black ( <i>b</i> )               | TR93729    | 12         | 0.65   | Cysteine sulfinic acid decarboxylase, melanin pathway                                                                                  |
| Ebony ( <i>e</i> )               | TR1248     | 35         | 1.40   | Inhibits melanization in non-black wing regions                                                                                        |
| Tan ( <i>t</i> )                 | TR192472   | 44         | 1.81   | Melanin pathway                                                                                                                        |
| Yellow ( <i>yellow</i> )         | TR182547   | 2,205      | 61.44  | Melanin pathway                                                                                                                        |
|                                  | TR183295   | 2,866      | 71.30  |                                                                                                                                        |
| Ecdysone Receptor ( <i>EcR</i> ) | TR215139   | 1,262      | 41.31  | Ligand-dependent transcription factor, steroid receptor super family                                                                   |
| Araucan ( <i>ara</i> )           | TR162214   | 32         | 2.24   | Transcription factor, imaginal disc-derived and wing vein specification                                                                |
| Henna ( <i>Hn</i> )              | TR231264   | 874        | 24.74  | Pteridine pathway - regulates phenylalanine                                                                                            |
| bric a brac 1 ( <i>bab</i> )     | TR165906   | 61         | 3.00   | Axis patterning, involved in female specific pigmentation in <i>Drosophila</i> sp.                                                     |
| bric a brac 2 ( <i>bab</i> )     | TR206843   | 149        | 8.67   |                                                                                                                                        |
| Dor ( <i>dor</i> )               | TR165868   | 1,574      | 28.41  | Pigment granule gene, vacuolar protein sorting-associated protein 18 homolog                                                           |
| Pale protein ( <i>ple</i> )      | TR106565   | 217        | 4.18   | Tyrosine 3-monooxygenase, melanin pathway                                                                                              |
|                                  | TR158701   | 32,165     | 606.37 |                                                                                                                                        |
|                                  | TR200723   | 10,582     | 181.28 |                                                                                                                                        |
| Phenoloxidase 2 ( <i>PO</i> )    | TR201540   | 441        | 8.99   | Melanization, final polymerization cuticular pigments, immune response                                                                 |
|                                  | TR177287   | 1,035      | 13.73  |                                                                                                                                        |
| Rosy ( <i>ry</i> )               | TR202403   | 136        | 3.21   | Xanthine dehydrogenase, pteridine pathway                                                                                              |
|                                  | TR203851   | 93         | 4.56   |                                                                                                                                        |
| White ( <i>w</i> )               | TR217941   | 774        | 23.58  | Ommochrome pathway - ommochrome precursor transporter gene                                                                             |
| Scarlet ( <i>st</i> )            | TR182410   | 189        | 4.21   |                                                                                                                                        |
|                                  | TR16501    | 89         | 4.20   | Pigment granule gene, organ pigmentation                                                                                               |
| Mal ( <i>mal</i> )               | TR151410   | 97         | 2.23   | Molybdenum cofactor sulfurase, cofactor for synthetic processes: essential for xanthine dehydrogenase (XDH) and aldehyde oxidase (ADO) |
|                                  | TR151410   | 35         | 1.51   |                                                                                                                                        |
| Prat ( <i>Prat</i> )             | TR15147    | 21         | 1.54   | Amidophosphoribosyltransferase, purine metabolism, pteridine pathway                                                                   |
| Vermillion ( <i>v</i> )          | TR155117   | 845        | 30.07  | Ommochrome pathway, ommochrome enzyme gene, brown eye pigment, tryptophan 2,3-dioxygenase                                              |

**S1B Table.** Genes of the wing-patterning gene network found in *M. caerulatus* with their corresponding Unigene ID, FPKM values and some of their main functions.

| gene                                                          | Unigene ID | read count | FPKM  | Main function                                                                                                                                                               |
|---------------------------------------------------------------|------------|------------|-------|-----------------------------------------------------------------------------------------------------------------------------------------------------------------------------|
| Hedgehog ( <i>Hh</i> )                                        | TR219975   | 265        | 10.63 | Short range signaling molecule, embryonic segmentation, segment polarity                                                                                                    |
| Decapentaplegic ( <i>Dpp</i> )                                | TR23365    | 19         | 1.98  | Long range signaling molecule; embryonic dorsal/ventral patterning; boundaries between appendage compartments                                                               |
|                                                               | TR199155   | 67         | 2.56  |                                                                                                                                                                             |
| Optomotor-blind ( <i>bi</i> [ <i>Omb</i> ])                   | TR174327   | 226        | 20.03 | Transcription factor, wing differentiation and wing formation                                                                                                               |
| Spalt major ( <i>salm</i> )                                   | TR119349   | 79         | 2.93  | Transcription factor, <i>Dpp</i> signaling, controls vein-specific expression of knirps and iroquois gene complex - controls position of the wing veins                     |
|                                                               | TR211792   | 132        | 6.63  |                                                                                                                                                                             |
| Serrate ( <i>Ser</i> )                                        | TR178981   | 1,344      | 28.57 | Short range signaling molecule, notch ligand; initiation of wing margin (dorsal-ventral) by controlling cell proliferation                                                  |
| Cut ( <i>cut</i> )                                            | TR148092   | 98         | 3.88  | Selector gene (homeodomain transcription factor), wing and follicle cell morphogenesis                                                                                      |
| Achaete / Scute ( <i>ac/sc</i> )                              | TR159427   | 610        | 20.65 | Transcription factor, involved in the determination of the neural fate; (scute alone responsible for sex determination)                                                     |
| Wingless ( <i>wg</i> )                                        | TR153309   | 159        | 9.53  | Long range signaling molecule, segment polarity gene, wing morphogenesis, mediating dorso-ventral compartment boundary                                                      |
| Scalloped ( <i>sd</i> )                                       | TR191046   | 573        | 19.87 | Selector gene (homeodomain transcription factor), downstream effector molecule (wingless pathway)                                                                           |
| Blistered [Serum Response Factor] ( <i>bs</i> [ <i>srf</i> ]) | TR175967   | 390        | 15.56 | Selector gene (homeodomain transcription factor), vein / intervein formation                                                                                                |
|                                                               | TR175378   | 67         | 2.22  |                                                                                                                                                                             |
| Spitz ( <i>spi</i> )                                          | TR160328   | 60         | 2.67  | Ligand for the epidermal growth factor receptor, differentiation of ommatidial cell types                                                                                   |
| Ultrabithorax ( <i>Ubx</i> )                                  | TR214266   | 21         | 1.88  | Selector gene ( <i>Hox</i> gene), 'correct' dorsal and ventral appendage patterning in the third thoracic segment                                                           |
| Sex combs reduced ( <i>Scr</i> )                              | TR157439   | 65         | 4.37  | Selector gene ( <i>Hox</i> gene), first thoracic segment development                                                                                                        |
| Extradenticle ( <i>exd</i> )                                  | TR187890   | 498        | 31.83 | Transcription factor, interacts with homeotic proteins for specificity of homeotic protein binding to DNA - cofactor of <i>Ubx</i> , transformation of segmental identities |
