# Supplementary material for: Transcriptome profiling with focus on potential key genes for wing development and evolution in Megaloprepus caerulatus, the damselfly species with the world's largest wings
Source: PLoS One. 2018 Jan 12;13(1):e0189898. doi: 10.1371/journal.pone.0189898 (PMC5766104; doi:10.1371/journal.pone.0189898)
Supplement: S1 File — (FASTA) [file pone.0189898.s004.fasta]

>TR121213|c1_g1_i1|m.8645 9inseheat shock protein 90 os=centroptilum triangulifer pe=2 sv=1|GO:0005524 GO:0051082 GO:0006457 GO:0006950
MPEEVQMAGEGEAETFAFQAEIAQLMSLIINTFYSNKEIFLRELISNSSDALDKIRYESLTDPTKLESGKELYIKIVPNKNDRTLTLIDTGIGMTKADLV
NNLGTIAKS
>TR147746|c0_g1_i3|m.11743 | activator of 90 kda heat shock protein atpase homolog 1|GO:0001671 GO:0051087
MAKWGEGDPRWIVEERPDATNVNNWHWTEKNATPWSIDKIKELFKGLTFEGEDHRCKIYDVDHCEGEATVNNRKGKLIFFYEWDIVLKWRAVLIGQEEEE
EKEGDVDKSKSKKTVTKGTIHIPNLSEENQVEEVDVLVSVKESGMDYEKAQKLLNGEGRRKIREQLALYLSLLKEGEFHFLCKLKK
>TR156565|c4_g1_i4|m.19955 | 97 kda heat shock protein isoform x2
MLTLKKSCFLNSFSFLFREMEVFNSNHAVPYTKMLTFYRNEPFSLKALYKGNIPYPDHYIGEYFIKDVKPTPEGESPKVKVKVRVNIHGIFTVSSASLVE
KKDGNAGDDSIEEQQNQHNAGETEPMETNPSTAPNEGNTKQQESPESPRQNHNANVNDNQKGEEGETEATDKKDGKKKKVLVKTIELPIEVFTHGYNQSE
INNYTEQECKMVSQDKMEKERIDARNALEEYLYDLRGKLSGGALTSFVPESDCSSILRQLDDLENWLYEEGEDCNRQVYVDKLNVLKSSSDPIYHRFTEH
DERRGVIENFTRSIIRARKAVEMYQGGDERFNHLTEAEINTVSQAVNEKQSWLDEKQSNLASCPLFRDPPTKVADIRKELQAFENTVNAVINKPKPKATP
PPSKEPAKNEGDDSKPPEENQQQGSTEDKMDVE
>TR157232|c0_g1_i1|m.20840 ambvaheat shock protein 90 os=amblyomma variegatum pe=2 sv=1|GO:0005524 GO:0051082 GO:0006457 GO:0006950
MSEQEVDTFAFQAEINQLLSLIINTFYSNKEIFLRELISNASDALDKIRYMSLTDKSVLEAEPELKINIIPDKENKTLTIEDTGIGMTKVDLIKNLGTIA
RSGTKGFMEALQSGADISMIGQFG
>TR157232|c1_g1_i1|m.20842 | heat shock protein 83|GO:0005524 GO:0051082 GO:0006457 GO:0006950
SLEYIKNMNLNDKKNSDIIGQFGVGFYPAYLVADRVTVTSKHNDDEQYIWESSAGGEFTVKKDRSGETLKRGTRIVLHMKEDQLDYLEIKKIKEIVKKHS
EFINYPISLWVTQEKDKEVSDDEEEEKEGESDKPKVEDVTEESEKKEKKKKTIKEVTHEWELLNKQKPLWTRNPKDVTKEEYAAFYKSLTNDWEEHLSVK
HFSVEGQLEFTALIFVPKRAPFDLFESKKKQNNIKLYVRRVFIMDDCKEIIPEYLNFVKGIVDSEDLPLNISREMLQQNKILKVIRKNLVKKCMDLFTEL
QENKEDFKKFYEAFGKNLKLGVHEDTQNRTKLAEFLLYHSSKSGEEMTSFKDYITRMKEGQKDIYYITGESKKQLENSPFLEKLKKKGLEVLYMTEPIDE
YAMQQLKEFDGKKFVCITKEGLNLEDTEDEKKKKEELKAQFEPLCKTVKEILGDKVEKVVLSDRIVHSPCVLVTGEHGWSANMERIMKAQALRDASMSSY
MTSKKTLELNPSHPIVAELKKKADADKSDKTVKDLVWLIFETALLGSGFSLEDPNTFAQRIHRMIKLGLSIEDDHEEEAAQVDEDLPPLETDEGSKMEEV
D
>TR171697|c1_g1_i10|m.37222 | heat shock protein 83|GO:0005524 GO:0051082 GO:0006457 GO:0006950
MPEDVQMQSDAEVETFAFQAEIAQLMSLIINTFYSNKEIFLRELISNSSDALDKIRYESLTDPSKLENGKELFIKIIPNKNDRTLTIIDTGIGMTKADLV
NNLGTIAKSGTKAFMEALQAGADISMIGQFGVGFYSAYLVADKVIVTSKHNDDEQYTWESSAGGSFTVRPDAGEPLGRGTKIVLHIKEDQAEFLEERKIK
DVVKKHSQFIGYPIKLMVEKERDKEVSDDEEEEKKEEEEEKEDDKKPKIEDVEDDEEEGGDKKGKKKKTVKEKYTEDEELNKTKPIWTRNPDDISQEEYG
EFYKSLTNDWEDHLAVKHFSVEGQLEFRALLFVPRRAPFDLFDNKKRKNNIKLYVRRVFIMDNCEDLIPEYLNFIKGVVDSEDLPLNISREMLQQNKILK
VIRKNLVKKCLELFEELAEDKENYRKCYEQFGKNLKLGIHEDSQNRKKLSELLRYHTSASGDEACALKDYVGRMKEGQQSIYYITGESREQVANSAFVER
VKKRGFEVVYMTEPIDEYVVQQLKEYDGKTLVSVTKEGLELPEDEEEKKKREEDRTRLEALCKVMKDILDKKVEKVVVSNRLVSSPCCIVTSQYGWTANM
ERIMKAQALRDASTLGYMAAKKHLEINPDHPVIESLRKKVEADKHDKAVKDLVLLLFETALLASGFSLEDPQVHAARIHRMIKLGLGIDEDDAEEEMTAG
ASDEKKDEEMPPLEGDAEDASRMEEVD
>TR171697|c1_g1_i12|m.37224 laostheat shock protein 90 os=laodelphax striatella pe=2 sv=1|GO:0005524 GO:0051082 GO:0006457 GO:0006950
MSRVDYLVMLFNIHCRFSNIHCFSSYFRVIVTSKHNDDEQYTWESSAGGSFTVRPDAGEPLGRGTKIVLHIKEDQAEFLEERKIKDVVKKHSQFIGYPIK
LMVEKERDKEVSDDEEEEKKEEEEEKEDDKKPKIEDVEDDEEEGGDKKGKKKKTVKEKYTEDEELNKTKPIWTRNPDDISQEEYGEFYKSLTNDWEDHLA
VKHFSVEGQLEFRALLFVPRRAPFDLFDNKKRKNNIKLYVRRVFIMDNCEDLIPEYLNFIKGVVDSEDLPLNISREMLQQNKILKVNIIFLISFCDLMTY
EKCSY
>TR171697|c1_g1_i3|m.37212 | heat shock protein 83|GO:0005524 GO:0051082 GO:0006457 GO:0006950
MPEDVQMQSDAEVETFAFQAEIAQLMSLIINTFYSNKEIFLRELISNSSDALDKIRYESLTDPSKLENGKELFIKIIPNKNDRTLTIIDTGIGMTKADLV
NNLGTIAKSGTKAFMEALQAGADISMIGQFGVGFYSAYLVADKVIVTSKHNDDEQYTWESSAGGSFTVRPDAGEPLGRGTKIVLHIKEDQAEFLEERKIK
DVVKKHSQFIGYPIKLMVEKERDKEVSDDEEEEKKEEEEEKEDDKKPKIEDVEDDEEEGGDKKGKKKKTVKEKYTEDEELNKTKPIWTRNPDDISQEEYG
EFYKSLTNDWEDHLAVKHFSVEGQLEFRALLFVPRRAPFDLFDNKKRKNNIKLYVRRVFIMDNCEDLIPEYLNFIKGVVDSEDLPLNISREMLQQNKILK
VIRKNLVKKCLELFEELAEDKENYRKCYEQFGKNLKLGIHEDSQNRKKLSELLRYHTSASGDEACALKDYVGRMKEGQQSIYYITGESREQVANSAFVER
VKKRGFEVVYMTEPIDEYVVQQLKEYDGKTLVSVTKEGLELPEDEEEKKKREEDRTRLEALCKVMKDILDKKVEKVVVSNRLVSSPCCIVTSQYGWTANM
ERIMKAQALRDASTLGYMAAKKHLEINPDHPVIESLRKKVEADKHDKAVKDLVLLLFETALLASGFSLEDPQVHAARIHRMIKLGLGIDEDDAEEEMTAG
ASDEKKDEEMPPLEGDAEDASRMEEVD
>TR171697|c1_g1_i9|m.37220 laostheat shock protein 90 os=laodelphax striatella pe=2 sv=1|GO:0005524 GO:0051082 GO:0006457 GO:0006950
MSRVDYLVMLFNIHCRFSNIHCFSSYFRVIVTSKHNDDEQYTWESSAGGSFTVRPDAGEPLGRGTKIVLHIKEDQAEFLEERKIKDVVKKHSQFIGYPIK
LMVEKERDKEVSDDEEEEKKEEEEEKEDDKKPKIEDVEDDEEEGGDKKGKKKKTVKEKYTEDEELNKTKPIWTRNPDDISQEEYGEFYKSLTNDWEDHLA
VKHFSVEGQLEFRALLFVPRRAPFDLFDNKKRKNNIKLYVRRVFIMDNCEDLIPEYLNFIKGVVDSEDLPLNISREMLQQNKILKVNIIFLISFCDLMTY
EKCSY
>TR181521|c5_g1_i7|m.45555 9hemi heat shock 70 kda protein cognate 4 os=panstrongylus megistus pe=2 sv=1|GO:0005524
MAKAPAVGIDLGTTYSCVGVFQHGKVEIIANDQGNRTTPSYVAFTDTERLIGDAAKNQVAMNPNNTVFDAKRLIGRRFEDASVQSDMKHWPFTVVSDGGK
PKIQIQYKGETKTFFPEEISSMVLTKMKETAEAYLGKTVSNAVVTVPAYFNDSQRQATKDSGAIAGLNVLRIINEPTAAAIAYGLDKKGSGERNVLIFDL
GGGTFDVSILTIEDGIFEVKSTAGDTHLGGEDFDNRMVNHFVQEFKRKYKKDLTPNKRAVRRLRTACERAKRTLSSSTQASIEIDSLFEGIDFYTSITRA
RFEELNADLFRSTLEPVEKSLRDAKMDKSQIHDIVLVGGSTRIPKIQKLLQDFFNGKELNKSINPDEAVAYGAAVQAAILHGDKSEAVQDLLLLDVTPLS
LGIETAGGVMTALIKRNTTIPTKQTQTFTTYSDNQPGVLIQVYEGERTMTKDNNLLGKFELTGIPPAPRGVPQIEVTFDSDANGILNVTAVDKSTGKENK
ITITNDKGRLSKEEIERMVNDAERYKAEDEKQRQQVQAKNSLESYCFNMKSTAEDEKLKDKLSEADKKTILDKCDEIIKWLDANQLAEKEEYEHKQKEVE
QVCNPIITKLYQSGAGGMPGGMPGGMPGGMPPGAGGSAPGSGPTIEEVD
>TR19373|c0_g1_i1|m.1725 9crusheat shock protein 70 os=moina macrocopa gn=hsp70 pe=2 sv=1|GO:0005524
QRQATKDAGTISGLNVLRIINEPTAAAIAYGLDKKVKGERHVLIFDLGGGTFDVSILSIEEGIFEVKSTAGDTHLGGEDFDNRMVNHFVQEFSRKHKKDL
STNPRAIRRLRTACERAKRTLSSSTQASIEIDSLYEGIDFYTSITRARFEELCSDLFRGTLEPVEKAIRDAKMDKSQIHEIVLVGGSTRIPKVQKLLQDF
FNGKELNKSINPDEAVAYGAAVQAAILHGDKSEAVQDLLLLDVAPLSLGIETAGGVMTSLIKRNTTIPTKQTQIFTTYADNQPGVLIQVFEGERAMTKDN
NLLGKFELTGIPPAPRGVPQIEVTFDI
>TR199380|c0_g2_i1|m.57256 copfoheat shock protein os=coptotermes formosanus pe=2 sv=1
MSLLPFLLDEVDRPPRLFDQDFGLGLRFNDLYQPVPNLVKLGYYRPWRHISGQQSGMSSVQADTEGFQVMLDVQQFSPNEISVKTVENCVVVEGKHEEKP
DEHGYVSRHFIRRYVLPDGIRPETITSSLSSDGVLSISAPKALPMPAANERMVPITQTGAPAVKQQIETASSPAAEGDARKEQ
>TR200284|c1_g1_i1|m.57714 | heat shock 70 kda protein cognate 3 isoform x2|GO:0004655 GO:0046872 GO:0015994 GO:0033014
MSFSVDPKHNLHSSYFHPVFRNWQNANVGIAAHNLMYPVFIVDDDEAITEINSMPGVSRYGINKLKDALKPLVDLGLVAVLLFGVPSQLPKVISFPNCLL
YNLARKH
>TR200515|c5_g2_i8|m.58121 | heat shock factor isoform x2
MFMGSVDPAVVSPVPPSKMDKVKVQAGSRPSRNGTKPSSSLVKKAPHSQNSCKTKRATTVSKRNSTNKTKVEAMDLYPEIHLEEGNAALGDEEANLLKSL
ASSGVNVNDLNVNVDSSVIPEDKKTEEKNDSNMALACTSGSNGERQKTSGNNIREELDMHIDTMQSELDILKDMFMKGNVSSSGGSPGTEGDLMGAVGGL
EGCCLDASALLGLFSSEDPLSFGINSLPGSSEGLNENTKENPEFSVSGNEITAYNPTLLDLVEDDDDDSQILNWYDEASSMSKETSSDATPALTSSSGSR
GKTSISGNTMGTKGKGAGKVNVTSVNSPKNTNPSRRKTK
>TR200749|c0_g1_i5|m.58505 machi 60 kda heat shock protein os=maconellicoccus hirsutus pe=2 sv=1|GO:0005524
MALRMPCMQIAKNAGIDGSVVVSKVEEAGGEQGYDALNDQYVNMIEMGIIDPTKVVRTALTDAAGVASLLTTAEAVVTEIPKEEKMPAMGGGMGGMGGMD
MM
>TR200749|c0_g1_i6|m.58506 triif 60 kda heat shock protein mitochondrial-like isoform 1 os=triatoma infestans pe=2 sv=1|GO:0005737 GO:0005524 GO:0042026
PKCKCCRIMLTQGHQHYDEHHPEYPLVYFVAVCFTSATVFPVGALSVDHVVSSSPGEMYRLPSVLRLTAARHISPSLIRHLAKDVRFGPDVRALMLQGVD
ILADAVAVTMGPKGRNVILEQSWGSPKITKDGVTVAKGIELKDKFQNVGAKLVQDVANNTNEEAGDGTTTATVLARAIAREGFDKISKGANPIEIRRGVM
MAVDAVIEHLKTLSKTVTTPEEIAQVATISANGDKQIGDLISAAMKKVGKEGVITVKDGKTLHDELEVIEGMKFDRGYISPYFINTAKGAKVEFQDCLVI
FSEKKISSVQSIIPALELANAQRKPLVIVAEDIDGEALSTLVVNRLKIGLQVAAVKAPGFGDNRKNTLTDMAIATGGIVFGDEANTLKLEDVQLADLGQV
GEVTITKDDTLFLKGKGKKEDIDRRADQIRDQIDDTTSEYEKEKLQERLARLASGVALLKVGGSSEVEVNEKKDRVNDALNATRAAVEEGIVPGGGTALI
RCIPALAKLKPSNEDQKTGINIITMALRMPCMQIAKNAGIDGSVVVSKVEEAGGEQGYDALNDQYVNMIEMGIIDPTKVSTADIWDVLTMGLLAEHQNF
>TR210603|c0_g1_i1|m.69973 | heat shock 70 kda protein cognate 3- partial
MVLVKMREIAESYSGKKIKNAIVTVPAYFDNSQRQSTKDAGIIAGLNVVRVLNEPTAAAIAYGLDQKEEKNSLVFDLGGGTFDVSILTIDEGVFEIIGTN
G
>TR216590|c1_g2_i4|m.76023 | heat shock protein 75 mitochondrial|GO:0005524 GO:0051082 GO:0006457 GO:0006950
VMIMAASIKMQRVVILGKNIVKLGRCVHLDSKLRPLSNLKYTQGWAHRYRHIRPLSTQSEAEPKDYHSIIKDTEKGTGEADRREFQAETRMLLDIVAKSL
YSDKEVFIRELISNASDALEKQRYDWLTADPSGGTQQRPLEIHVATDKINRYFTIQDTGIGMTKEEMIDHLGTIARSGSKAFLEQLKAKSGGVPPSDAST
IIGQFGVGFYSSFMVAEKVEVYSRKGDEPGYRWVSDGSGTYEIQQAEGVQPGTKIVVHLKADCREYSDDDTIKGVIKKYSNFVGSPIFVNGKQVNVIQPL
WLMDPKDVKQEMHDEFYRFVSNAYDRPRFSLHYTTDAPLSIRALLYIPEGKPGLFEMSRDTDVGVALYSRKVLIKSRAENILPKWLRFVKGVVDSEDIPL
NLSRELLQNSALIRKLKTVLTNRLLRFLHDKSQKEADSYDAFLKDYGLFLKEGIVTSAEQLEKEEISKLLRFESSLKPEGERVSLPQYCGRLKEGQRDIF
YLAAPSRALAEASPYYEALRQKDVEVLFCYEPYDELVLMQLREFDRHPLTSIEKEMRQDKEKEDLTDLGPDSLARSEIESLTSWLKKSLTGKVHSVTVTR
RLDSHPCVITVEEMAAARHFIRTQSQQLTEESRFALLQPRLEINTSHPIIKKLNKLSSSNPKLADLVAHQLFSNAMVMAGLVEDPRPLLTGMNELLQLAL
EKH
>TR216590|c1_g2_i5|m.76024 | heat shock protein 75 mitochondrial|GO:0005524 GO:0051082 GO:0006457 GO:0006950
VMIMAASIKMQRVVILGKNIVKLGRCVHLDSKLRPLSNLKYTQGWAHRYRHIRPLSTQSEAEPKDYHSIIKDTEKGTGEADRREFQAETRMLLDIVAKSL
YSDKEVFIRELISNASDALEKQRYDWLTADPSGGTQQRPLEIHVATDKINRYFTIQDTGIGMTKEEMIDHLGTIARSGSKAFLEQLKAKSGGVPPSDAST
IIGQFGVGFYSSFMVAEKVEVYSRKGDEPGYRWVSDGSGTYEIQQAEGVQPGTKIVVHLKADCREYSDDDTIKGVIKKYSNFVGSPIFVNGKQVNVIQPL
WLMDPKDVKQEMHDEFYRFVSNAYDRPRFSLHYTTDAPLSIRALLYIPEGKPGLFEMSRDTDVGVALYSRKVLIKSRAENILPKWLRFVKGVVDSEDIPL
NLSRELLQNSALIRKLKTVLTNRLLRFLHDKSQKEADSYDAFLKDYGLFLKEGIVTSAEQLEKEEISKLLRFESSLKPEGERVSLPQYCGRLKEGQRDIF
YLAAPR
>TR216940|c3_g4_i3|m.76310 schgrheat shock protein os=schistocerca gregaria pe=2 sv=1
MKINRRNLIYIEHFSPFQMSRYRMSLRPFFGNHWVTSRGPYQIFDQNFGLGMDMDDLFQPILPFPTLNYDRPWRHLTGSDSGTSSVAMGKDGFKVMMDVQ
HFKPEEITVKHVEDSVVVEGKHEETEDEHGYVSRHFVRRYVLPKGVDPQALNSSLSSDGVLSITAPQVSSVRILEGYLDFL
>TR232249|c0_g1_i2|m.88708 copfoheat shock protein os=coptotermes formosanus pe=2 sv=1
MAYIAYSLADPLDSIHRSLGQIERAMSVAAPLARHDPSVAYYRPWRHLSGQNSGMSNVSLDKDGFQVKLDVQQFSPEEISVKTVDNHIVVEGKHEEKEDE
HGFVYRHFVRRYAIPEGVQAEAIKSSLSTDGVLTICAPKVQAIKGANERVVNIVQTGVPVKKSVEGSEKKAVEEN
>TR232249|c0_g1_i4|m.88709 pluxysmall heat shock protein os=plutella xylostella pe=2 sv=1
MAYIAYSLADPLDSIHRSLGQIERAMSVAAPLARHDPSVAYYRPWRHLSGQNSGMSNVSLDKDGFQVKLDVQQFSPEEISVKTVDNHIVVEGKHEEKEDE
HGFVYRHFVRRYAIPEGVQAEAIKSSLSTDGVLTICAPKVCSRTSAKISICGVQAMY
>TR236496|c0_g1_i1|m.93035 | heat shock protein 75 mitochondrial-like|GO:0005524 GO:0051082 GO:0006457 GO:0006950
TYEISEAEGVQVGTKIVLEISDTNIEFCHKEMIEKIIKRYSNFVGFPIKLNAAVINTVKPLWTMAKKDISEKDHKEFYQFIAHAYDEPTFNLYYATDSPL
NIRSLFYVGTTHNEKFGMGRLEPGVNLFCRKVLIQSKAKGLLPDWLRFIKGVVDSEDIPLNLSREHL
>TR159791|c0_g1_i1|m.25153 | cell wall integrity and stress response component 3-like
NTAPGGEDSDKKVLPIQDDPMGENFFPSRRQPTTVTTPPTPTTSGQFVTQIMVSTMKKNQTKDSVQQPPVSTPGSNTLDRRPVTTTVSTSHTVTHRKSSP
TLATIIRTTPMPSTVGSTAFSSITPPQPPPSTSVKWKIAIPPNRQVTRFPPRKPATTTTTTASPENSNSETTKKESKPSSSGSSNSKPSVGGSTKPYTSI
ASSRQPTSTITRVTTTPQPRVMITSRATVAIPSHSSFIPTTRPPTTTTVRQLVRMTTPKPSVATPHTTTLAPTKLKPTTSTTPEPKKESPATVQEKKPLP
VEKEVVKPPVATEITKADVTLKAESTTASPPSSSPRPRRPSNKRKKNKNRRRRPAKKPVITTAAPSSGTELEVKESPQEDDAGNVASPLSTRIYNFIARE
VMPSMSVGLLGLVVTAGLAGYFLLPTLGLQRRSDVANGGYSGGGSYGFGVAGQDDDSGIVQTIFQNVMASVSNGEKEFERGPRRRRNVLATDEAENEIDA
NLKVKERDELWQQTNPTEITSTYSPDVMTSSPSENPDPTTSEIDSQKDTSTNLPDTKDQMLTTTEGPKTNYNSTNAMTPTYDWEGEYGEYPMTLTGILRR
IAEFKLQLGVSLLRATTDVIARYLQDVQQRLRDSDKQDWMRNLESTISRIRRNINPPQTEPEENDSIPHPRSRFSRHHRSKRHG
>TR161325|c2_g1_i1|m.27302 | stress-induced-phosphoprotein 1|GO:0005515
MEGAEQEKIAGNAAYKKRDFETALACYEKATALNPNDMTFYTNIAAVHFEKKDYKKCIEICEKAIEIGRENRADFKLIARAFTRIGNAYKKLEDWQNAKV
YYEKSMSEHRTPEIKTLLSEAERQFKEMERKAYIDPEKAEQEKEIGNSLFKKGDYATAMKHYTEAIKRNPDDPKIYSNRAACYTKLAAFDLGLKDCDKCV
ELDPKFIKGWIRKGKILQGMQQFTKALAAYQKALDIDTTNAEALDGYRTCSVAANSNPEEVRKRAMSDPDIQAILRDPAMRLILEQMQNDPKALQDHLKN
SDIAAKIQKLLESGLIAIH
>TR163768|c0_g1_i1|m.29960 | stress-70 mitochondrial-like
LGSRNFNVLKKANISMGRTSFNGFTKPQSHPQRRNYAITSDVIGIDLGTTNSCVAVMEGSEPRVLENSEGMRTTPSIVGFTAEGERLVGLPAKRQAQTNP
QNTVYATKRLIGRQYDDAEVAKEQSMVPFKIVRGPNNQAYVEAQGKSYSPSEVGAFVLIKMKETAESHLGKKINHAVVTVPAYFNDSQRQATKDAGKIAG
LTVERIINEPTAAALAYGLKKTEDGKVVAVYDLGGGTFDISILEISNGVFEVKATNGDTFLGGEDFDQVILNHIVEEYKKTDGVDLKKDKMALQRLREAA
