# Supplementary material for: Transcriptome profiling with focus on potential key genes for wing development and evolution in Megaloprepus caerulatus, the damselfly species with the world's largest wings
Source: PLoS One. 2018 Jan 12;13(1):e0189898. doi: 10.1371/journal.pone.0189898 (PMC5766104; doi:10.1371/journal.pone.0189898)
Supplement: S2 File — (FASTA) [file pone.0189898.s005.fasta]

RPS18 - Ribosomal Protein S18
>TR157855|c2_g5_i1|m.21317 crypuribosomal protein s18 os=cryptocercus punctulatus pe=2 sv=1|GO:0005840 GO:0003723 GO:0003735 GO:0006412 GO:0042254
SNFVARRGIVHFRLCVAAVKMSLVIPEKFQHILRVQGTNIDGKRKVMFAMTAIKGVGRRYANIVLKKADINLDKRAGECTDEEVEKVITIILNPRQYKIPDWFLNRQKDIQDGKFSQLTSSNLDSKLRDDLERLKKIRAHRGLRHYWGLRVRGQHTKTTGRRGRTVGVSKKK
>TR201916|c0_g2_i1|m.59469 |40s ribosomal protein s18|GO:0005840 GO:0003723 GO:0003735 GO:0006412 GO:0042254
EFFCIMSLVFGEGGFQHILRIANTNVDGRQKVVYALKAIKGIGRRFASVIVKKADIDINKRAGELTNDEIDKLITVIAHPRQFRIPNWMLNRQKDIRDGKFSQVISNNLDSKLRDDLERLKKIRSHRGLRHYWGLRVRGQHSKTTGRKGRTVGVSKKKGG

Actin
>TR100436|c0_g1_i1|m.7432 | alpha-actinin a-like|GO:0005509
ISTLVKIGVEVSGGPAAELFEEVIINPDEHINLMEASGFLKRSRHRFDFESKITQEQVSEFRKLFNLYDLDGSGTINVIELASVLFKLGYTFSPENVDIIIQIVDDNMDGVLNFKEFLGFYDFLEYLKTLFDSADVDGNGSIDRNELKILLEKAGYNFTEKQIELFYKLCDEDESGALELADFFSLTLFIFWAQILFAKADTDGNDTVELMEFSNALRRLGIFMPPEALANYFNELDTDHDGHLNFNEYIEVVFMVKFLD
>TR134995|c0_g1_i1|m.9491 | low quality protein: actin-related protein 2 3 complex subunit 2|GO:0005885 GO:0034314
RMLLLDFHNKIIEDTLLEKFNITDGKFDSVEAVVADFDGVLFHLFTDAENKNILNISISIKCWGELEKYGVEEIMKKHYGNFLVTPESGYNCTIQIDCAKPPTDKAGCARTVALMKRHAMAAPFYKVFSDIEAKKGGNLVEIQYRDDEAFYLKPEVDRCIVIFSVRFKDADDVVLAKVFLQEFADARKTISNAPSVTYSQKE
>TR148374|c5_g1_i1|m.12725 9hemi muscle actin os=oncometopia nigricans pe=2 sv=1|GO:0005524
MCDDDVAALVVDNGSGMCKAGFAGDDAPRAVFPSIVGRPRHQGVMVGMGQKDSYVGDEAQSKRGILTLKYPIEHGIITNWDDMEKIWHHTFYNELRVAPEEHPILLTEAPLNPKANREKMTQIMFETFNTPAMYVAIQAVLSLYASGRTTGIVLDSGDGVSHTVPIYEGYALPHAILRLDLAGRDLTDYLMKILTERGYSFTTTAEREIVRDIKEKLCYVALDFEQEMATAAASTSLEKSYELPDGQVITIGNERFRCPEALFQPSFLGMESCGIHETVYNSIMKCDVDIRKDLYANTVLSGGTTMYPGIADRMQKEITALAPSTIKIKIIAPPERKYSVWIGGSILASLSTFQQMWISKQEYDESGPGIVHRKCF
>TR156039|c0_g1_i1|m.19709 | actin-related protein 2 3 complex subunit 3-like|GO:0005885 GO:0034314
GRRCCFLLPTLFSFSSFLRSQIMPPYHSNFNNTQAKVVCNMAILPLKTKYKGPAGQAPADQEDIIDEAISFFKANVLFRNYEVKGPADRVLIYLTLYISSCLTKADKQSKANAEKNFYQLAIENFALPGDRNFALGGLVTNPKDRAETDLMRQYLTQLRQELGTRLLPKLYLNGDAQPDKWWMCFLKRKFLNKNL
>TR177816|c6_g2_i1|m.42150 | actin-related protein 5|GO:0031011 GO:0006281 GO:0006355
MSELLFECYGVPGVTYGVDSLFSFWHNNGCGIQDWAIDFSKKSGLVISVGYRATHVIPIVLGVVKYHQARRLAVGGAHMSHFLHRLLQLKYPAHFNAITLSRVEELLHEHTYVAKNYEDELSKWMEDDVCEDGEKGGDELNSYYHTHVHRIQLPFVPVSNPILSLEQQKERRRELAKRLVEMNARKREERLAEDEERLHQLLAAQDLLEEGDEIEFEATLKECGLSNESELSKNILQLQARIEKTKQKIASLTTAEESVTDDTKGKFYKDSMDPKDYEEWISSLRKQRREILERQLQRRQRRQDMARRRTVAAQERMRLISELARKEKTKKRPGGGVNCSISGGDTDTFGMRDEDWDVYKAINREGGDSDSEEEHERLAEIEESLRRHDPDCLKSNDSSMRPGGPPSVADPAERHQLHVGVERVRTPEVIFQPHMLGVEQGGLSEVIECVLKQFSADVQQELANNLFISGAAAALPGLLGRLQMELQQIRPFGSKFKLSKPFDPSLNAWYGARNFALDPSLANYLITRADYEEYGGDYLKEHPASNPYIPSPILIESPCSTIASPSFRLSHCASINESTILSIDSFVGTEKEGSSPFKVSEFPSMMFDLLQEAVILVDDE
>TR177816|c6_g2_i7|m.42156 | actin-related protein 5|GO:0031011 GO:0006281 GO:0006355
MSELLFECYGVPGVTYGVDSLFSFWHNNGCGIQDWAIDFSKKSGLVISVGYRATHVIPIVLGVVKYHQARRLAVGGAHMSHFLHRLLQLKYPAHFNAITLSRVEELLHEHTYVAKNYEDELSKWMEDDVCEDGEKGGDELNSYYHTHVHRIQLPFVPVSNPILSLEQQKERRRELAKRLVEMNARKREERLAEDEERLHQLLAAQDLLEEGDEIEFEATLKECGLSNESELSKNILQLQARIEKTKQKIASLTTAEESVTDDTKGKFYKDSMDPKDYEEWISSLRKQRREILERQLQRRQRRQDMARRRTVAAQERMRLISELARKEKTKKRPGGGVNCSISGGDTDTFGMRDEDWDVYKAINREGGDSDSEEEHERLAEIEESLRRHDPDCLKSNDSSMRPGGPPSVADPAERHQLHVGVERVRTPEVIFQPHMLGVEQGGLSEVIECVLKQFSADVQQELANNLFISGAAAALPGLLGRLQMELQQIRPFGSKFKLSKPFDPSLNAWYGARNFALDPSLANYLITRADYEEYGGDYLKEHPASNPYIPSPILIESPCSTIASPSFRLSHCASINESTILSIDSFVGTEKEGSSPFKVSEFPSMMFDLLQEAVILVDDE
>TR179875|c11_g7_i1|m.43774 triif actin filament-binding protein afadin os=triatoma infestans pe=2 sv=1|GO:0007165
MKLSLLFSDMWSITSQNFINEAQTLLATPRSPDGSFTGNTPGVIGAQEVYRDPRTRRLAEQQKLMVNRTGPLPEKLSFKEKMKMFAMETGEDGTPKDKVKISRAQRDIEGPVPPNGYGPN
>TR193418|c4_g3_i9|m.53841 triif actin os=triatoma infestans pe=2 sv=1|GO:0005885 GO:0005524 GO:0034314
MFEKYCFSGAYIAIQAVLTLYAQGLLSGVVVDSGDGVTHICPVYEEFALPHLTRRLDIAGRDITRYLIKLLLLRGYAFNHSADFETVRIMKEKLCYIGYNIETEQKLALETTVLVEPYT
>TR210902|c5_g2_i2|m.70946 | actin-related protein 8 isoform x3|GO:0031011 GO:0006338
RDGDGPLEPDPGTLLGLDQAIIQSIDRCSSDDLKRKMYSCILVVGGGMKFKGIGMWLKSRLSLQIPYMYRGEQLDVITQPKDMDQQITAWKGAAIMSCLEPAHELWIRPSEWSRFGVKLLRERAPFMW
>TR222324|c3_g1_i3|m.82069 triif actin filament-binding protein afadin os=triatoma infestans pe=2 sv=1|GO:0007165
PLHHPPPPPPPPSAEASAKVRAQEREALSHVIAQWNANRLDLFELSDPNEDLEFHGVMRFYFQDSGQKVATKCIRVASSAPATAVVETLIEKFRPDMRMLSVPEYALYEIHENGDERRLAEDEKPLLVQLNWHKDDREGRFLLRRIDDKTNVPAASFQESGSSFRRKLSKREKKQLKKQEKMNKLKGAGGSIGGGGAASAGAGGSLGPGADNGESGGVAEKLYTELPETSFTRSISNPEAVMRRRRQQKLERKLQQFRSKDGGPDTGGTLKIYGESLCRDVPYKTLLLSVRDTAAVVVREMLSKYGLTRVDPSQYCLIQVNVLGPDSGVDSSKEYHGGTNREYILDDDECPLAILMNHPSSRGSIMFHVRRRPADYHPRKRKKKPQQGGQKGGSGGGGG
>TR233184|c1_g1_i1|m.89328 9hemi actin-related protein arp2 3 complex subunit arpc2 os=panstrongylus megistus pe=2 sv=1|GO:0005885 GO:0034314
MILLEINNRIVEETLTLKYKNALAGHKPESIDITIADFDGVLFHLSNPGGDKTKVRISISLQFYKELQEHGADELLKREYGPLLTTPEDGYNVSLTVDLEDIPADWETSIVKKVGLLKRNCFASVFEKYFEFQERGEEGHKRAVINYRTDETLYVEAKADRVTVVFSTLFRDEDDVVIGKVFMQEFKEGRRASQTAPQVLFSHRDPPMELEGGIAGARKDGTLNNNIGYITFVLFPRHTNAATRDNTINLIHTFRDYLHYHIKCSKAYVHSRMRAKTSDFLKVLNRARPEPKNVEKKTITGRTFIRKD

RPL13a - Ribosomal Protein L13a
>TR211945|c10_g1_i1|m.71837 | 60s ribosomal protein l13a|GO:0015934 GO:0003735 GO:0006412 GO:0042254
RVNLLSTMVGMSDKPVVIDGKGHLLGRLAAIVAKTALQGNSVIILRCEQINISGNFFRTKLKYLAFLRKRCNVNPARGPFHFRAPAKIFWRTVRGMLPHKTQRGKDALRRVKAYDGCPPPYDRRKKLVVPGAMRVLCLKPGRKYCHLGRLSHEVGWKYQHVVRTLEAKRKLKSILDLRRRKILNKITKMATDKVAPRVEPYTNVIQSYGYN

v-ATPase - vacuolar-type H+-ATPase
>TR145672|c7_g3_i1|m.10567 9neopvacuolar-type h+-atpase subunit g os=nasutitermes takasagoensis pe=2 sv=1|GO:0016471 GO:0016820 GO:0015992
FLGQLSCDRSSTVAEIVKMASQSQGIQQLLTAEKRAAEKVAEARKKKARRLKQAKEEAQDEIEKYRQERERQFREFEAKHMGSREDVAARIEADTKIKIEEMNKAVVMHKEVVIQRLLQLVYDIKPELHKNYAASLGGQH
>TR174065|c3_g2_i3|m.39480 9neopvacuolar-type h+-atpase subunit a os=nasutitermes takasagoensis pe=2 sv=1|GO:0033180 GO:0005524 GO:0046961 GO:0006119 GO:0015991
MSKSSGRMQDEDRESKYGYVFAVSGPVVTAERMSGSAMYELVRVGYHELVGEIIRLEGDLATIQVYEETSGVTVGDPVLRTGKPLSVELGPGILGSIFDGIQRPLKDINEISNSIYIPKGVNIPALSRTEMWDFQPLNIKMGSHITGGDLYGMVHENTLIKHKLLLPPRAKGTVTYIADPGSYSVTDVVLETEFDGERSKYTMLQVWPVRQPRPVTEKLPANYPLLTGQRVLDALFPCVQGGTTAIPGAFGCGKTVISQSLSKYSNSDVIVYVGCGERGNEMSEVLRDFPELTVEIDGVTESIMKRTALVANTSNMPVAAREASIYTGITLSEYFRDMGYHVSMMADSTSRWAEALREISGRLAEMPADSGYPAYLGARLASFYERAGRVKCLGNPEREGSVSIVGAVSPPGGDFSDPVTSATLGIVQVFWGLDKKLAQRKHFPSINWLISYSKYMRALDDFYDKNYPEFVPLRTKVKEILQEEEDLSEIVQLVGKASLAETDKITLEVAKLLKDDFLQQNGYTPYDRFCPFYKTVCMLRNIIAFYDMARHAVESTAQSENKITWSIIRESMGNILYQLSSMKFKDPVKDGEAKVKADAEQLHEDIQQAFRNLED
>TR174065|c3_g2_i6|m.39481 baccuv-type proton atpase catalytic subunit a isoform 1 os=bactrocera cucurbitae gn=vha68-1 pe=3 sv=1|GO:0033178 GO:0005524 GO:0016820 GO:0015991
MKRTALVANTSNMPVAAREASIYTGITLSEYFRDMGYHVSMMADSTSRWAEALREISGRLAEMPADSGYPAYLGARLASFYERAGRVKCLGNPEREGSVSIVGAVSPPGGDFSDPVTSATLGIVQVFWGLDKKLAQRKHFPSINWLISYSKYMRALDDFYDKNYPEFVPLRTKVKEILQEEEDLSEIVQLVGKASLAETDKITLEVAKLLKDDFLQQNGYTPYDRFCPFYKTVCMLRNIIAFYDMARHAVESTAQSENKITWSIIRESMGNILYQLSSMKFKDPVKDGEAKVKADAEQLHEDIQQAFRNLED

ATP
>TR175305|c2_g1_i1|m.40165 9neopatp synthase subunit alpha os=pararge aegeria pe=3 sv=1|GO:0045261 GO:0005524 GO:0046933 GO:0046961 GO:0006119 GO:0015986 GO:0015991
MILDTAPWTTHHSASEASVGRVISVGDGIARVHGLSDIKAGELVVFQSNLRGMALNLENDIVGIVIFGNDRLVSEGDTVKRTNAIISIPVGLKAIGRVLDPLGRALDGKGSIKKMEPLTSNRIEVKAPGIIRRKSVHEPLQTGIKAIDSLLPIGRGQRELIIGDRQTGKTAICIDTIINQKKFFKTDKPKNNVYCIYVAIGQKRSTVAQIIETLNRYNAMEYTTVISATSSDSAPLQFLAPYSGCALGEFFRDSGMHALIVYDDLSKQAVAYRQMSLLLRRPPGREAFPGDVFYLHSRLLERAAKMSRQFGEGSLTALPIVETQAGDVSAYIPTNVISITDGQIFLETELFYRGIRPAINAGLSVSRVGSAAQIKTMKQVSGSLKLELAQFREMAAFAKFGSDLDESTQQLLKRGTRLTELLKQPQYMPLPIEKQILSIFAGVNGYLDSLDVTDVLRFEKELHEFVDNSPVFKPCVNKANKVLDVKAFHAVVSYFKNYEFF
>TR182352|c0_g2_i1|m.47040 homvi vacuolar atp synthase subunit d os=homalodisca vitripennis pe=2 sv=1|GO:0042626 GO:0006810
MSRIPIFPSRGAQTLMKGRLKGAQKGHSLLKKKADALQMRFRLILNKIVETKTLMGEVMKEAAFSLAEAKFATGDFNQVVLQNVTKAQIKIRTKKDNVAGVTLPVFESYQDGTDTYELAGLARGGQQLAKLKKNYHKAVVLLVELASLQTSFVTLDEVIKITNRRVNAIEHVIIPRIERTLAYIISELDELEREEFYRLKKVQDKKRVARAKKEKETAAAIAEGKAADREYAVNNMLDEGDEDLLF
>TR19630|c0_g1_i1|m.1755 9neoph+ transporting atp synthase beta subunit isoform 1 os=pararge aegeria pe=4 sv=1|GO:0033178 GO:0016820 GO:0015991
LSEEDKQIVYRARKIQKFLSQPFAVAEVFTGMQGKFVPLQENISGFKSILEGKYDHLPEVAFYMVGPISEVEGKAKQLASQAPTEKKDDKKDDKKEEKKSDSKGLSIPEFIAHTRAQGKQWLEEELAQAKERQGDAAELEAIKKKWEQWEQSLEGEQKSMEEKIAKKKAAAATATPLPAAQKKAAAH
>TR197283|c0_g1_i3|m.55829 14647 pe=3 sv=1|GO:0033178 GO:0045259 GO:0005524 GO:0046933 GO:0015986 GO:0015991
FSSDTMLSAVTRATAGVLRGVKPALKPQTLQNETAKATSIFFSNNRTSYATQAQPKAGTAKGRVVAVIGAVVDVQFDDQLPPILNALEVKDRKPRLVLEVAQHLGESTVRTIAMDGTEGLVRGQEVSDSGFPIRIPVGAETLGRIINVIGEPIDERGPITTDKFAAIHADAPEFVEMSVEQEILVTGIKVVDLLAPYAKGGKIGLFGGAGVGKTVLIMELINNVAKAHGGYSVFAGVGERTREGNDLYHEMIESGVISLKDKTSKVALVYGQMNEPPGARARVALTGLTVAEYFRDQEGQDVLLFIDNIFRFTQAGSEVSALLGRIPSAVGYQPTLATDMGTMQERITTTKKGSITSVQAIYVPADDLTDPAPATTFAHLDATTVLSRAIAELGIYPAVDPLDSTSRIMDPNIIGAEHYNVARGVQKILQDYKSLQDIIAILGMDELSEEDKLTVARARKIQRFLSQPFQVAEVFTGHAGKLVPLEDTIKGFKKILGGEMDHLPEVAFYMVGPIEEVAEKAEKLAKEAV
>TR197283|c0_g1_i6|m.55831 9hemiatp synthase subunit beta os=riptortus pedestris pe=2 sv=1|GO:0033178 GO:0045259 GO:0005524 GO:0046933 GO:0015986 GO:0015991
MDGTEGLVRGQEVSDSGFPIRIPVGAETLGRIINVIGEPIDERGPITTDKFAAIHADAPEFVEMSVEQEILVTGIKVVDLLAPYAKGGKIGLFGGAGVGKTVLIMELINNVAKAHGGYSVFAGVGERTREGNDLYHEMIESGVISLKDKTSKVALVYGQMNEPPGARARVALTGLTVAEYFRDQEGQDVLLFIDNIFRFTQAGSEVSALLGRIPSAVGYQPTLATDMGTMQERITTTKKGSITSVQAIYVPADDLTDPAPATTFAHLDATTVLSRAIAELGIYPAVDPLDSTSRIMDPNIIGAEHYNVARGVQKILQDYKSLQDIIAILGMDELSEEDKLTVARARKIQRFLSQPFQVAEVFTGHAGKLVPLEDTIKGFKKILGGEMDHLPEVAFYMVGPIEEVAEKAEKLAKEAV
>TR202084|c5_g4_i2|m.59644 9hemi mitochondrial atp synthase alpha subunit os=sitobion avenae pe=4 sv=1|GO:0015992 GO:0046034
MVEFSSGLKGMALNLEPDNVGVVVFGNDKLIKEGDIVKRTGAIVDVPVGEDLLGRVVDALGNTIDGKGPVNTKQRYVGFFIFISEASCPTFLFEHNTSSFFTL
>TR228886|c0_g2_i1|m.85609 copfo vacuolar atp synthase subunit e os=coptotermes formosanus pe=2 sv=1|GO:0033178 GO:0046961 GO:0015991 GO:0006119
MALSDADVQKQIKHMMAFIEQEANEKAEEIDAKAEEEFNIEKGRLVQQQRLKIMEYYERKEKQVELQKKIQSSNMLNQARLQVLKVREDHIGRVLDEARKRLGEVTRNPPQYSRLLHSLILQGLMQLLETNVVLRVREIDVGLVKSVIEGVQQKYNEATQKTVNLKIDTESYLPPDM

Phosphofructokinase 
>TR160246|c3_g2_i1|m.25778 | 6-phosphofructokinase isoform x3|GO:0003872 GO:0006002 GO:0006096 GO:0005945 GO:0006000 GO:0006012 GO:0006013 GO:0006094 GO:0006098
MHEEKTRFIERGSHKGKGIAVFTSGGDSQGMNAAVRAVVRMGIYLGCKVYFIKEGYQGMVDGEEYIVEATWASVSSIIHKGGTVIGSARCSDFRERAGRLKAARNLVSKGITNLVVIGGDGSLTGANLFKQEWGSLLDELLSQGLITKEAREKYSHLHIAGMVGSIDNDFCGTDMTIGTDSALHRIIEATDAIVSTAYSHQRTFIMEVMGRHCGYLSIVAALTSEADYVFCPESPPPHDWPEKLCKKLEQERAAGQRLNIIIVAEGAIDRNGEPITAEKVRQVVVDNIGQDTRITVLGHVQRGGSPSAFDRVLGCRMGAEAVMALMEATNETEACVVSLDGNQAVRLPLMECVEKTKAVSKALADKQWELAVQLRGRSFARNLETYKMLTRLKPPKSAFNEAGQGVVSYLFCILCIA
>TR160246|c3_g2_i6|m.25785 | 6-phosphofructokinase isoform x3|GO:0005945 GO:0003872 GO:0005524 GO:0006000 GO:0006002 GO:0006012 GO:0006013 GO:0006094 GO:0006096 GO:0006098
MHEEKTRFIERGSHKGKGIAVFTSGGDSQGMNAAVRAVVRMGIYLGCKVYFIKEGYQGMVDGEEYIVEATWASVSSIIHKGGTVIGSARCSDFRERAGRLKAARNLVSKGITNLVVIGGDGSLTGANLFKQEWGSLLDELLSQGLITKEAREKYSHLHIAGMVGSIDNDFCGTDMTIGTDSALHRIIEATDAIVSTAYSHQRTFIMEVMGRHCGYLSIVAALTSEADYVFCPESPPPHDWPEKLCKKLEQERAAGQRLNIIIVAEGAIDRNGEPITAEKVRQVVVDNIGQDTRITVLGHVQRGGSPSAFDRVLGCRMGAEAVMALMEATNETEACVVSLDGNQAVRLPLMECVEKTKAVSKALADKQWELAVQLRGRSFARNLETYKMLTRLKPPKSAFNEAGQGVEGYTLAVMHIGAPACGMNAAVRSFVRNCIYRGDTVYGIHDGIEGLIVGNIKSMGWADVTGWVGQGGAFLGTKRTLPGSRIDKIAARLAEYKIQALLIIGGFEAYQAGLQLYEAREKFKECCIPIAVIPSTISNNVPGTEFSLGCDTALNEITEICDRIRQSAQGTKRRVFVIETMGGYCGYLATVAGLAGGADAAYIYEEKFSIKDLQQDVYHMAAKMGDGVQRGLILRNEKAND

Histon
>TR187907|c4_g2_i11|m.49198 | histone partial|GO:0000786 GO:0005634 GO:0003677 GO:0046982
MLLTFLRNIFVKLTDEISSSFQVLELAGNASKDLKVKRITPRHLQLAIRGDEELDSLIKATIAGGGECCKPFVFGVVIEVVIAIVSYDPILILGVIPHIHKSLIGKKGSQKPA
>TR219562|c0_g1_i2|m.79263 aedalhistone h3 os=aedes albopictus pe=2 sv=1|GO:0000786 GO:0003677 GO:0046982
MARTKQTARKSTGGKAPRKHVASKAARKSAVSGGGVKKPHRFRPGTVALREIRRYQKSTELLIRKLPFQRLVREIAQDYKTDLRFQSSAIAALQEAAEAYLVGLFEDSNLCAIHAKRVTIMPKDIQLARRIRGERA

Elongation factor
>TR101334|c0_g1_i1|m.7478 lycsitranslation elongation factor 2 os=lycosa singoriensis pe=2 sv=1|GO:0005525
FYAFGRVFSGTVASGQKVRILGANYKLGKKDDLYEKNIQRTVLMMGRTVESIPDVPCGNTVALSGVDQYLIKTGTITSIIEGESHPIRSMKYSVSPVVRVAVKPKNPADLPKLVEGLKKLSKSDPLVVCEFEESGENVIAGCGELHVEICLNDLEKDFAQCDIIKSDPVVTYKETMTALSSANAMTKSQNKHNRIHGTGGPLQDQLCELIENGEITATQDIKTRGKRLAEEFEWEKDDTTKIWCFGPDNTGPNMVVDITKGVQSMNEIKESMVSSFQWSSKQGVLCDENMRGMRFNIIDCELHTDAIHRGGGQLMPAARRLYYALEMLCEPTLLEPIFSCDITAPMDSMGGVYQSLNQRRGQGIEEIQIAGTPLNLVKAYLPVSESFG
>TR123292|c0_g1_i1|m.8762 |elongation factor 1-alpha|GO:0005840 GO:0003746 GO:0003924 GO:0005525 GO:0006448
ENKQNKHLFCIVFLHQALNQNTMGKEKTHINIVVVGHVDAGKSTTTGHLIYKCGGIDKRTIEKFEKEAKEIGKASFKYAWVLDKLKAERERGITIDIALWKFETSKYYFTIIDAPGHRDFIKNMITGTSQADCAVLVVAAGQGEFEAGIASTGQTREHALLAYTLGVKQMICVVNKMDDKSVNYSEARFTEIKNEVSSFIKKIGYNPEKVPFVPISGWNGDNMLERSTNLPWWKGPTLIEALDSLEPPKRPSDKPLRIPLQDVYKIGGIGTVPVGRVETGILKPGMVVTFAPTNVTTEVKSVEMHHEALTQALPGDNVGFNIKNVSVKDIRRGNVCGDSKNNPPFETDTFNAQVIILNHPGQIHAGYAPVLDCHTAHIACKFAELVTKVDRRSGKELEAAPKMIKSGDAAIVKLIPTKPLCVETFSEFPPLGRFAVRDMRQTVAVGVIKETVKKQPGSGKAEDKKAAKPAAKAAKK
>TR124227|c0_g1_i1|m.8826 9maxieukaryotic translation elongation factor 1 alpha os=stephos longipes gn=eef1a pe=2 sv=1|GO:0005525
VEQGMVKPGQEVVFIPTHTKANECSGKVFTVEMHHKQMAEAGPGSNIGMNIKGLNKGNMPRVGDIMILKTDATLGPVKSFVAQVKVLTHPGELKVGYSPIAFVRTARSAVKMVNIAWKIGKATGGKKQDAPQFVKANEMAELTFEPLSPFVVDTFKSCEGLGRIAIM
>TR129664|c0_g1_i1|m.9159 9acar elongation factor 1 beta os=rhipicephalus pulchellus pe=2 sv=1
NNSKDNSLLSKNLPPPFPLIMPAKFDVSSSSGVEQLNKHLADKSYIEGYTPSGADADTFAAFTSAPDAKNIHAHRWYKHIRSFSESERKSWGGSGAAAAPEAKPAAAKKDDDFDLFGEEDEEAEKAREAEIERKAQEQLRKKEEERLKSGKAKAVLKSAVVL
>TR136148|c0_g1_i1|m.9563 9acar translation elongation factor ef-1 gamma os=amblyomma cajennense pe=2 sv=1|GO:0005840 GO:0003746 GO:0005515 GO:0006448
FIPPTPLPSLSASSFESNLKKMAKLFTDEANPAAWKILVAAKYAGFSIEVPSFTAGQDNKTAEFEKKSPLHKFPVLETANGAIFEPNAAARYVARHSKTSLFGNSDFEAAQVDQWIDFSITEIDLPASVWVFPILGLIQNNPTATTRAKGDIRKILEILNNHLADKTFLVGERISLADIVVATSLHRLYTRVLDHGFRKGFGNTDRWFTTVVNQPPFLEVAGNTVLASKMEVAPSGGEEVKQKTPKEPKEPKAPKESKPKEAAAPKETPAFKPAALEDDDDEAKEEKVRSKLDLLPKSKFVLDDWKRTYSNEETRAVALPYFWTNYDREGYSIWFCDYKHNNEFGKVFMAANLVSGFFQRLEKLHKYAFGSFLILGEDDNIEITGVWVFRGTEIPDEMKECDDSEQYSWKKADIDDAATKELINDYFAWDSTTNFGGRKLQFNQGKAYK
>TR146349|c0_g2_i2|m.11315 papplelongation factor 1 beta os=papilio polytes pe=2 sv=1|GO:0005840 GO:0005853 GO:0003746 GO:0006448
MVLASWKDAEAAKIREERLKEYAAKKSKKPALIAKSSIVLDVKPWDDETDMKQMEEKVRSIEMDGLVWGASKLIPLAFGIQKLQIMCVIEDEKVSVDLLTEDIQGLEDLVQSVDIAAFNKI
>TR148699|c1_g1_i3|m.12881 9neoptranscription elongation factor spt4 os=pararge aegeria pe=3 sv=1|GO:0005634 GO:0008270 GO:0032786
MSLETIPKDLKNLRACLVCSLIKTLDQFEFDGCDNCDEFLRMKNNRDNVYDCTSTNFDGLIAVMSPEDSWVCKWQRVSRFSKGIYAISVSGRLPQGIIRDMKSRGIPYRSRDTSQR
>TR156724|c2_g1_i2|m.20700 | translation elongation factor 2|GO:0003924 GO:0005525
MVNFTVDEIRVMMDKKRNIRNMSVIAHVDHGKSTLTDSLVSKAGIIASAKAGETRFTDTRKDEQERCITIKSTAISMYFELEDKDCVFITNPDQRDKGEKGFLINLIDSPGHVDFSSEVTAALRVTDGALVVVDCVSGVCVQTETVLRQAIAERIKPVLFMNKMDRALLELQLEQEDLYQTFQRIVENVNVIIATYSDDSGPMGEVRVDPSRGSVGFGSGLHGWAFTLKQFAEMYAEKFKIDVVKLMNRLWGESFFNTNTKKWAKQKDDENKRSFSLYVLDPIYKVFDAIMNYKKDQVTSLLTKLNIELKGDDKDKDGKALLKVVMRTWLPAGEALLQMIAIHLPSPVVAQKYRMEMLYEGPHDDEAAIGVKNCDPNAPLMMYISKMVPTSDKGRFYAFGRVFSGKVATGMKARIMGPNFIPGKKEDLYEKAIQRTILMMGRYVEAIEDVPSGNICGLVGVDQFLVKTGTITTFKDAHNMRVMKFSVSPVVRVAVEPKNPADLPKLVEGLKRLAKSDPMVQCIIEESGEHIIAGAGELHLEICLKDLEEDHACIPIKKSDPVVSYRETVSEESDQMCLSKSPNKHNRLFMKAVPMPDGLPEDIDKGEVNPRDDFKSRARYLGDKYDYDVTEARKIWCFGPDGTGPNILIDCTKGVQYLNEIKDSVVAGFQWATKEGVLSEENLRGVRFNIYDVTLHADAIHRGGGQIIPTTRRCLYACILTAQPRLMEPVYLCEVQCPEVAVGGIYGVLNRRRGHVFEEMQVAGTPMFVVKAYLPVNESFGFTADLRSNTGGQAFPQCVFDHWQVLPGDPLELTTRPYTVVQETRKRKGLKEGLPDLAQYLDKL
>TR158533|c6_g1_i16|m.23171 9acar elongation factor 1 alpha os=amblyomma cajennense pe=2 sv=1|GO:0003924 GO:0005525
MVAFLYRSRGITMDVGQNRFDTPTKAVVLLDAPGHRDFIPNMISGASRADVALLVVDATRGEFETGFESGGQTREHALLVRSLGELLSLLLLFTTRLINVWWRIGNKN
>TR178969|c7_g1_i9|m.43514 | elongation factor mitochondrial|GO:0003924 GO:0005525
MYCIARKQRYVAKIVETGSRFLIKCPRCKSSFAKFAEHKDLEHIRNIGISAHIDSGKTTLTERILYYTGRISEMHEVKGKDNVGATMDSMELERQRGITIQSAATYTIWKDHNINIIDTPGMKGCCS
>TR179887|c1_g1_i2|m.43833 | eukaryotic translation elongation factor 1 epsilon-1
MVFNGSLCASVGKWLNVNCENISAENSDVQMKCSRSGRIINGSMSIILHLARESSYPKAMGGSLEEEAEVRQWLEFALLLINLSSNTAMRRNMFKTLNDALSSRTFLVGNRLTVSDVMMYQALYSFLVSNVLYVLLF
>TR179917|c1_g1_i1|m.43918 locmitranslation elongation factor-1 gamma os=locusta migratoria pe=2 sv=1|GO:0005840 GO:0003746 GO:0005515 GO:0006448
MASGTLYTYPENFRAYKALIAAEYSGAKVKVAQDFVFGQTNKTEAFLKKFPLGKVPAFETADGKCITESNAIAYFVANDQLRGRNDLEKAQVIQWMAFADNDILPASCTWVFPCLGIMQYNKQNTERAKDDVKKALNAMNSHLLHVTYLVGERITLADISVCCTLLHLYQFVLDPAFRKSFQNVNRWFTTIINQPQVKAVIGDFPLCDKMAEFDAKKFAELQGKIGKDSGKDKKSNKKEKVEKPQEKQAETPKKAAAEELDETEKALAEEPKSKDPMDALPKGTFDLDDFKRYYSNEDEAKSIPYFWEKFDKENWSVWVCEYKYPEELAKIFMSCNLIAGFYQRLGKLAKNAFASMCVFGQDNDNSISGVWVWRGHDLAFKLSPDWMVDYDSYHWKKLDNNSEETKKIVEQYFSWTGNDKSGKKFNQGKIFK
>TR180542|c4_g1_i2|m.44283 | elongation factor tu|GO:0005840 GO:0003746 GO:0003924 GO:0005525 GO:0006448
MNTVIKTSKPEASIRASMASLVITRILHNTVLPRALGHYVKLRPFSQYTSRLRVQQVLIPTHTSRRGYAIEKKVYQRNKPHCNVGTIGHVDHGKTTLTAAITKVLADKALAQAKLYTDIDNAPEEKARGITINVAHVEYSTPNRHYGHTDCPGHADYIKNMITGTAQMDGAILVVAATDGAMPQTREHLLLAKQIGVNHIVVFINKVDAADQEMVDLVEMEIRELMTEMGYDGNDLPIVKGSALHALEGKSPEIGADAIMQLLEAVDKHIPTPMRDLDKPFLLPVENVYSIPGRGTVATGKLERGVLKKGNECEFVGYNKVVKSTVTGVEMFHQTLEEAQAGDQLGALVRGVKREDIRRGMVMVKPGTAKAFDHLETQVYILNKEEGGRSKPFMSFAQMQMFSKTWDCPTQIQIPDKEMVMPGEDAKLILKLFRPMVVEQGQRFTLRDGNKTLGTGVIAKTLTPLTEKERLALSVGKKVLKEAAKAKGK
>TR189177|c0_g1_i1|m.49811 9hymeelongation factor 1-alpha os=chalybion californicum gn=ef-1a-f1 pe=4 sv=1|GO:0003746 GO:0005525 GO:0005840 GO:0006448
MHHESIPEAIPGDNVGFNVKGLSVKDIKRGYVCGDAKNDPPKETETFLAQVIIMNHPGQIENGYTPVLDCHTAHIACKFQEITAKIDRRTGKATEEEPKFVKNGDSALILLKPTK
>TR191575|c4_g1_i4|m.52624 | elongation factor mitochondrial|GO:0005840 GO:0003746 GO:0005515 GO:0006448
MQMIRYFHCGRICWANLNKSLLAKLRKKTGYTFTNCKKALELHSNDLTKAESWLREQAQAQGWEKATKFEGRPTSQGLIAVFVDVAGRHGSMVEVNCETDFVARNRAFQSVVERISEACFKYIQGVPTSTIYPFTKVHLDVDQLKQLPSLKGSSLADEVALAIYSVGENIVIRRAVGFKARDEDHKLFLSGYVHPTPVNNLATGTPLLGRYGALVVLKGGQGHQKEELLGRQLCQHIVGMNPWRVGGEGDEPAKNPEDEHCLLLQEYLLDPLTTVGNFLNESDLSVLDFARFECGEKAGEPHKIPESTAAKASN
>TR193456|c8_g3_i3|m.54006 9hemitranscription elongation factor s-ii os=riptortus pedestris pe=2 sv=1|GO:0005634 GO:0003676 GO:0008270 GO:0006351
MKYKNRVRSRVANLKDSKNPSLRLNFLCGALAPQRLAIMTAEEMASDEMKALREKFKKESIDDAQLATVQGTKTSLLKCAKCKKRNCTYSQVQTRSADEPMTTFVLCNECGNRWKFC
>TR193906|c0_g1_i1|m.54483 9hemielongation factor 1-alpha os=oncometopia nigricans gn=ef1a pe=2 sv=1|GO:0005840 GO:0003746 GO:0003924 GO:0005525 GO:0006448
MGKEKVHINIVVIGHVDSGKSTTTGHLIYKCGGIDKRTIEKFEKEAQEMGKGSFKYAWVLDKLKAERERGITIDIALWKFETAKYYITIIDAPGHRDFIKNMITGTSQADCAVLIVAAGTGEFEAGISKNGQTREHALLAFTLGVKQLIVGVNKMDSTEPPYSEARFEEIKKEVGNYIKKIGYNPAAVAFVPISGWHGDNMLEPSDKMPWFKGWKVERKDGNADGKCLIEALDAILPPSRPTEKPLRLPLQDVYKIGGIGTVPVGRVETGVMKPGMLVTFAPANITTEVKSVEMHHEALQEALPGDNVGFNVKNVSVKELRRGYVCGDSKTNPPKAASDFTAQVIVLNHPGQIANGYTPVLDCHTAHIACKFAEIKEKCDRRTGKTTEENPKSIKSGDAAIVNLVPSKPMCVESFQEFPPLGRFAVRDMRQTVAVGVIKSVNHKEVTTGKVTKAAEKAQKKK
>TR201543|c0_g1_i6|m.59203 triif elongation factor tu gtp-binding domain-containing protein 1 os=triatoma infestans pe=2 sv=1|GO:0003924 GO:0005525
MRLVSKEKLQELQKRPSAIRNICIMAHVDHGKTTFADSLVASNGIISPRLSGKLRYMDSRKDEQERGITMKSSSIALFHSLDEAKEFLVNVIDSPGHVDFSSEVSTAVRLCDGAVVLVDVVEGVCPQTKVSLKQAWEENIKMVLVLNKMDRLIVEMKLTPLDAYIHLTQIMEQVNAVMGELFASSVLGKTESVEETEKSKSTSSNVYDWSSGLEDVDDSNLYFSPDQGNVIFASAVDGWGFEVKHFAKIFSKKMSVEESLLEKSLWGDYYFNSKTKQITKGAQMKAKKPLFVQLILESLWSLYDTVIIRKDKEKIPKITESLGIKLSARDLRHTDCKVQLQALFSQWLPLANAILDMVCERLPSPLDLSDEKVDKLFCVPSTSVNSLPEEIRNLKSAFKNCSNGEEAPAIVFISKMFPVDRKNLPMNKQRPLTAEEIAQRREMARQRHAEKLMSLSIKASSESEETSQLVVQESPEDIKQEPEVVMDDDAFIAFARVFSGNLKPGRQLYVLGPKHDPCKALTKFKDGKEIDPSLTLKDLKSGQHITIAIVNDLFLLMGRELEALEEAPAGNIIGIGGLEEHVLKSATLSSSICCPSFRESRSSLAGDMAIFRVAVEPRNPSEMPALVKGLRLLNQADAAVQVLVQETGEHVLATAGEVHLQRCLQDLRERFAKIEINASEPIVPFRETIVHPPKLDMVNEVIQEQNTSVKKVKEDGSDGDGLVTITTPNKRSILKMRAVPLPETVTDILLKNGDVIRAMDKYHDRQSALEDEARSKMENLTLAGVQSTAHIPTGCLPEAILNAAEDLRIKLKKEFSNSGKNWEGAENNIWSFGPKRCGPNILLNKIPNAPNLRFWNEAEASKEISDQKSEQLYKYSGSFVNGFQLATLAGPLCEEPVMGVCFVVEDWTILELAEDDTNESVATSMPYGPFSGQIMSGVKEACRKAFQAQPQRLMAAMYSCSIQVNAEVLGKLYAVLGRRHGRILAGDMAEGSTTFSVTAVLPVVESFNFAPEIRKQTSGLAVSPQLFFSHWEVVDIDPFWVPSTQEEYLHFGDKADAENRARKYVDDVRRRKGLSVEKKIVEHAEKQRTLSKKK
>TR215104|c3_g1_i3|m.73937 9hemi negative elongation factor d os=panstrongylus megistus pe=2 sv=1|GO:0005634 GO:0045892
MDEYDDKGWDGDAVDGDSDGGEESNENPQEVLKECLHKFSTPDYIMEPGIFAQLKRYFQAGGNPEQVIELLSQNYTAVAQMANLLAEWLILGGVKVTDVQAMVENHLKDMILKTFDPKKADTIFSEEGETPGWLTEMIEHPTWRSLIYRLAEEYPDCLMLNFTIKLISDAGYQGEITSISTAAQQIEVFSRVLKTAITGFLQSGDDWQTSIQECAKMVCHGQHTYVYSQVLLQVLAQETKGGSNMKRLLQEITRCAQKNRHDVTPITMALNGASGYPQACQALTSMLSRNTLNPADITVLYRNYSALDPPPTDLIRNPQFLELLVDALFKPGVKLNPEHKSKYMYLLAYAASVCEIPGKEGKGQKGTQGRRGTSLSKDELKATAQAIEKVHAVCCSTRGSTELIADLSTLYQCIRFPVVSVGMVRWVESTVTEPSYFKLCTEHTPIHLALLDEVAACHPLLHPKVLSLLVCLFESKQDELEILVQLEMRKMLLDRMVNLLSRGCVVPVVKYVKQCWQRGDTDISLIRYFVTEVLEAIAPPYSPEFVQLFLPMVENEEITGTMRCDGDNDPVSEFIGHCKANYALV
>TR217318|c2_g1_i4|m.77049 | transcription elongation factor spt5|GO:0006355
MSDSEGSAYSDNESDAGSGVDHGGSDRGSERMSDRGSDSEPEADAKSDGGVSDGGSIPKSDDEDEDDMRHRRRTSHDDDDDEEEEEVRGRRRRSSSGQGAEDDEAEEVAPGEEEEDGEEEPEPEGEDLHTEDEEEDDDEIDEEEEEDEDDEEDDRPRKRRKKGRDRFGGFIIDEAEVDDENEDEEEWEAGAEGAAGEILAGIVGNEVDEVGPTAREIEGRRRRGHGVWDSRREDEIEEYLRRKYADGDGSIGDGGGRGGFDKGFSASRRFGDGGEDLSDEITQQTLLPGVKDPNLWLVRCRIGEEKATALLLMRKYIAYQFSSEPLQIKSVVAPEGLKGYIYIESYKQTHVKHAIENIGNLRMGQWKQQMVAIKEMTDVLRVVKEKTGLKPKQWVRLKRGLYKDDIAQVDYVDEAQNQVHLKLLPRIDYTRPRGALRTSQADNEDNKRKKKRRPPAKPFDPEAIRAIGGEVASDGDFLIFEGNRYSRKGFLYKNFTMSAIISDGVKPTLSELERFEEAPEGVELELPTAGTKGLGSKGLAGLAGGLKDDAAHSFSTGDNVEVCEGELLNLQGKILAIDGSKITVMPKHEDLKEPLEFQASELRKHFRMGDHVRVLSGRYEGDTGLIVRVEENRIVLFSDLTMHELEVLPRDLQLCSDMATGVDSLGQFQWGDLVQLDPQTVGVIVRLERESFHVLSMHGKVVEAKPQALHKRKESRNAVALDSYQNTIQRRDIVKAIDGPHAGRYGEIKHLYRSFAFLHSRLYLENGGILVCKTRHLQLAGGSKNTSNASITGNAGFMSPRISSPMHPSGGGRG
>TR219977|c3_g1_i3|m.79942 | eukaryotic elongation factor 2 kinase-like isoform x2|GO:0004674 GO:0005524 GO:0006468 GO:0009069
MPVAQAIAMADSERRGSMEDSDSVVMEPITLADIVRNRNLRRSCSEDENDEQIQVNPHICFSAAMERRKSRAKIEQQQQQQLRMRRLLAWKHAIMKARAMGDPWEKFHLDEYPTEKARRYRYSALRRRWITDDVVVKMEYQPFSHGAMRECYRLKKLSNFTRSSDWKGDANNYVAKSYMENVDRSVYFQDVQLQMDAKLWGEEYNRHNPPKKVDIFQMAVLEFVNREGSPLFHVEHFIEGHYIKYNSNSGFVQDDQHRQTPHAFSHFTFERSVHY
>TR219977|c3_g1_i5|m.79944 | eukaryotic elongation factor 2 kinase-like isoform x2|GO:0004674 GO:0005524 GO:0006468 GO:0009069
MPVAQAIAMADSERRGSMEDSDSVVMEPITLADIVRNRNLRRSCSEDENDEQIQVNPHICFSAAMERRKSRAKIEQQQQQQLRMRRLLAWKHAIMKARAMGDPWEKFHLDEYPTEKARRYRYSALRRRWITDDVVVKMEYQPFSHGAMRECYRLKKLSNFTRSSDWKGDANNYVAKSYMENVDRSVYFQDVQLQMDAKLWGEEYNRHNPPKKVDIFQMAVLEFVNREGSPLFHVEHFIEGHYIKYNSNSGFVQDDQHRQTPHAFSHFTFERSVHY
>TR223055|c3_g3_i10|m.82948 | elongation factor 1-delta isoform x1|GO:0005840 GO:0005853 GO:0003746 GO:0006448
MTSPLTEEKIWFNKHICEEAERQYYESQAKLLMKNGIIPRPTNLCLPATEQLPSIQMPKVTQKTEKKPPKQDIVIPATEKLITAPAADTLPPSPPLTPKKDDPQTPKGKDAKDMKNEADKEGMKKKRKKDKSKKKLIEEVIEKPNGMPPTPIQSSLAAEVAKARWHIKQSLEFMDGVAVAAGASTDVLNRLASLEIENADLKKGVSELRNLISSLEVRLKNMEIKPAPAPAPAVAAATKTAPPTASAPQPAKPAKKEEEDDDDGVDLFGSDSEEEDEAAKKVREQRLAEYAARKSKKPVLIAKSNIILDVKPWDDETDMVVMEKAVRSVEMDGLVWGASKLVPLAFGIKKLQISCIVEDDKVSVDDLQETIQSHEDYVQSVDIAAFNKV
>TR225202|c2_g1_i1|m.84360 | transcription elongation factor spt5 isoform x1|GO:0005515
RGMGMRRDQGLIGQTIKITGGPYKGNVGIVKDATDSTARVELHCTCQTISVDRSHIANVGVPNKEGSYSTYNRGTSYGITGIGGNTPMYGAKTPMHGSQTPMYDAGSRTPHFGSMTPSHDGSRTPGQAGAWDPTVTNTPARSASGGDFDTFSLDDDNASPSPGYNLSTPGYQPETPQGPYTPQTPGTMYGSDHSYSPYPPSGSPSPSGYQGTPSPSAYVPTPSPGGGSGTGRGDGSGSGGYQTSPSPSAAYGTPSPLGYSPMTPGASSPYNPQTPGAGMEQVALVEWHTTDIEVRIKDTHDDPGLTGQTGVINGISGGMCSVFLPEEDRVVNIVSDHLEPIVPQRGDQVKVIMGEDREAVGQLLSIDNQEGVVKLTQDEVKMLQLRFLCRMKSSRGRGSSASASGD
>TR232496|c0_g1_i1|m.88796 9acarelongation factor 1-alpha os=tortonia ad560 gn=ef1alpha pe=3 sv=1|GO:0005525
VPPKRPTDKPLRVPLQDVYKISGIGTVPVGRVETGIMKPNENVTFAPSGLTTDVKSIEMHHESIQQAQPGDNIGFAIKNIAVNQIRRGYVCGHTKSDPPKESEFFVAQVIIMNHPGQISNGYAPVLDCHTAHIACKFEEI
>TR233158|c1_g1_i2|m.89147 | negative elongation factor b|GO:0005634 GO:0045892
MPGTGLEDVGVPGQSFLRDALTSCTDPLKAIEEFQLENGILLPSLRSMLPLLDLHGVRRLDFHTSVLEELRDRLIQHINEIGQKEGRDRDKKLKDLLAKSFPVVRVKSLRPVVMCILRNTPVIEDKYLKILVKDRELYNDTDTEVKRQIWKDNQSLFGDEVSPLLSQYIKEKENVLFDQENLTNLFFSSSPKVRRQGEVVQKLAHMIGSSVKLYDMVLQFLRTLFLRTHNVHYCTLRAELLMALHDLEVQDIISVDPCHKFTWCLDACIREKNVDIKRSRELQGFLDSIKKGQEQVLGDLSMTLLGPYVINFLATSTMKILHHLINNESMPRDNT
>TR235581|c1_g6_i8|m.91817 | transcription elongation factor spt6-like isoform x2|GO:0003677 GO:0006357 GO:0032784
MADFLDSEAEESEEETELDNYEKKKLKKMRAMESDDDEDDEEDDEERIREELKDLIDDNPIEESDGDDSDGSGGSKKRKKGSDDEDDFDDRLEDEDYDLIEENLGVKVERRKRFKRLKRFQDEESDEEKGEEKEDERDAIANELFEGSDHDDERASERGPRTDPERFDEEGSEGEYSETDDFIVDDDGRPITEKRRRRKVTCSNAALQEAQDIFGVDFDYDEFEKYDDEYEEEDEEEEDEYIDDDEGEDAPRRRRPKKAVQRKTTKTSIFEIYEPSELKRGHFTDLDHEIRVTDIPERMQLREVPVTSVPEGSDELEDEAEWIYKQAFCRPSISSQDGPRGNDNQERLKKGPLTIGKIKKALEFMRNKHFEVPFIAFYRKEYVQPELNINDLWKVYKYDEKWCQLRSRKNNLLKLFEKMRNYQLDQLMKAPDAPIADNVRVMKDEDIDRLKNVQTVEELKDVYTHFLLYYSHDFPVMQEAWRLKQKEAAAERKSRSMKKKQKKIKKIMVDGETGEERVEEDGEEEEDGDEEEDEEDGEEEEGEDEVEDVLESETLKRAVRSGPYAICRKAGLDGLAKKFGLSPEQFAENLRDNYQRHEVEQDPVEPGEIAREYSTTQFSTPDDVLRAAKFMVATQLSREPLVRKCVRETFFERAKITVRPTKKGMKEIDESHPCYSMKYVKNKPVRDLSGDQFLKLTLAEEDKLIEMTISEQIDGITSSSYIEEVKQLYYRDEFSKNVQEWNALRVECVELALTQLLLPVLRKELQARLLAEARDSVLRSCCRKLYNWLKVAPYAVEFPDEDEEEWDTGKGGTQTRVMAVAYVPDLSQAAFACLLTPERDCSDYLRLPHLLKRKDTWREDQKAQKVMTVMRPNVIKWAQGVIIHMLTVNMFNVALVHGTLFCLLFLFSFKYF
>TR58363|c0_g1_i1|m.5154 9crustranslational elongation factor-2 os=daphnia magna pe=2 sv=1|GO:0003746 GO:0003924 GO:0005525 GO:0005840 GO:0006448
DNDNKRSFNMYVLDPLYKVFDAIMNYKKEETESLLTKLNIKLTLEDRDKDGKNLLKAVVRQWLPAGETLLQMIAIHLPSPAVAQKYRMEMLYEGPLDDEAAIAIKTCNPEGPLMMYVSKMVPTSDKGRFYAFGRVFAGKVCTGMKARIMGPNYTPGKKEDLYEKAIQRTV
>TR75450|c0_g1_i1|m.6293 | elongation factor ts mitochondrial-like|GO:0005840 GO:0003746 GO:0005515 GO:0006448
KALVESNGDMELAVENMRKSGLAKADKKSGRTAAEGLVTIKISDDAKSAVIVDVNCETDFVAKADDFVAFAQEVAAALLSKTVNTEEELLALTLADGNTVDETRRGLISKLGENITVRRFKQF
>TR7890|c0_g1_i1|m.684 9cruselongation factor-1 alpha os=scapholeberis mucronata pe=4 sv=1|GO:0003924 GO:0005525
TSDIACWKFETSKFYVTIIDAPGHRDFIKNMITGTSQADCAVLIVAGGVGEFEAGISKNGQTREHALLAYTLGVKQLIVGVNKMDSTEPPYSEARYEEIKKEVSSYIKKIGYNPAAVAFVPISGWHGDNMLESSANMGWFKGWNVERKEGKAEGKTLLEALDAILPPSRPTDKALRLPLQDVYKIGGIGTVPVGRVETGIIKPGMVVTFAPCNLTTEVKSVEMHHEALEEAVPGDNVGFNVKNVSVKELRRGYVAGDSKSNPPKGAADFFAQVIVLNHPGQIGNGYTPVLDCHTAHIACKFAEIKEKCDRRTVKTTEE
>TR86057|c0_g1_i1|m.6725 | elongation factor 1-alpha
VEMHHESLPEAIPGDNVGFNVKGLSVKEIRRGNVCSDAKNDPAREATSFLAQVIILNHPGQIGNGYTPVLDCHTAHIACKFSEIKSKIDRRTGKELEEEPKFIKTGDAAMITLIPTKPLCVEIFQEYPPLGRFAVRDMKQTVAVGVIKQVDKKQPKK
