# Supplementary material for: Transcriptome profiling with focus on potential key genes for wing development and evolution in Megaloprepus caerulatus, the damselfly species with the world's largest wings
Source: PLoS One. 2018 Jan 12;13(1):e0189898. doi: 10.1371/journal.pone.0189898 (PMC5766104; doi:10.1371/journal.pone.0189898)
Supplement: S3 File — (FASTA) [file pone.0189898.s006.fasta]

HOXL subclass (Hox genes and Hox-derived genes)
>M.caerulatus|Scr|Hox5|ANTP
TKRQRTSYTRYQTLELEKEFHFNRYLTRRRRIEIAHALCLTERQIKIWFQNRRMKWKKEH
>M.caerulatus|Ubx|Hox6-8|ANTP
RRRGRQTYTRYQTLELEKEFHTNHYLTRRRRIEMAHALCLTERQIKIWFQNRRMKLKKEI
>M.caerulatus|Antp|Hox6-8|ANTP
RKRGRQTYTRYQTLELEKEFHFNRYLTRRRRIEIAHALCLTERQIKIWFQNRRMKWKKEN
>I.elegans|Pb|Hox2|ANTP
PRRLRTAYTNTQLLELEKEFHFNKYLCRPRRIEIAASLDLTERQVKVWFQNRRMKHKRQT
>I.elegans|Zen|Hox3|ANTP
PKRARTAYTSGQLVELEKEFHFNRYLCRPRRIEMASMLNLTERQIKIWFQNRRMKFKKEQ
>I.elegans|Btn|Meox|ANTP
PRKERTAFTKGQIRELENEFCHSNYLTRLRRYEIAVSLDLTERQVKVWFQNRRMKWKRTK
>I.elegans|cad|Cdx|ANTP
KDKYRVVYSDRQRLELEKEFHYSRYITIRRKSELATALGLSDRQVKIWFQNRRAKERKHL
>I.elegans|Scr|Hox5|ANTP
TKRQRTSYTRYQTLELEKEFHFNRYLTRRRRIEIAHALCLTERQIKIWFQNRRMKWKKEH
>I.elegans|Ubx|Hox6-8|ANTP
RRRGRQTYTRYQTLELEKEFHTNHYLTRRRRIEMAHALCLTERQIKIWFQNRRMKLKKEI


NKL subclass (ParaHox genes)
>M.caerulatus|Nedx|Nedx|ANTP
KKRPRTAFTAAQVKALEAEFERSKYLSVSKRLHLSKTLKLTETQIKIWFQNRRTKWKRKY
>I.elegans|Hex|Hhex|ANTP
RKGGQVRFSPDQTTALERRFGGHKYLSPEERRILAQDLKLTDRQVKTWFQNRRAKWRRAS
>I.elegans|Dll|Dlx|ANTP
MRKPRTIYSSLQLQQLNRRFQRTQYLALPERAELAASLGLTQTQVKIWFQNRRSKYKKMM
>I.elegans|Dr|Msx|ANTP
NRKPRTPFTTQQLLSLEKKFREKQYLSIAERAEFSSSLHLTETQVKIWFQNRRAKAKRLQ
>I.elegans|H2.0|Hlx|ANTP
RSWSRAVFSNLQRKGLEKRFQLQKYITKPDRRQLAATLGLTDAQVKVWFQNRRMKWRHSK
>I.elegans|Ems|Emx|ANTP
PKRIRTAFSPSQLLKLEHAFEKNHYVVGAERKQLAQSLSLTETQVKVWFQNRRTKHKRMQ
>I.elegans|Nedx|Nedx|ANTP
KKRPRTAFTAAQVKALEAEFERSKYLSVSKRLHLSKTLKLTETQIKIWFQNRRTKWKRKY
>I.elegans|NK7|Nk7|ANTP
KKKARTTFTGRQIFELEKQFEVKKYLSSSERAEMAKLLNVTETQVKIWFQNRRTKWKKQD
>I.elegans|Vnd|Nk2.2|ANTP
KRKRRVLFSKAQTYELERRFRQQRYLSAPEREHLASIIRLTPTQVKIWFQNHRYKTKRAQ
>I.elegans|Scro|Nk2.1|ANTP
RRKRRVLFTQAQVYELERRFKQQKYLSAPEREHLASLIHLTPTQVKIWFQNHRYKCKRQA
>L.fulva|Nedx|Nedx|ANTP
KKRPRTAFTAAQVKALEAEFERSKYLSVSKRLHLSKSLKLTETQIKIWFQNRRTKWKRKY
