# Supplementary material for: Transcriptome profiling with focus on potential key genes for wing development and evolution in Megaloprepus caerulatus, the damselfly species with the world's largest wings
Source: PLoS One. 2018 Jan 12;13(1):e0189898. doi: 10.1371/journal.pone.0189898 (PMC5766104; doi:10.1371/journal.pone.0189898)
Supplement: S4 File — Included are representatives of the wing-patterning gene network and the four signaling pathways: Notch (N), wingless (wg), Decapentaplegic (Dpp) and Hedgehog (Hh), and pigmentation genes. (FASTA) [file pone.0189898.s007.fasta]

Selection of wing Genes
>TR212227| adenomatous polyposis coli -like isoform X1|GO:0005634 GO:0005737 GO:0008013 GO:0000281 GO:0006974 GO:0007026 GO:0007050 GO:0008285 GO:0016477 GO:0030178 GO:0043065 GO:0016342
RMTNSATQTPQEGSNSANTAAAGGGNGGGKSACESECSEGGKMIDQEDMQGSKQQNSVGSLYHGAWPMDRSLWHSGPSSIGGGSINNDMASVMSFTSSVGSMGGGTAFIGGMGGMPMEGAASLPDGAARRSYSQQQLGAKVEMVYGLLSMLGTHDKEDMSRTLLAMSSSPDSCIAMRQSGCLPLLVQLLHGGELDGATRRRAAIALHNVVHSHADDKRGRREARVLRLLEQVREYCDSLSRDSSNGQRSWQQRRGRSGGTDSNMSDSLGVDGGQTSPPPAMQEDVERHPGTTIAALMKLSFDEEHRHAMCQLGGLHAVAELIQVDHEAHGSTTSDHYCVMLRRYAGMALTNLTFGDGTNKALLCSFRPFMKALVAQLESPSEDLRQVTASVLRNLSWRADAASKQTLREVGAVTGLMRAAMEATKESTLKSILSALWNLSAHCSMNKADICAVEGALAFLVEMLSYKSPSKTLAIIENAGGILRNISSLIAVREDYRQILREHECLKVLLQQLKSPSLTIVSNACGTLWNLSARCGDGEDQRALLDMGAMSMLRSLVHSKHKMISMGSSAALKNLLSAQQPQNQQQSQHQSHSHHHSHHSHHHHHSHATQLSEDGLPSLQARKRRALQQELDQTLAETCENIEPSGSPPPLSGSMNTPSSLPISCASGLISSSPHLLPSPDANDASAMSRSTSLTSRRSRHRQQIPTRVGQPVPRSESRESVTSTRSDSACVGRSGHGVVRQHSLPPNGRAWEDSGLPCRRQRREEAGSEATVEDSVERQERGRLPEPSYGNMGERDCCSAPPQQRAWSSVNGESVPSLKNGEDYRRRPSKDESVPRGEARPSSGMDSPSNNGNRQFSEHKTSYSPLPFHPDNKGRYSPHKSASPHSKYSDYVYVEDEVQDQPVDYSLKYSEDGTPTMEPKKADTDKAATSQDARKYPACVKQCGPGRIRRIPVHGNESSIYGVYTETDLDNPDQPTNYSLRYAEGEDPELGSKGSAALMPPPASAGVGSHRESESSTMYYDRTSASVHDDTVMTYCTEGTPYETPCNFSTATSMSDLRETAPTLENVQEEPSGSKEIKKEKVDDQSTLTSVPPKVEAILPGECSGIKDEKEFPKEKPQHQLTPAPTSMPQCESSGLLTPEKPVQYGVEGTPVCFSRVSSLSSLHSVDARGSEPVSEKVCVPDEIIQGSPTSSSGLVQELPKTPSASPGSVSEQVVPGYQEVLSPGGQECGLGVVSRIPKGIVSPSGCGSQDSPKVPSECGRSPVVPTCARDLKEEMRPDREGGKVVTFGGADHYAEETPLMFSRCSSLGSLSSFEQHSIHDDRSSVISDFSRRTSGVVSPSELPDSPTQTVPSSPRHSKAPVDFTTRIAEGNVAVRAQSQSIPMLRHGAGRPIQNKSSVFEDDVAAFKEEDTPIEFSTATSLSSLTIDDEPKISHDASLKEVTTKCSDDVREGAVDLGQCRSTIESLHAEESPQGEAVEGGEEEISAGSQEAAAACPSGSTAIGPGDEDDEGMEKQDTEKEKREDGELAPVSEGEEGDENDEDMLAACINIGMQNNRHRQRQYNNNKNILRAGRFGAIANMRGRPSGIPVKAAGYPNPVFGLSAIPMPVLRQQQERPSNCRSSQDNARAVSHGKAVGYGEVPAGPCEDAVSTYCTEGTPANISHAGSHSDLSVLSLPDQMRDGDDTEERGRSVQREHCSRDLANEEIRGLAEGEKNKDLDSPTVPMTTPPTPLSAGSHHNAELSDDSSSFSGDNDNILAECIQSAMPKARPQHRRPQQPPMITPPTQIRRKGPILAAGPRRPAGVGLLCGPSMHHAQGAPLQHKYGIPHPRVQEIVPQSRIQRDEECEQRCGPTQDGGQNYQKAMRMPMYSAARDEMETYATEGSPNTFSNATSLSDLTINSSPEGAACLRNLRRMVPSASGGATGHATTEGSPLCDTPVRYATEDTPLEISHAASLSSLSIGDDDDDEPKASSNSGSPKHGKGGSPHRSMLPRPVTVGHSDPSSEGRPGSSNGGDDNSEAGRGATYSSGRQKTSSLSEEVVTVLSRNGSLSSLSVDSLGAEPTPSEQALLEQCIHSAMPKSKSDLGGGARGVVLAARRPLGGNPPVHSHQMGPLHGAEAPSLPSVPMHRFELCSRAWEGGDVMDHPEYAHRSIDERLSAAMGAELVSKNVLGSAAATPAVAADEAVEDATKHTEGNLLPHHHRQEEGMVTITERLVEASSMGEGESKMEITHQEMPCPRAPAVGKEIDCFLQIIEKDADSSPESSPGMVETPSSGGENLTTGESPSEGPSDSVCGTKETASSTGSTRDSGSGRGQKVHDMKQSFGSNTWNEDSPNSVSFPSISISAPLISSFRSDLGATQGGEANVSELEEIDRAPSSDEVERVPSGEEDRLTESRLIELEAGRLAVAVGLAPEDCGNLDSIGPPSGMGSIPSLNTSLSGALDGNGFSGENIHNGASRESPEDGIDEEKKQFPAPKRFECRHTARRTLTTLVRRALGSNNFDDLSAASSSCNSHLENIKPPSMMDEVDMENSMVSVASITSEVADGGSSGNGGSGNGHSNNGKVGSDGAGSGGSGGSAGGSFFELIRPAAAMAEAYAAHVAAYTMSCSMRTSSGPSLSECLENVNPPSTFDELTDPTDKGESTIEPGTETIGSDTEEIGNEDGGAQNADLLDGSEGTATPGRSDEGGSAGSTPKKKRESRRLTPKQRRQLGKERFRTYTIGGEPAGEEEDTTEVNASEIVEEIYGDDEVTATAEAKAKTPKQRRQEDRERFLTRTLQPEEQLDKANLLIGGERFEEHEINEGSDVFGNKGMHKPAGPKTLKQKRAEAKERFQTHTISESPSNNDLNAENFNFEGCLELDITAEELEVLKRDANLVVSSINATRKTMGSESSASDEPPLIDCETLSLVSDESDTESGERDAKMNVINNHVVTNEVEYNETSSSGSDDDIDEEGNRLPKVKGPRIVKPEAMGSEDGQKDATENLQDSPKPVRGRRRTLYSSPSKTQRKTSSPSPVSSRKQSPHSQIPVVAAAAAPRNSNLPLKVRPTRASALRQTRGGSPRRPTRPGKVSSSSSPSPAGSTITSPKVGLNSVRGKRVLPKASPVTRSNFSPTATPQQAKCNQQELIHSKNLANTEVQPVEDPILTAPPVKQGTFTKEKPSTQEDLASTPSKIASPTKTRIPLPASGGEDTDQKKKSGIPASKIASAGKLRQPTQLSRLSKTPSQDSATSRGSNSSGATPRALHKAATMPVRASNHVKLSQHARKGSFSSPPTGIKTSLSNHSLQGNESSIGGNSLTRAKGLAGSRRPASVAGILANGTPKSGSSSSLNSASSIGGPKEGSNPGTKKKKEVTSKIANLWKKVEESRSRQNEKKDNRVWITNGNVTEVNQEVSQAAGSIKKSSESYKSQIVQPRLKPNATCAPNSNHCGNGEGCADIEDSGDACQKNTVVLRRKPGRSTNEESSEEKAKRLSRLGSFVRIETEAGVSTPQPSKPQASAIVPPFNYSPPRRPSSGNQTNVTGSRSFIPTSAKNMSSPLSGVKRNPPFSEIGREPVSNGMVHQEEEMTTSSMRVTTV
>TR179931| armadillo segment polarity isoform X1|GO:0004871 GO:0005515 GO:0034333 GO:0007165
MVAALVRAISNSNDLETTKGAVGTLHNLSHHRQGLLAIFKSGGIPALVKLLSSPVESVLFYAITTLHNLLLHQEGSKMAVRLAGGLQKMVALLQRNNVKFLAIVTDCLQILAYGNQESKLIILASQGPVELVRILRSYDYEKLLWTTSRVLKVLSVCSSNKPAIVEAGGMQALAMHLGDPSQRLVQNCLWTLRNLSDAGTKVDGLEGLLQSLVQLLSSGDVNVVTCAAGILSNLTCNNQRNKVAVCQVGGVDALVRTVLNAGDREEITEPAVCALRHLTSRHVESEMAQNAVRLNYGLQAIVKLLHPPSRWPLVKAVIGLVRNLALCPANHAPLRDHGAIHHLVRLLLRAFQDTQRQRTSVASGGGGTGNAGGGGGGTYTDGVRMEEIVEGTVGALHILARESHNRAVIRGQLVIPIFVQLLFNEIENIQRVAAGVLCELAADKEGAEMIEQEGATAPLTELLHSRNEGVATYAAAVLFRMSEDKPHDYKKRLSMELTNSLFREEQNIWNGGELGMGPDLQDMLAPDGIYAPSSRGYQPQGYDAIPVESMQGLEIGGGGE
>TR180532| Axin|GO:0016055
GGEEGALGGPIVTGPLPTVHEDSELVTGGDSVQCSAPGGAPSSQLDPLLPLTRDMLLVTQNSRAMELRPKPEAYAGLYLRQQGMLPSPYYHLNLASPTPTPSHHSRHHRLHPHASHIPAHLLQTSTPHPHLQYSSYNPVSRQDSELQSLSSDAHTDDTMSLTDSSVDGMSIGGSHHRLSKKQYIRHCKQIKESANLNRDPCMHHTVIPRTQRIQKEQVHPMKPEEFAAILIEKLETVRRKQEAQEKLDRKLQEGEGASGTEDSCGAIEGMACVGGFGGGAMTVASPRTLADAIREKLQLTTDDSDQAILDQHVSRVWSDLTPSRSPGALSSPRPRSPDGSGRKRGTLSAMPGSLLGSAAVSSHCSAAGLTSLPPSSGSGVSLLPPHPYQARPSYCPRHSRKDKDVFSTFSSDSGNVHDFPSDAGGGGSLGAIGPPNELSLGLPGMGRQQQQSSLQPHHYLPKSKSMPDYGDVQKGQDLLYSPATGVHDGRFARPGKEVDRRRSSSSKKTLTELTDSGVSVVSDTPTSTLHAPSTNAHSKERVLSWLLESEKQSSCGGSGGGGGSHSHVSDRDSSSKHRMRSSTCATSPISSRRGKKSVVMYNSSSRSGSLERASGSGTVAQNTGICSSGVSGGGWGGGHSPAQPFVADPCMPPLPLPHTPTQLEEARRRLEDDFRPRNSAGGNNSVPQVPLTRQRFSSSGKGGHVEGVIGSA-SGTAITSVSNPSTLRKGRNTSRSSGGGVGPPPPSGEGSAGPEFTTVVFSFCDEQFPYRTKIPGRQLTLKHFKEYLPKKGSYRYFFKTECEDLDMKVIQEEIMDDNEILPLWEGKVMAQVKPID
>TR166194| segment polarity dishevelled homolog DVL-3 isoform X5|GO:0016055
MMEETKIIYHIDDEETPYLVKLPIAPERVTLADFKNVLNRPNYKFFFKSMDDDFGVVKEEIIDDDAHLPCFNGRVVSWLVSAEGSNVSDGTSQCTESVAHSDVKVPLERGLEVQPPPPFQ
>TR158015| Kinesin costa [costal2]|GO:0003777 GO:0007018 GO:0005874
MDVPIQVAVRVRPLIYQGRNHDIVCLSTPPLSNQIVVGDGNVFKFDYVLPIGCTQSQFFNTAVGPLLGFVLEGYNASVIGYGQSASGKTYTLFGPGLHWALSESEYGVVPRATRELFHQFGELPERNFLVKVMFLEIHEDVVCDLLNTSQFQQDITISEDQHGGAIINGAEEAVCQNVMEVFNCIHIGMSNRHTNVSSITNSSQCHTIFILTLDQQWEVGNGMIQHRTSKVVFTDLSGPERMYSNQGTGNWYPGIVRVDPGLTALSNVVSVLGEPMWQNHKTAAPYMESNLTKILRDSFGGKARTLFVCCLSPALLDIDESLNTLRYATRVQNIINHTTMNVCLYSNQIRGMNTNCSSNSRLTVGNKSTNDEIFGLEFAALQWMKLVSNAEGLFKKMVLNESLNAEEKEQIQLWLCLKQECDECVGRDESLVLGEIEEVTQRSLGKIDELTESGEKTDATGDVNQNTRISSARNEVFSIDSNQDLSQYASEDESDVNAQTPDFLDKLDEYMKVFKEKTDSFIWDTIESLQFKISDELFALSASVEKEVEAVGRLNSSSDDLLAKLKSPLGVSQLNSLNTRRHSIHPGAVDAEMRNIAKALAKKDFRESLPSHVDMVSDSNCLEDEGKNTGKRKSPSLLEADPSPEVRALGVATVKDVAVPKLPDGGMCDPTKELKLLAANKEAHQSQIRQILLDLQGAHRRIEELQSTICIKEQFIADMIKNSETRASAKHRFERKIHKLEEDYFQAKVKLAQAEKTYAQATKGSTRFVSKEDEIKYKKDVEKYKKLADRYEQRLRDVENIKQLAGGSAKKVLELEHSLQSSKRQMEKLKKQLQKEEKNKQCLEQELMEDQKKIKDLEQKYADQTLLLNKKTSTEMVEEDRLRWIQEEEERIVSMRESSKRFQEQLLQQQSMLEKRETFLKEKLALEKQKSKSLHKVSARILHLDDIMKEKSTYMEKTANQDEKEALRHEIRNLRRTRDCLTNQRYKLDEKYQKEKTLTSAEERKLLELDEALEAIDAAIEYKNELICGREDKLGCVKKTGIEDEDLLMARLMSLSPMETRTLLYKYFQRVIDLREGGRKMEVQIAELDSQTETQSWKIHALSNALQQAYVERDQRIVLMQKEHQERVHLLLRHFAEESSGGSGADSSALWDLKNQLVKSKRENKHLKKRLLEVESALQMTSGAYETRALHLESAVPQHSLIKRLQAPGAVSIPTTKVTRERNKLIIQQRKPNRS
>TR218199| transcriptional activator cubitus interruptus isoform X2|GO:0035301 GO:0003676 GO:0046872 GO:0006355 GO:0007224
DTNGTTPRGDYTCLPLAPEYLAVGGIASDILHHPPSTVASAELPFHAMEASGIASPRGHGGLRQSRKRSLSASPYSDSFDINSMIRFSPNSLASLVNGSRSSSASGSYGHLSAGAISPALGMHPSVAPHLQHLQAHLFRSGALPPSSPFLSRSAQAGLGMSQSTHAATRHHHHHHDIMPTLNHVQPEAVAREKETLQAERTSSPSWAHPVSSTVGEDEEMLCGGGRGRGVKSEACDGGEEPGDFVETHCHWKECDREFPTQDDLVKHINNDHIHTNKKAFVCRWCECSRNEKPFKAQYMLVVHMRRHTGEKPHKCTFEGCAKAYSRLENLKTHLRSHTGEKPYTCEYPGCTKAFSNASDRAKHQNRTHSNEKPYVCKAPGCSKRYTDPSSLRKHVKTVHGADFYANKRHKGDAGGEEGMPPGTEGEGGSPARSSDACSIKTGASPSLKSEDADSPGDGTVGPEAADPNFMNEGSLPATDSLVAALGVRESPGEDDGDEDTIGQGASLSPWAEFLEEPE-QLSNITLEIGSVAVVGTSCGVEGGDDKGGMQEIILRQGGSGGPQSGPLQTGIRAGVGRKLGKAGVGGLLYSPVFNAHPPHCGGGVSGPEVATAVARPAEYHGTMLPASARGSHPLNRVRGGQLIMDQMADARRDSGSTTVSSYYGSMQGSSRRSSRGSQVSTASLSRPWRSSVFNAMPSSAAPGGPPSSSSFYDPISPGSSRRSSELSNHFDSSPNMSNALGQQRKDSRDVDLNAVDPYSCLNSKDQRQAGMQRRNPNCQMHGMAPPHVGRLNMDGAPPSGDPFLTSNLVVQTQKMSLCGQQSVGDISAIPHQRACQQANNSPRRSFRPEATRTASMPEVESAGTVATAAVVPSLTEGGRHSGLPEHHPNREVMLEEVGEGEMVENKLVIPDEMVHYLSQVADSGVNGDSETKKESTDFRQNTCPQSNGTRTGIQPVDSNQQEVSPGMASNNPISPESAVRDPCPPSQDVHAQHQVHTQELCMPSNDRVEPFAVPTPHVIAESELTPQEMPCNIPKNHSHPENHHQCNPSQNYIPQDNHCTHTWMQAPRWDMHHRHNGVQCPPNSTVYGNTHGTCPSMSNQRMTTWNAQGCWGGKWEGQDCGMQSRQNDNRNGGQGWNGPHPMARECVDISYCDSDSHRRSELMRAHYQQYVPSPHQNGAMGCMHWHGGVEVENRSANRNQRAAMPCGAHCQGGRCWTPNMNPQMMRGKPVVANHSHSQNGEGRRMCEVVDHQTSQEQFSSNRPAPEIQCRDISQSSTMNVSVGQSRTSVGIEPPPGGMRPEAYQRTLEYVQQCRSWTASSHNMEGCTPANITLSPDCDSAVTSSTEAGSRIPGGAGYRDATPQGCTASQGVMPVNKPCGNSSVGGGNCLLQTSNMVINDMTSSLTSLLEENRYLQMMQ
>TR23365| decapentaplegic|GO:0008083 GO:0007165 GO:0008283 GO:0040007
AQHQARKHKRRDGKENCRRHQLYVDFADVGWNDWIVAPPGYDAYYCHGDCPFPLADHLNSTNHAIVQTLINSVNPSAVPKACCVPTALTSISMLYLDEDNKVVLKNYQDMAVLGCGCR
>TR199155| decapentaplegic|GO:0008083 GO:0040007 GO:0007165 GO:0008283
MRGFDLLHLSLPLMVLLALFASTLTDAKESTSAPASSASKSSDQVVQAVESNLMKLFGFTRRPRPDRRKIIIPDAMVELYNSLQGGREASDEDEEDQEGHHSSGFHLPGLHTGTANTVRSFTHVESQVDDTFRSHDRFRLHFDISSIPASEQLKAADLRLSRNRSRRESSGPSSAIKSSTSSPFPSSSSSHEAPSSTSPEPSSPKTSRRRRRRRLLHVLVHDIVQPGLRRTRSGSPREPILRLIDSKVVDTSESEDIILDVLPAVERWREIPKANHGVLVEVVPYGSGSPSSSPSS
>TR216899| neurogenic locus delta|GO:0016021 GO:0005509 GO:0005515 GO:0007219 GO:0007275
MMGISNIVAAVACFVTFGLFLQVSASGVFELQLSSFSADSMRCCKSVPRDPSCDCTARFRVCLKHYQARIDNSSPCIFGSFLTPTVDLSGDNNAHGDGGILEEPILFRFDFAWPGTYSLIVEALNGSASANDTNQTLLARLTTQGHLEVGAAWSRVDARSTGEATTLPSGDVLLGGKSSIRFGARVTCNAHYYGSGCANLCRPRDDNFGHYTCSAAGDRVCLPGWEGDYCSTPRCLPGCHAEHGHCNKPNECLCHSGWKGPLCDQCERYPGCLNGGCVEPWNCICDEGWGGLFCNQDLNYCTNHRPCKSGGTCFNTGQGSYTCSCPPGFGGTDCEKRVDPSPPAAPSTTAST
>TR9571| Neurogenic locus delta|GO:0005509 GO:0005515
HGYCTKPLECRCNEGWTGLICQTPSWAENCHRERGYCRKPGECRCKVGWWGKNCDQCYPYPGCIHGTCNRPWECNCEAGWGGMLCDQELTYCVNNKDLCENGATCVSLTEEDGNYRCLCKEGFTGRNCEVTTVVSTEQPITSS
>TR165074| epidermal growth factor receptor isoform X1|GO:0004713 GO:0005524 GO:0006468
MGSVKTYLFVVLCALSCVVVTGRGGKKSEFVKGKICIGTNGRMSVPSNREHHYRNLRDRYTNCTYVDGNLELTWLQDEDLDLSFLQYIREVTGYVLISHVDVRRIVLPRLQIIRGRTLFKLSVHDEEFALLATLSKMHNLELPALRDILQGSVGLLNNYNLCHVKTIDWEEIITGPNAKKIYVYNFSNPERVCPPCHHTCKKGCWGEGPENCQKFSKINCSPQCYQGRCFGANPRECCHLFCAGGCTGPKQSDCLACRNFYDDGVCKQECPAMQRYNPTKYSWETNPNGKYAYGATCVKNCPEHLLKDNGACVRSCPPKKMAVNGECVPCDGPCPKTCEGVKILHSGNVDNFRDCTIIEGSLTILDHSFAGFQQYDGDFIFGPRHGSMHPDRLEVFSTLKEVTEHVNIQASHPAFTNLSYFRNLEVIGGRALTELMSSLYIVKSSLKSLGLQSLKKIHSGSIAILENKDLCFAEGINWEKIKKSNDHPTYLQNNKPSAECQREGLVCHSQCSSEGCWGPGPDQCLSCANFQVDNICIESCNTMPGLYRAGPKLCMHCHEECESTCHGPGPGNCTKCKHVKDGPFCTVTCPDSKYNDNRSSGQSGGECKPCHENCVDGCSGPENTIGPDGCHSCEKAILNGDVSVERCLQKNEPCPDGHYYEWVGPQDQGPLKPLAGKAVCRRCHPRCKKCTGYGFHIQVCQECVSYRRGEQCEDECPPDHYARDDTQECLPCSQECRGCYGPTASDCIGCRNYRIYQDGAPDSNSTLFNCSGFCPPEAPHKIFPQDNIEPYCSREPLVLTYQSGDAENTPIILAVVLVFAAIAVVCSVVLGIQWRMKAKAKDNAVKMTRVLTGMDREDNEPLRPTNVKPNLAKLRIVKEAELRKGGIMGYGAFGTVYKGVWVPEGENVKIPVAIKVLREGTGANTSKEFLEEAYIMASVEHPNLLQLLAVCMTSQMMLVTQLMPLGSLLDYVRNNRSKIGSKPLLNWCTQIARGMAYLEDKRLVHRDLAARNVLVQTPNCVKITDFGLAKLLDINEDEYKAAGGKMPIKWLALECIQHRIFTHKSDVWAFGVTVWELLTYGGRPYESVPARDVPELLEKGERLPQPSMCTIDVYMIMIKCWMLDAESRPSFKELADEFAKMSRDPGRYLVIQGDRLMRLPSYSP----QDEKELIRNLSSAMDGPEALVDADEYLQPKSRAPIAPSSLTVSASLGPPSSSSLGSTSPPHTPIKKWSGTAGMCPMAHGNPVVDMAMAGIGLPQGSSISTSDEAGNHATVLPSDSPTPQNLQNWDRELRYGHNMDVHDGRPQGPLHSDGSSSRYCSDPLKMLGRDCDTGSDDCFNPGTNKREAQVGNLKLDLPLDEDDYLMPSPQLNQGTSPYMDLIGDSKITENGEPRNGGFHGYPDFLPATGKIKTSVDNPEYHIMNQNGNGPTPEVAIPSCNAEVEGVSVMPPVQGQPHVNGGIVGSGVPTGGPPYLTQQKSSEEESDHEYYNDFDRLQRELQPLKPFRRNETTV
>TR165277| Extracellular serine threonine kinase four-jointed
DGKAVVLTQFVDGLGPAFIPPLLRGGDKRMHPPDVKTLVRDGIRASSLADLQLNASHGDASLSTTGTALSPALLKQLTELAQWSDLLVFDYLTANLDRVVNNLYNLQWNPAMLDSPAHNLARLHGAAPNSLRPTTPEGSPLGEGHLLFLDNESALLHGYRLLPKYERYHASLLDSACVFRRSTADAIRRLRAKRPEVGDALRRSFQNFDPEFRDVLPFLPEKSLKILNLRIERVHEHIIDCQRRYESRARQSARKDGS
>TR209935| fringe glycosyltransferase|GO:0016020 GO:0016757
MLASPSRMLGDIVAEGALDARSSTMRTKRRAAQVALLLVATALYGGIMSSWGSAGAGGTPSIEDRWQERAPRSIAESSASQQVKPEIGGKARSSHKGSQAIDTTTVPPTARSPTTSLDDLFISVKTTGGFHRSRVQLVLQTWFNLARSQTWFFTDTNDVEFQEKTGGHMVNTNCSSSHSGKALCCKMSVELDSFLESGKKWFCHVDDDNYLNVPRLVRLLSGFDPQRDWYIGKPSIRAPLEILLPQALASGSATSKKAARKVSFWFATGGAGFCVSRALALRMLPVASGGKFISIGERIRLPDDVTMGYIIEHILGHHLTVVDEFHSHLEPMRFIPEESFPEQITFSYSRYGKEQNVLKIEKGLPVKDDPTRLLSLHCILHPSAKYCLR
>TR233104| Frizzled- partial|GO:0016020 GO:0005515 GO:0042813 GO:0060070
MACLWSWNRLYFTRRTLSLTLMVMFISITSSHPSSASSSSSGAGGMTSRITDRDSLPHHGRCEPITIPFCRDIQYNETIMPNLLNHQKQEDAALEVHQFFPLVKVRCSTELQFFLCSVYAPVCTILDRAIPPCRSLCISARTGCEGLMNKFGFQWPEGLDCAKYPESGTEICVGENTTSSESSGSGSSGGSGGTTGHPHHTHNPHLTSVMGGGGIDTSVWNGIRTIAGIPDYGSGTFGFPTVPARDYGFVCPPQFKVPKGLDYVLKVGGRTERDCGAPCEGMFFTAEQRRFARLWTGSWSLLCLVSCLATVLTFAVDPGRFRYPERPIIFLSGCYAAVALGYAAGFALGDSAACRPPFPPPAEQLSPRLKMASLITQGTKAEGCTLLFMLLYFFSMASSIWWVVLALTWFLAAGLKWGHEAIEANSQYFHLAAWAVPAIKTITILAMGKVEGRHFKRNPNFILNNDSNNANISSGSFNFRYLFERL
>TR176957| fizzy-related homolog|GO:0010997 GO:0097027 GO:1904668
MMNYEYQKRLLRQQNSSIPCANTSMSTNSENAPVVPQRLNICSPKKERYSDRFIPFRTGNNWVTKFAMISDGQRGSGPAKKARDNGEGGRDGLTYSCLLKNELLGAGIEDVKGQSDERRALSPTEGKNLFQFSSPSKQDDSYTSLLSASLSPVSGKSQKLLRSPRKATRKISRIPFKVLDAPELQDDFYLNLVDWSSQNVLSVGLGSCVYLWSACTSQVTRLCDLSHDGNSVTSVSWNERGNLVAVGTHHGYVQIWDVGVNKQVNKLMGHSARVGALAWNGEVISSGSRDRIILLRDVRTPSQVGERRLTGHRQEVCGLKWSPDNQCLASGGNDNRLYVWNLHNLTPVQTYTEHLAAVKAIAWSPHHHGLLASGGGTADRCIRFWNTLTGQPMQCVDTGSQVCNLAWSKHSSELVSTHGYSQNQILVWKYPSLTQVAKLTGHSYRVLYLAMSPDGEAIVTGAGDETLRFWNVFSKARSQKVMLSVLNLFTSIR
>TR7115| deadpan|GO:0046983
MPISEDELDHKGPPQGHHGYHHPHQHLQNYAHPPTSGMSKAEQRRSNKPIMEKRRRARINHCLNELKSLILDAMKKDPARHSKLEKADILEMTVKHLQNMQRQQLAVAVATDPTVLHKFRTGFNECAE
>TR170037| Serine threonine- kinase fused|GO:0004672 GO:0005524 GO:0006468
MEKYKVIKVVGEGSFGRVFKAEEKKTSRIVAFKVISKHGRTEKELKSLRQECEIQRHLHHPNIIQMLDSFETENEIVVVTEFAGKELYTILGKEGYLPEHRVKEIACDLVSALYYLHSHRVLHRLKPQNVLLHSEDGGAKLCDFGFARNMTTGTHVLTSIKGTPLYMAPELIDERPYDHNADLWSLGCIIYELLVGSPPFCTTSILHLVRLVCHGAINWPDFISESCKDFLQGLLQKDP
>TR160013| hairless isoform X2
MRVQDSSTSASCAKMTEEMNKNGGPEVNTGRKKGFGPSNANGSESPSLSIPNDTESCKTVSGGRLKFYKDGKFILELSHRKDGERTSWVPVPKKTCWPLPSSASSTTMAVPGSTPRQESSASLSVSDDNSSVQSSPWQRDHGWKQGTPRHGISKEMSFIMQPLKRTGQLKKLRRSHPVRKRRRRPHSPSDVKAQDISDVVSVASKVGPRPKLLDLVESLWKKYGGLSDGVARTSGASVTHNHVIKSESGGGVVAGGKLDPSLVSPRKRILREMERVSLEDHATSKRHKSRSSALVECRKPPVNASSNSTCQMQRLKPVDEVPSPPPPTKGADRLSNYSISSLLGKATEKDNGGEGEPSPVLRSLLRSPTRGGSNSQDCHSPSPISEVAPQGLTAGRGGGKVPSPRHRHASPPSVPYHHPQHSLPHHHHVPLHSPRLPSPPMLTNPSSPPHSRGLSRPSMASLSSSSSPSSSPSSQHMPFLAPPALFPGGGLFSAPPSSLAPPAFLSPHHASSLAHPYYATAAGLPSGMRQPYRSTPSPVPSLWLHNYGMPSLPVARTGDAIASRSLYPGVMVGPCHSPMGVMPPWQSLVPHLQEDYKRDDGNSDAPLNLSKNAG
>TR1245| hairy|GO:0046983
MEKRRRARINNCLNELKALILDATKKDVSIKFLPPLLPLPFSRFGVIRSQLGSQTLKTSAVFFSLSHLESASYFPLNVLLKLPDYSSLLLRSGFFAVPSAEEALTERPFKEFIFQESLHNLSE
>TR219975| indian hedgehog B -like|GO:0008233 GO:0007267 GO:0007275 GO:0016539
MWTRRWFAFFWIPAVVMLTACCIAEDSSGPAEDYIMLYDQYDEDGMPNIIPENGPDIIFDRERRVNMTKYKYSRRLWYINCTRRRRCHCYSRHLRQYFCCACDSGPCFPGDSKVILMPSGNLIPMHQLRIGQYVQAANEDGKLVSSKVLGFLDKRPNETAPYITLTLASGHAVSLSANHLLYVTALKNSTDVNAKRSSNTIPNHPVYAGQVQLGHYLFIPQEGQLRADAVVGINYGFKLGAYVPLTEHGSIIVDGALASCYASFPHWLSHALLTPARYFPEILLDTEDSQDSHGLRTFPSILKMVGHTLAKIKVVNNYKSNDIVRLHAFDENFLSPSL
>TR155102| homeobox homothorax isoform X2|GO:0003677 GO:0006355
ADSTSHTDGASTPDVRPPSSSLSYPGPGVNEDARSPASGGTPGPLSQQPPGSQQSADNNSEAGKWCPTRREWSAGDARTPGAEARRGVLYSSVFLGSPDDHADSCSRFGDASNASIGSGEGTGEEDDDAGGKKNQKKRGIFPKVATNILRAWLFQHLTHPYPSEDQKKQLAQDTGLTILQVNNWFINARRRIVQPMIDQSNRAGKSALEWY
>TR159567| neurogenic mastermind isoform X1|GO:0016607 GO:0003713 GO:0007219 GO:0045944 GO:0005667 GO:0045941
VGQVGPGGMGDVLQPKRQAVVDRLRRRIENYRRRQTDCVPRYDTTFHGLCEQNVQETLMLKQRFLETKAKRAAKKSDKKQHDSSGGNLQGNVHAXQKFLKRTAEELEPPGGPGDAFEPPSKLHCSGPGHPQQPHQHPHQGQGGPSQPHQSNQQGPPHHNHLNQGNPQQQQQQQGQQQGPPGPGQGQQGQRGGEGLTKFSVEIVQQLEFTTSTANSQPQQIST
>TR217237| mothers against Dpp|GO:0005622 GO:0005515 GO:0006355
YRDNLKPKPGLNQASMDSEEAESSGSGPMSSLNSLFSFTSPAVKKLLGWKQGDEEEKWAEKAVDSLVKKLKKKKGAIEELEKALRCPGQPTXCVTIPRSLDGRLQVSHRKGLPHVIYCRVWRWPDLQSHHELKPLEHCQYPFSAKQKEVCINPYHYKRVESPVLPPVLVPRHSEFPPGHSLLPFQQLPEPSMPHNVSYSPTGFSQSQPJPTGSSHGQQSQVGGGPNSPVSSVPSPGSTASNPQSPFGSNGLAETPPPAYSPPDDSQPSPTGDQAMDTNNLLSEVA
>TR158777| Neurogenic locus Notch|GO:0016021 GO:0005509 GO:0005515 GO:0007219 GO:0007275 GO:0030154 GO:0050793
MQCCVLVSHITREILTQSNLLCIIYFHETVNISVHIMLRKPTQVYGRCVSNNYQISYRNMLRYRSFLQGLRPCWCFYGRSLKSLRGLPATDPLVFSLPFAAAGTHCEREDHCASTPCKNGAECTSLADTFECTCASGFVGPACEKDIDECRATKPCKRGECINTHGSYSCVCHPGYTGRNCELQYIPCDPSPCLNGGSCRQVDTLNFKCDCPVGFEGKHCEINIDDCPGALCQNGGECVDGVNSYSCRCPPTYTGEYCEVDVDECMQRPSLCRNGATCTNTIGGFSCICVNGWAGPDCSQNIDDCAGAACFNGATCVDRVGSFYCRCTPGKTGLLCHLDDACTSNPCHADAICDTSPINGSYTCSCASGYKGIDCSEDINECEQGSPCEHEGICVNTPGSFACNCTQGFTGPRCETNVNECESHPCHNDGSCLDDPGTFRCVCMPGFTGTQCEIDIDECQLNPCLNGGTCNDLINAFKCACAPGFTGNRCQTNIDDCASNPCRYDGICIDAINSYTCKCPPGFTGTNCEVNINDCQSSPCHRGECIDGENSFTCSCHPGFTGRLCQTQIDECASNPCQYGGHCEDLINGYQCRCKPGTSGHNCEVNVNECYSNPCRNGATCVDGINRYTCECVSGFTGSHCETNINECASSPCANGGNCIDLVNGFKCDCPRGYFDDRCLSDVNECASHPCVNGGTCRDGVGRFTCICPPGYGGARCDVDIDECASNPCQHGGKCQEKGIGMYACICPPGYTGTRCETNIDDCASAPCKHGGNCIDLVAGYRCICDAPFTGEDCSQRLDPCNPNRCRNGARCSPSQDFLDYACACPLGYVGRLCDEDVNECLANAPCRNGATCINTNGSYRCECARGYEGRDCLTNTDDCASFPCQNGGTCLDGIGTYNCLCADGFGGAHCETDINECESNPCHNGAECTQYVNSFTCSCPPGFSGSTCMTNDDDCTESSCMNNGQCIDGINNYTCVCEPGFTGSNCQYRINQCDSAPCKNGGLCQDHGGRFFKCRCPYGYEGELCERTVDWCSANPCANDATCNQVDNTFSCLCGPGWTGGLCDVAMISCRDAANRKGVSVERLCNNGTCEDVGTSHRCRCLDGYSGSYCQKETDECASSPCQNGATCKDLVASYSCVCPKGFQGRNCELDVDECRPNPCQNGGTCHDLPAAYSCSCPPGTLGMICEINVDDCAPGRPGHGACHNNGTCRDRVGGFECDCPPGFVGPRCEGDINECLSQPCSPQGTLDCVQLVNDFLCNCRPGYMGRRCESRIDICERSPCQNGGVCSPLDVRRYQLPGTLRRHPFPPPTHSCICPEGYHGRNCEFHGQGCESAPCRSGGTCMPDTVGSGGRGYVCLCPTGTTGSLCEIDSLNECDSNPCRQGGVCQDGVGDYICLCPPKWAGKDCDVYDQNFAGGVGWPLKKRIGHEEIAGGGGRRTTTPAPVLRFDFDAALERERQKCYEMGCRERAGDLRCDEDCNKYACDFDGGDCSLGRNPWRNCTAPIKCWEVFMNGVCDPVCNNPACLYDGRDCENSLHPCNPNYDAYCQQHFANGHCDYGCNNAECNWDGLDCEATQLPDLAEGVISIVMLMDTGSFLKNRVPFLREVGHTLRTNLRLKKDDQGRDMVYPWTYKPSDSRQPLQYDAGTIGVIVYLEIDNRRCVLIEGYTCFNTAKEAADFLAATAATHTLSTSFPIVQVRGEMGHGDGPGDDEARPNVKLIVLGVVAVLFLAFIVGILAKSQRKRAHGVTWFPEGFLRNNSGQRRRSRRRGPDGQEMRNLNKQPSCIDVGIDGMGGVVGGMGHLSGPQPHLHPHLHPGLPPPPMHGANPDGGPVAHWSDEGEDEDEDGDSDHLHLAPPKRPRAADSHGPVGAGYASDHTVITEYEDSEPRIGWGMGDPGTVLTPPSLDGSHQDMENRVPPGMTPLMVAAIRGGVGLDTGEEGEEGDGSSGGGEAAAAIAELVAQGAELNATMEKTGETSLHLAARYARADAAKRLLDAGADANAQDHTGRTPLHAAVASDAMGVFQILLRNRATNLNARMLDGTTPLVLAARLAIEGMVEDLINADADINAADNGGKTALHWAAAVNNVDAVNTLLAHGANRDAQDDKDETPLFLAAREGSYEACRALLDHLANREITDHMDRLPRDVAQERLHHDMVRLLDEHVPRPPTHHHHHHTHSQAHAVAGNGSILPATSVANSTGAPSRPTVVGGRIGGAGGGSKSKKRPKATASPSSPGEGDAGIPGGASAPSGAVVRRKPSTKKKRPSASEAQRAAETAAAASLSSGSPSSSGASPAHSLESPPSLCSPRTVGSLPDATAATPGPFDGAAGAYAVAVSSVGNGIGNTSVPGMTVPAKQPPSYEDCMKAVAAANAAQEGQYYGAYQAVGGAPPPPPPPPQQQHLRVTSPTGGQVGSYLGSPPPAQQVPRQPSPAKARPTGHVALLRAATHQQAMASMAAGTSVGPFGDFPTEAAAMQQQQQQPPHPSNAGVPHHQPQRPNVDQGRPPSPVSSGPGPGSQQSTPGGKQESDPIQSILRLLEGRSNGNPLVNQPQVEPVWGGPFAVQSWLAQAAAAGSQVGAPPGQLISQGVTPGSGAPISLWDLQGKDVKTEQQILEEQMRAEEERKKEEIRKQEEAAAKKKVEEEERKRKQLEEELRQKEAERRHLEEQMRQLEEEKRAEEQRRKEEERRMAEERRRLEERLRQEQELKQKLIAEEKKLQEMKRLAELKQKKEEAEERKRKEKEEEARKQLQKELEAEEEKQKKKQEEERKRQQQLQQQQQQQQQEEVNRRLEMQRRLLEAQRKAHETQNAT
>TR220514| notchless homolog 1|GO:0005515
MDNDSCSRRVLSRFKSESGEIVGNLIDLPLDISVDKLQLICNALLQQEDDAPFAFFVNDKEITNTLGSAVDVNTLNTEHVLDIVYQRQAVFRVRPVTRCTSSIPGHAEAVTIVNFSPDGQHLASGSGDTTVRFWDVKTQTPHFVCKGHKHWVLVLSWSPNSSSLASGCKSGQILLWDPITGKQKGKQLLGHKQWITSLCWEPFHRNPDCRKLASSSKDGDVRVWDTLLGTCLLVLSGHIQGATCVRWGGTGLLYSASQDRTIKVWRSSDGVLCRTLEGHAHWVNSLTLNTDYVLRTGPFEPALAFRNRASGSTCENXEEMLKKATDRYLAVCPNEGDERIVSGSDDFTLFMWQPEKEKKPLARLTGHQQLVNDVRFSPDTRILASASFDKSIKLWDGRSGKFLCTFRGHVQAVYIISWAADSRLLVSGSADSTLKVWNVKKQKLELDLPGHADEVFAVDWSPDGLIVASGGKDKLLRLWQR
>TR179806| palmitoleoyl- carboxylesterase NOTUM|GO:0016787
GWYCYDQMSCQNRWLRLKYFMTSKQWAETRNVGGILSQNPEENPYWWNSNHIFVPYCSSDSWSGTRPQPHRWSHQSDSTVKYAFMGSYIVQEVIRDLLPLGLAQANSLLLAGSSAGGTGVIVNLDRVADSLAELGYGNIKVRGLADSGWFLDNAPYTSVSSSPSSSTFASSWLMTSPAQAVRKGVELWRGQVPERCRQDYPEEVWRCYFGYRVYPTLKAPLFVFQWLFDEAQMIADNVGPPVTKDQWNYIHRTGDSLRKTFANVTGLFAASCISHTVLTKRDWQTIRLGNVSLPQTLHCWEMQQHHNSKIKHAEARKSHHHQHHYGMSGQHHGHGHHGNHQKHGLGGHGHGEYMQRSPEREAGLEEGGDTLEGGWNQELPHASHLRRKNIASELKWKQENSQARNPLLSYAGNREITAPTWNPIIYTAGGENSTVLGGMPVSSTVKYAKNIIKSSMNRMPPAVPTFHSASLQPTAPSSSPVALDDRSP
>TR174327| optomotor-blind -like isoform X1|GO:0005634 GO:0003700 GO:0006355 GO:0005667 GO:0045449
AAAAAAAAAAQGPMRPLRGIQPEDDGVVDDPKVTLEGKDLWEKFHKLGTEMVITKSGRRMFPAYKVRVTGLDKKAKYILLMDIVAADDCRYKFHNSRWMVAGKADPEMPKRMYIHPDSPSTGEQWMQKVVSFHKLKLTNNISDKHGFVSTTILNSMHKYQPRFHLVRANDILKLPYSTFRTYVFKETEFIAVTAYQNEKITQLKIDNNPFAKGFRDTGAGKREKK
>TR203817| patched|GO:0016021 GO:0008158 GO:0007165
AAASVTVQLFDITWRLKDLCYSPSIPSFDYHYIDQIMENIFPCSIITPLDCFWEGSKLLGPDYAVTIPGIGSTVRWTNLNPEKMVAQMKEFNLLFPFDTLEEFMKRAGISTAYQEKPCLNPRDHECPETAPNKQSGQAPNVGAELTGGCYGFAAKYMHWPEELLVGGATKNKTGHIIRAKALQTVVQLMGERELYEYWSDDYKVHHVDWTQEKASLVLDTWQRRFSEEVKRLMSQKDNSTSPYDLLAFSTATLDDILSRFSEVSITRIAIGYVAMLVYAGLSLLRLRDPVRSQCGVGLAGVLLVGATVAAGLGFCALLGISFNAATTQIVPFLALGLGVDDVFLITHAYGDQLAGRSDLSPEGQTGTVLKRTGVSILLTSLSTTCAFFAAALIPIPALRVFSLQAAILVLFNLAATLLVFPAIVSLDLRRRRSGRADILCCFVPSPGPGYSHP
>TR187930| rhomboid isoform X2|GO:0016021 GO:0004252 GO:0006508
YMFVHIGYAHIWMNLLVQLALGVPLEMVHGWWRVLTVYLAGVLAGSLGTSISDPYVLLAGASGGVYALITAHVATIIMNWSEMQFAPLQLLVFFVLAAADIGTAIYYRYIEPVDRQIGYAAHLAGAIAGLLVGIQVLRNLEVRRWEHVIWWASLVLFAVLMIAAIIWNAAFPEYFPPPQKESFE
>TR161758| inactive rhomboid 1 isoform X1|GO:0016021 GO:0004252 GO:0006508
MFSHSMLFLFQVFFDRPVSGHTARSADFTDGGGAGGSTGVGHPSSEAGPSGGTGVTSTFASESTNRDQMDRTRDLYARERGASWRRGTPERIPSEAHVLGAVPSASQSAAEGAGTAATGTESYAEVGMSRITSFVLDRALDNSDRRQYGMGVVGRFFRRSVRRSVVEDRKVREQLDDMEDHRPFFTYWATTVQVLVMIISLVCYGFGPIGFDLHQRSSLVLVTSLSLQQVDYMEPSNFWIGPRAADLIHLGAKFAPCMRKDYKVMKEIEKAREKERETACCIRNDDSGCVQSSQADCSVRGLRPTTISTWKKWSAGDSGPGGRISGSVCGLDPKFCEAPPSVAPYEWPDDITKWPICRKTSSIPQKFKYKDKAAEHMVCEVIGHPCCIGIHGECRITTREYCDFVRGHFHEEASLCSQVSXXXXXXXMIPFYNPEVPDQFYRLWTSLFLHAGLLHLMITLVVQYFLMRDLEKLAGPLRIGIIYLGSGVGGNLASAIFTPYRAEVGPAGAQFGLLACLVVEVLHAWPLLRHPGRALMRLLLATATLLLLGLLPWIDNYAHLFGFVFGFLLSYALLPFVSFGGGGSGLPFDRRRKVALIWVCLVSATLLFLLLVLLFYVVPVYDCEACLLFTCLPLTRDFCAEQNIDFKRDYHT
>TR191046| transcriptional enhancer factor TEF-1 [scalloped-like transcription factor]|GO:0003700 GO:0006355 GO:0035329 GO:0005667 GO:0045449
AIYPPCGRRKIILSDEGKMYGRNELIARYIKLRTGKTRTRKQVSSHIQVLARRKLREIQAKLKVNPNPNSTSLPCTFQPAQDQAAKEKALQTMSSMSSAQIVSATAMHNKAAAAGLATLGLTSPVSYPGAQFWQPGLQPGTSQDVKPFASQVGGYGVSGGGGAGTLGVVPGSKPSATAVSSSVEVGAIAGGVTGGGAMPGAIGGLLSGSSASQAPAPPPWEGRAIATHKLRLVEFSAFMEQQTDTDTYQKHLFVHIGSVTYADSLLEAVDIRQIYDKFPEKKGGLKELYDKGPQNAFFLVKFWADLNTNIQDEAGAFYGVTSQYESNENMTITCSTKVCSFGKQVVEKVETEYARFENGRFVYRIHRSPMCEYMINFIHKLKHLPEKYMMNSVLENFTILQVVTNRETTETLLCTAYVFEVSTSEHGAQHHIYRLVKD
>TR178981| serrate RNA effector molecule homolog|GO:0000166
MAALKKRVAIFLEFLESGRLGSVTVDADQSEGLVRLLDAVVIRLEGGTAVDLRALEHPPENLNNQGHSQQASSNQVTAGSITAPAVATGTTEGTSGSTVAPGEPSPPGVVPAKEKSEGSIGDKPEDSVKQEETALKQDNGMETEPIIESQIPLPSKPKPKGRGKKRKREYDFESGGSDDDDDEDKDDDDDDMDEDDDGGDEEPVPPGMEDEPPPPGLEGKEDDEEEEEKEDEDEYEEVKQKEEENGDKSEGREDGEEDDDEDDEAAKKEASGMEEEPKKEEPKEGDDVERQTPRPLHKTSSIFLRNLAPTITKQEVEAMCKRYPGFLRVAIADPQPERRWFRRGWVTFERSVNIKDICWNLNNIRLRDCELGAIVNRDLSRRIRTVNGVTSHRQVVRHDIKLSARIVHNLDAKCGLWQDEEDDNSVNECGNDKEEKKVKTKKNSGKQQKNDSEIPSFGLVSHNPVLKNITDYLIEEASAEEEELLGLSNSNSAANASGGSSAAAGDQEEGQLPADDVAVSHPTVERDEILIKVLDRLLLYLRIVHSVDYYNHCEYPNEDEMPNRCGIMHARGSPPSSKVTQQEISDYCRTFEQKIASFLQPTVKLTEDEFSKLGAKNPDTEVEKFIIANTQELSKEKWLCPLSGKKFKGPEFVRKHIFNKHGEKVDEVKKEVEYFNNYLRDPKRPQLAEHPGNRPGRKEAIMSSGGPGDREAYSSQAYMPQYDYAYGYGGGGGRHFTNSYGSGGYGGYGRDSYVRGVDGYARSNPRAYNRSRVVSQTDYSNRPIIAYNDLDMPDDKEFF
>TR161777| smoothened|GO:0016020 GO:0004888 GO:0005515 GO:0007224
MKAGLIHVFVTAVIYVVGVSSLALLDETIGTSSPTTNQLEAQQKSPVLPASLDPKTFDHTTTPSLPVTEAVRPRLKTSKDRPAAESPPLPPYPIDRFSHGDKIVGSKVVGGGSARVKAGNYCTRPATCEPLEQTACLGAKLPYEHTSSGLVEDALSQAEARERIHEWEQSLRWVPRCWAVVQPLLCALYFPRCDNSSVHLPSQEMCRLVMGPCRIVRMHFGEWPDFLQCANTTKFPPMCKNDLREVRFNGSGRGCPHPLVSTEDKNSWVEGVEGCGVGCDPPLFPPDEQAQIRNLLGWAGSICAAFNLFTVLTFLIDWRAANRYPALVIFYINLCFLVSTGGWLAQFVGSGARNDIVCRKDGTLRMSEPSAGENLSCVIVFVLVYYFLMAGIVWFAILSYAWHISFRALGKVRERVDQRGAYFHLAAWSLPLVLTIAAMALGEVDADGLTGICFVGRTSPFPRPPSPPPSMATASYSTFGSSLAYAQLAQDRGGTPTSRAVFLLAPVVIAVAVGGFFLTKGLVTLVRLRVTSKDLISERAGARIREAIVRLALFSAFALLFALLTLVCHAYQMQNRDKWALSLHRYVVCKVMKEGGSAGESALGLGGDMASGGVAKALSELLLEWNRIDGIPGGAGACRFESRPSLAMVQLHILAPFAAGVVMSSWVWTSSTMQAWRRFFRRVCNSRPVDEPVRLQKHKVIARAFAKRKEFDQGGRLSISFHTTHEDPVGLEFDLNSVGAASGDLSSAWAAALPHLVMRRGAIAGGTGLGMGGPNSFSSQVRRNSMDSEISYSVRRLSVESRRHSLDSQVSVQISEVKARATTATPLHLGLMGGNIRSVGGWLRGGTRAPPQRKRRRKVVPAAATHRRGSSTSQESQLGAEVLSALGVVHPQYTRNFDAIENKENSFPKQLSDTAKLAVMASFPFTLPGQTTSEMSADEDDVKDALDSALAPNQSLKDSQGKGTDDRKRDSGLLGSLKVPKKPSSASGDHHSSAQEVSEGEGERPRVVVNGPTCRYLRGRRSAIVESTADDILKSGGGHNGRGLLSKNSEDNSLLSRSSGKSSKKNSRLSSELNPKRDESHLLEKLLSSSMEDVEASLKGHLDTSHSSRCKEVSTQTSMELLLGAFLSPSVLLKQLSAQRQSIETDEYNGSPPLKPLHVTRRQSKLTLSDAATSDCMSSSREELEELVGHDKHRAPVIIPKSEKISLSKDKRSKSADAGEDSIDYRAKLDFRKISLQ
>TR119349| homeotic spalt-major|GO:0003676 GO:0046872
MAHTPLPATGAPLPPRPPITSAGLSLAQVGASSSQTAQQTAASILASTIITNSDPPPPPTEPNTLEMLQRRAEEVLDSASQGLLGHGLADELASASGRKGGSGKPSGGLSPRSEPFFKHRCRYCGKVFGSDSALQIHIRSHTGERPFKCNVCGSRFTTKGNLKVHFQRHTAKFPHIKMNPNPVPEHLDKFHPPLLAQLGPPPPPPPPPHSMHPHHINPFASATFQPPPNQ
>TR211792| homeotic spalt-major|GO:0003676 GO:0046872
LTPRGSSGGGGGSGSVGGGPAGGGGGNVGPLSGLGGGPHHPPVFSAFGLMPPSSGSPLMTSALSSLTSSVLTSTAFSPMALSVGHGGRGNTTCNICYKTFACNSALEIHYRSHTKERPFKCSICDRGFSTKEITELLDPLNPNAQANHGVCNSCQRRIQGFNGSGGGNLQRQLPPPARPRPKRRKRAGEKVPRLPPLPMGLPVGYAPDWNPWLGNMKQHMLTHKIRDMPPHLFEASSRSPSTGSQGLPMSEDANHHGGSGSNGSLSSSMQPDDIGSIGDVKSTPGPVALDGSSIKRPPESEGTLPVPKRPP
>TR185040| Suppressor of fused homolog|GO:0008134 GO:0005667
SAVVFQLKMEEREKVISRSIPQNVLPPTPLGLEALYSACKNLYPDQPNPLQVTAVVKYWLGGPDPLDYISMYANPGVPEKDIPPHWHYISFGLSDLHGDGRVHDVPGPVVPGSPSGFGFELTFRAKREPEETAPPTWPAALMQALAKYVFNSENTLCVGDHVSWHCPLDGSESRIRHMLMAEDPQLPTPLETPYGSVKFVQIVGVCAEELKAAQRWNGPGVIEILRRLPGAGGPWLVTDMRRGETMFELDISALEEVEHGIETDGSNLSGVSARWCAWTEDTSFAVTSSPMCSPPPSMHSTSSHSDPLHEKLLDREIKREP-RSDSPTWALEPPKISEPESRQIKEELQRGLDPKPAVPSVDRPFIKQGDSEDESTRLRGSYDRESAGARLLESTELLRVRRLEGVHITLNLEAACILPLALRGRVKHGRHFTFKAALGDDAITLVAPSVTGTLVDAESPYAAHGGWLQLLIDDQMVEKMGEAFDKLIKLSPESGSEPIESDTAENEVKMCLPQTFIWSEHKLAITVVPDKF
>TR181498| Suppressor of hairless|GO:0005634 GO:0000978 GO:0000982 GO:0006355
MHMIPDPLGSTHDAVNGEHQDSHQRHQYNNAVVARGNHGNHSRGISLVSSGYLMGGSAGPHCGMVQMPPSPVRTPSPVPIEQFGSLLRPGKDQRLTRDAMKKYLRERSDMVVIILHAKVAQKSYGTEKRFFCPPPCIYLYGEGWRQKQEALLKSGESEQGSQLCAFIGIGNSDQDMQQLDLNGKQYCAAKTLYISDSDKRKHFMLSVKMFYGNGHDIGVFYSKRIKVISKPSKKKQSLKNADLCIASGTKVALFNRLRSQTVSTRYLHVENGNFHASSTQWGAFTIHLLDDNESESEEFAVRDGYIHYGSTIKLVCSVTGMALPRLVIRKVDKQMALLDADDPVSQLHKCAFYLKDMERMYLCLSQERIIQFQATPCPKDPNREMINDGASWTIISTDKAEYQFFEGMGPIRTTITPVPIVHSLHLNGGGDIAMLELTGENFSPNLKVWFDDVEAETMYRCQESMLCVVPEISAFCGNWLWVPQATQVPVSLVRNDGIIYATGLTFTYTPEPGPRPHCPSTDQIMRSGGRNSHPS
>TR153309| Wingless [Wnt-16-like]|GO:0005576 GO:0005102 GO:0007275 GO:0016055
RAVSDGARRGIQECEQQFRNERWNCTTRDGEQSVFGYILERGSKETAFIYAVTSAGVVHAVTQACSSGNLTECSCDGTRQGHPTPEGWKWGGCSDNLQYGVQFARKFVDAPEREKSKKAWSTRMKMNLHNNEAGRQVVSSLMRMQCRCHGVSGSCELKTCWQTMPSFNEVGDTLKRKYRLAVQVATKNKKHLRRKNRSKKQLPVSKGDLVHIHKSPNYCVEDPQKGIPGTAGRICNKTSNGPDSCDLLCCGRGYNTQVMKHVERCHCKFYWCCYVKCKTCETQIDRHTCK
>TR180532| Axin
GGEEGALGGPIVTGPLPTVHEDSELVTGGDSVQCSAPGGAPSSQLDPLLPLTRDMLLVTQNSRAMELRPKPEAYAGLYLRQQGMLPSPYYHLNLASPTPTPSHHSRHHRLHPHASHIPAHLLQTSTPHPHLQYSSYNPVSRQDSELQSLSSDAHTDDTMSLTDSSVDGMSIGGSHHRLSKKQYIRHCKQIKESANLNRDPCMHHTVIPRTQRIQKEQVHPMKPEEFAAILIEKLETVRRKQEAQEKLDRKLQEGEGASGTEDSCGAIEGMACVGGFGGGAMTVASPRTLADAIREKLQLTTDDSDQAILDQHVSRVWSDLTPSRSPGALSSPRPRSPDGSGRKRGTLSAMPGSLLGSAAVSSHCSAAGLTSLPPSSGSGVSLLPPHPYQARPSYCPRHSRKDKDVFSTFSSDSGNVHDFPSDAGGGGSLGAIGPPNELSLGLPGMGRQQQQSSLQPHHYLPKSKSMPDYGDVQKGQDLLYSPATGVHDGRFARPGKEVDRRRSSSSKKTLTELTDSGVSVVSDTPTSTLHAPSTNAHSKERVLSWLLESEKQSSCGGSGGGGGSHSHVSDRDSSSKHRMRSSTCATSPISSRRGKKSVVMYNSSSRSGSLERASGSGTVAQNTGICSSGVSGGGWGGGHSPAQPFVADPCMPPLPLPHTPTQLEEARRRLEDDFRPRNSAGGNNSVPQVPLTRQRFSSSGKGGHVEGVIGSASGTAITSVSNPSTLRKGRNTSRSSGGGVGPPPPSGEGSAGPEFTTVVFSFCDEQFPYRTKIPGRQLTLKHFKEYLPKKGSYRYFFKTECEDLDMKVIQEEIMDDNEILPLWEGKVMAQVKPID
>TR219982| polyubiquitin binding domain of nemo
MQKLHTIIVSLMAVDPIRCKELKEEVLNLRKQISDDADKLQEQRGHLHDAENLLTDLKLGFDTIKAKEASVSSAIKENADADYHKAQARGYQQKLDDVTARLTQSEEALGNARSEVVSLAERLRRSETQLEEIPILKTQVEVYQSDFNTEREERARMAADKQQLVEEVYRLRARNQQLIDDMENLERRGAQENRSPPDGIASTTTAGGVYPRMHVFNTLAAPGRGSHQAYTNAEPEQRQATPDRSTRVSSEPELYTCPKCFKAYMELGPLEVHVNQCLDTP
>TR148092| cut |GO:0003677 
FRFLDSGPGGPMGGLGGLVGGVLGLGESLIPKGDPMEARLQEMLRHNMDRHASQTLDTLGISRRVRELLSAHNIGQRLFAKYVLGLSQGTVSELLSKPKPWDKLTEKGRDSYRKMHGWACDEAAILLLKSLIPKKGQLSNNREDDLAAMNEFGGHMHPSQRRVLNPKTHHSMPHHIAPIRFPMPAVRIKGKDTAGIPGFGSARGGVGGLGEDSMTEERIVHILNEASHAMKTASASLHGVVLGGVGGGNGGGGQEDSRSNDDSKSPHHGQSSSPLLSGNGSGKDGSSSQNRRLKKYENDDIPQEKVVRIYQEELAKLMGRRLEDSMRSPRDHHFPSLLFPHFFSGAGGPGGNAGSGGSTGHPLMDRTQEE
>TR178422| isoforms A H I S - protein pangolin, isoforms A/H/I/S-like|GO:0016055 
GSGHHQHPHVGLPHHSHHHHHHPHPHLHPAIVATGPKQDSEQNHRPPGMDQKNATTSSTDGSKSQDSGQADKKKPHIKKPLNAFMLYMKEMRAKVVAECTLKESAAINQILGRRWHALGREEQAKYYELARRERQLHMQLYPDWSSRANSSRGKKRKRKQETNDGGSNLKKCRARYGLDQQSQWCKPCRRKKKCIRYMDGGEDDGGQSTDDGGGGGDPMGSVGSAGDEAKTPDSEDFPDTPPQHQSHHNPFPHHPQLGVVVGNHHHNPHPLHLSHPFPHPLQHPPPPNALRGYSGASSDVGGLSSPGGLSLASPAGLSLTSPGLTSPPPSSVPLLPSPGPSSLASPALSLASPAVSL
>TR151876| Rap1 GTPase-GDP dissociation stimulator 1-B|GO:0005515
MADELGKGLESLCLAVEKKSDNIHVLLESLISTILRSGDALGGPTLNTLLDQLGIILASSRKGLQSIEAAKAIAEVAKCDAGREACLKHPTLINALLALLCLPETPVLEQESASIRATLTQACRALGNICYENQDGRKLILESDGLATLVNVLKWSITPPKGRSGSGEASLSSEAPWIGASRQLRNVSAGFLMNLLINQEEKQRKTLEMGIMDILCAFLELDAGDEEVTNHVLLIVGLLTDCDSEKELMSARLCRAVVYVLGASESPEVCEMCLDLLHGQAENETVKVHLAHAGLCETLIGLLRKHQPLLSEDDESRNVMKVACDLIVLILTGDESMNHLYSEGNGEVFQEMVRWLESDDEDLQVTGVLAMGNFARTDKHCIQMVQKGVCKKLLNLVQKNNTSKGDIRLQHALLSALRNLAIPPQNKGGLLEDGLVECVLPMASIPTFPVVFKLLGTLRMVIDGQERAAATLGNDKALVARLVEWCATDDHPGVQGEANRLIAWLIKNSKQESVMNTILDAGGLPFLVNMVTAEHAVMQNEALLALTLLTATLVSEESVADGLQIADIGNRIESLLTTGRKKKSNDDGKEGNMPEDVKRDELKVLQTEVILNALTLIGELIKSEKLKEHLKGSGIKQVLHSLTEDRLKKQAQQLTKLLDSG
>TR217271| rap1 GTPase-activating 1 isoform X2|GO:0005096 GO:0051056
DRVTPPALGAASRPKIETDDTARVFRRFFLAKEHSNLWAEDPLLGPVVLSLKMEMIPLANCASSPSTSNPAQEHVRIVLRTKSGTRHELLPTSDCEGSSLSPAFLARVLNADLTTEKYIPAASPRSSELIAAYDERSLVTTFKFGVLYQRFGQTAEEQLFANRVSSPAFDEFLHLLGKQIRLKEHTGYRGGLDIQFGQTGEEAVYEVFKERELMFHVSTLLPYTENDPQQLQRKRHIGNDIVAIVFQESNTPFTPDMIASHFLHAFIVVQVIDPCTSNTRYKVSVTARDDVPRFGPALPTPAIFRKGPEFKEFLLTKLLNAENACYKAEKFATLELRTRASLLGSLVEELRLKSQEFLGGDCSVTLNSNSGAKCDNSVGSSGGGNGGAGSRFIDTVRKVLTQRSRNHSIESNIIASGGSGSSQRSGSMTGRSNQTTSTPPSTGSRNGTVVNRRKSGEEKDGRWGSNPSSPVSSPDIPAHHHHGSHFGGSHAFQTQQQRVALSESDDSSLNSIEMEGNVGVCRHRSGISVVEVIGVGGTSGGGDSDTGLESLSSADIPQKNLSSSCKYCSEEREGDGSIGLEVSSGLRGEDGCQGVCDGHHSHRRYIGGLDDGDVVGGDGSDDLRCNGDRQQQLIINGLREHVSRLKCDKLDLLRKNVTFQNDLKQLRGKELELSSDLASATKEIYRLQCILKEYREAGVGILPVSSEAGFNGEGSPV
>TR209260| putative phosphoinositide-specific phospholipase c |GO:0008081 GO:0006629 GO:0035556
MLRLSADGAPTSPPPSLDEGFLDLPAVKEVVLGGGRERGAEAAAAARRFGLERRPGEETALAVVYGANLSDNRALFFLCPPTLCGMWYSGLSRVVRGLKRQLQLSDRRMLWLKEQYLQLYFEENCCGPNTAEAIRIFGGRDWTLASNVGGSSPPDNGTLRRGASVKFKKKKSIGNIQALKELSIKQHEALSTLAMVGGAGGDPSPRRPTITGITTGTKIPYPPRSRSASSDIIIGVSPRGSADDLDRLSSSPVHHLLQQHNLLLATSPSSTTPIMASILHRERSRTGMTSIPSSGILGEPQQARHLRAGSITQETQLDFADFVSLFRSFSLRARKDLRDLFDQLAITCRSMSDSSLNDGPSSQKSSPEHGITGRNSITQHMTVPPQRIGLLTRNSSLDLATEDNFKGGPGLAALKKKKIFDAIAAASIVSNCAGIDTSRSQVITTATFWKFLETRQMEHHSEDEVKALIQRHEPDAWLRSQGCLSFEGFARFLMDKDNYAFPCERMAPDDDEMDQPMSHYYIASSHNTYLTGHQLKGESSVELYSQVLLTGCRCVELDCWDGDDGTPLIYHGHTFTTKIPFRSVVEAINRSAFVTSPYPVILSIENHCSIQQQARMAHIFQSVFGEKLVSNFLFEADLSDEPRLPSPYQLKGRILIKNKRLMADVPPQHLPLPPLPSMSATLSSAPLRATATIPPAGRGHGHPAASATSGAIQGGTGAGRASSIISNASGGSVNDDFSDDDDDDDDD
>TR170474| putative phosphoinositide-specific phospholipase c [small wing] |GO:0005509 GO:0035556
MAMLGLSNGIPSLGSFIPEMEQIICQLERGTVVTKFFARKRPERKTLMVRRETRQIVWSRSSSTRAFEGAVDLREVREIRVGKNSKDFERWTDEAKRIENLRCFVVYYGMEFRLKSISIAALSEKECELWVRGLKSLVPETQHAPYPLQVERWLRKEFYEMENMREMVTLKDLKAFLPRVNCKVSTSKLRELFQEVDTRKRMELGFDDFAVLYHHLMFDGNTFHEIFEPYRNYSENGKTVTLQEFQTFLIQEQHDSLGNDERQVSQFMRDYLQDPQRNVQEPYFSTSEFMDFLFSKQNEIWNHHFDHVYQDMTHPLAHYWISSSHNTYLTGDQFSSESSAEAYVRCLRMGCRCIELDCWDGPDGMPFIYHGHTLTTKIKFLDVIKTIKEHAFITSEYPVILSIEDNCSLPQQRKMASAMQEVFGDMLLSHTVEKNETQLPSPHQLRRKIILKHKKLPEGVDEASFMIKNDDAKEMDLRSTVKNGILYLQDPVDKDWNPHFFALTQNKLFYTDTFPENHDNDDGEEEEEEEGAAFHRPKEGVPNDELHFGEKWFHGKLPGGRAEAEELLQAYSYLGDGTFLVRESETFIGDYSLSFWRQGKVNHCRIRSKQDRGQTKFFMIDTNCFDSLYSLITHYRNHPLRSQEFLITLQESVPQPKKHEGQEWYHPHATRVIAEEMLRRVPSDGAFLVRPSEKDPNNSYAISFRAEKKIKHCKIKLEGRLFTMGTMQFESLVELVNYYEHHPLYKKIKLWYPVSEDVVRRLGADADDGSVHGTPGYMDPSTFTSKVTVKAVYDYQARHDDELSFCKHAIITNVSKQDGGWWRGDYGGHKQHWFPSNYVEEIEPQENRADENSADSLLLGNLQKGSLDMTGAVVDRVPGPGREWWVLRIQNPNMCTPFEVVAHSEEDALSWMAAIKETAQNASVRENQHKEMEKAWRIAKEMSNLIVYCRSVAFNMERIKRQGFIFYEMSSFPETKAEKLICAQENKFFLKYHQYQFSRVYPKGQRIDSSNYNPVPVWNSGCQMVALNYQTPDKPMHLNQAKFRENGSCGYILRPEFMFRSDFDPYFKNTLVGVEPLALSIRVIGARHLSKTGRGSASPFVEVEVVGADFDSGVKLTSKAISDNGFNPIWNEICDFDVFNPHFALLRFVVQDEDMFGDSNFIGQATYPVVCLRTGCRSIPLRNGFGEELELATLLVHLAIRNPMENGGQRRPSNSTAVPPSEPSRTSSGDLEEVLLPSTGHI
>TR148952| UV radiation resistance-associated gene protein |GO:0010508
MAMLGLSNGIPSLGSFIPEMEQIICQLERGTVVTKFFARKRPERKTLMVRRETRQIVWSRSSSTRAFEGAVDLREVREIRVGKNSKDFERWTDEAKRIENLRCFVVYYGMEFRLKSISIAALSEKECELWVRGLKSLVPETQHAPYPLQVERWLRKEFYEMENMREMVTLKDLKAFLPRVNCKVSTSKLRELFQEVDTRKRMELGFDDFAVLYHHLMFDGNTFHEIFEPYRNYSENGKTVTLQEFQTFLIQEQHDSLGNDERQVSQFMRDYLQDPQRNVQEPYFSTSEFMDFLFSKQNEIWNHHFDHVYQDMTHPLAHYWISSSHNTYLTGDQFSSESSAEAYVRCLRMGCRCIELDCWDGPDGMPFIYHGHTLTTKIKFLDVIKTIKEHAFITSEYPVILSIEDNCSLPQQRKMASAMQEVFGDMLLSHTVEKNETQLPSPHQLRRKIILKHKKLPEGVDEASFMIKNDDAKEMDLRSTVKNGILYLQDPVDKDWNPHFFALTQNKLFYTDTFPENHDNDDGEEEEEEEGAAFHRPKEGVPNDELHFGEKWFHGKLPGGRAEAEELLQAYSYLGDGTFLVRESETFIGDYSLSFWRQGKVNHCRIRSKQDRGQTKFFMIDTNCFDSLYSLITHYRNHPLRSQEFLITLQESVPQPKKHEGQEWYHPHATRVIAEEMLRRVPSDGAFLVRPSEKDPNNSYAISFRAEKKIKHCKIKLEGRLFTMGTMQFESLVELVNYYEHHPLYKKIKLWYPVSEDVVRRLGADADDGSVHGTPGYMDPSTFTSKVTVKAVYDYQARHDDELSFCKHAIITNVSKQDGGWWRGDYGGHKQHWFPSNYVEEIEPQENRADENSADSLLLGNLQKGSLDMTGAVVDRVPGPGREWWVLRIQNPNMCTPFEVVAHSEEDALSWMAAIKETAQNASVRENQHKEMEKAWRIAKEMSNLIVYCRSVAFNMERIKRQGFIFYEMSSFPETKAEKLICAQENKFFLKYHQYQFSRVYPKGQRIDSSNYNPVPVWNSGCQMVALNYQTPDKPMHLNQAKFRENGSCGYILRPEFMFRSDFDPYFKNTLVGVEPLALSIRVIGARHLSKTGRGSASPFVEVEVVGADFDSGVKLTSKAISDNGFNPIWNEICDFDVFNPHFALLRFVVQDEDMFGDSNFIGQATYPVVCLRTGCRSIPLRNGFGEELELATLLVHLAIRNPMENGGQRRPSNSTAVPPSEPSRTSSGDLEEVLLPSTGHI
>TR175986| leucine-rich transmembrane protein, putative [capricious] |GO:0005515
LGAGGVPPDGAGAVVTTPRHALPSKLSLKITYSNLEDMGNRSFKEFQFGLQELWLNYNNLTYISEDTFAGMSSLRFLSLADNQLTEFPVKALKHTPHLMTLDLGRSHLTSISQTDFEGLRELQSLFLVGNSISIIEQGSLPRGLQNLHIGKNRISDLNGSIRTLTNLRWLFMNENNLTTLDNQMPPEGVNLFLLHMSGNQLTKLPLELNSYPGLQSLFLQNNKLKSLDGAIRHLKKLQRLHLTDNLLETISSENFAELESLQHLEAGFNRLTSLNGSLHPLHSLSTLNLTHNLLTEFSLQEIKGLKKLHTVDLSHNQIKKLDGKLELQNHVELHTKVLELRLEYNQLEELGGVLGGLSTLQKLNLSHNLLQKIAPDDLINLDDLKILDISHNKLTTLEETSKTELPKLEELIAHNNLLTTVGPDFHGLPRICKANLQHNLITTIGIELTAKTRCKQHDVAGILRVHFEGNPLVCTDELMSAVTAIEENYTKLYGVPSCFNSTISPE
>TR215169| G-protein coupled receptor [rickets] |GO:0016021 GO:0004930 GO:0005515 GO:0007186
AMMAVGRERCIRPHFICDHVNDCQNGHSLSDEFGCPYSNHTHLLAIGVDPMAVDFFTCRDNRSLPTGLRCDLKWDCVEGEDEDKCPEPMPCRPPRTRDKEFFRCANGQCILAKHRCDLQFQCWDKSDEIGCGDFPCPRNFRKCLNGQCVREDFWCDYHVDCADVSDETDCGWPKECRSDEFRCRSGQCVPMSSRCYMSGQQRFGCADRSHLVGCEDWKCDVAAFKCRNGPCLNSSLVCDMRVDCPWSWTDEDGCPFSCSVTEPRCECRDVAINCTGLNLESLPTDIEVQMTKFYMADNFLNYSLNEETFSKLHRLSYLDLSNNSLTHIPPLAFKSLW-KLLLLNLKDNKITTLLNSTFYRLPNLRTLHLQGNN-INTIESMAFYGLSSLTTLDLSRQRITNISQGAFLGLRSLVSLDLSHNSLQYLMDGSLNGLPNLLFLDLSRNSIKMVGRNVFRSVSSLKKLKTDEFRFCCLAKHIPECLPPPDEFSSCEDLMSNLVLRICVWVLGAVATVGNALVITWRMIYKNTNQVHSFLITNLAIGDFFMGAYLLVIASVDAHYRGVYIIHDAAWRSSELCQLAGFISTFSSELSVYTLTVITLDRFLVIIFPFRVRRLEMPKTRLIMAGGWIGAAFLSGLPLMQIQYFQNFYGRSGVCLALHITPEKPNGWEYSVFVFLFLNLASFSIIALGYVWMYVVARTTRQAVVAVQRNHHSDQNHRQPQAPQQTPEQRRAESSMARRMTLLVATDAACWMPIILLGVASLGGVTVPPQVFAWVAVFVLPLNAAINPVLYTLSTAPFLGPARRGIRSFKRSFKRSISTDQRRTYTSTLGSQYEDRRLCANNCSRCDYHSQVANNFYSENVKLKVNPLEDDITTGDEPEESDPHNDQLFAVTKRVDINEGCRNPCIIETAVSMRGEIIPLKRLSPEKGNLRNKTRRK
>TR218188| putative G-protein coupled receptor 124 [rickets] |GO:0005515
MKIQLGFVIVTIINIISVLTSSELSDNVGKCPILCVCSPKNGNFKVKCQDTSLKLTSLLDFGVDKLPPNTVYLDLSDNGITTLPRAGFGHLVSLEKLDLKNNRIKIIEPHAFYNLLSLKRLDLSGNKISKINGSMIKDLLALERLKVSENNISRISHGAFSGLAKLKYLNLTSNPFTCDCHLQWLSEWMNNASNIKIISPLCKSPEALKDKPIKKLGSQEMTCIQAESVGRVNESEKGARIELRPSADQVVFEGD
>TR152573| tolloid protein |GO:0004222 GO:0005509 GO:0005515 GO:0006508
SIGKNCDKFGIVVHELGHVVGFWHEHTRPDRDNHVQIVRENIMVGQEYNFNKLTEEEVNSLGLPYDYDSIMHYAKTTFSKSTYLDTILPIEERGNRRKIEIGQRLKLSEGDVAQTNLLYKCFRCGRTYQDNAATFSSPRYPNSSPPSDGERCEWRITATHGERIVLNITELDLFKSDNCRSDYLEIRDGYWHKSSVIGRFCGSGRIHEPIVSTGSRMLVTYITSNRQNGHRGFTASYEAVCGGELDMENGHLESPNYPEDYQPGKECVWKITVPSEYQVALKFQSFEIENHDNCVYDYLEVRDGHDSNSPLIGVFCGYKVPPDIRSTSNKLLVKFVSDGSVQKAGFSAAFMKEFDECALINHGCQHHCINTLGGYECACKIGFELHSDGKHCEDACGGIFDASNGTITSPSFPEMYPGNKNCIWEIIAPPQYRITLNFTHFDLEGNNFVMSWQQECEYDSVEVSSRLGEDTFRKHGVFCGSRLPPLITSEGNALRLTFTSDNSVQKSGFAAVFFTDMDECAINNGGCQHECQNTIGSYACSCHNGFLLHENRHDCKEGGCKYEVSVPVGTITSPNYPDYYPSRKDCVWHFTTTPGHRIKLVFHEFEMEPHQECAYDHVALYDGGSAESHTLGRFCGSKVPHPIVAASNQMYMVFKSDASVQRKGFYARHTTVCGGHLQATTQVKHLYSHSRFGDHNYDNRADCDWVIEASPGFSVHLTFLTFEVEDEGDCTYDYVEVYSGLDTGGPSYGRFCGNANPTDIVSITEALLVRFRSDDSIVSKGFSAAYVAMEPREEREEQASLTLYNGENSF
>TR165718| tolloid protein |GO:0005515
MYLKWHYLIPCVLSPFSYSAPPACDAAAAEVVESVEAAAGGVPRPPHQRTTPTKAPKCDQTFVSQNSGSQNGTFSAPVFLNPEGHSRQCIYLFVAGPKQRVELVFTSFALRGTPPECIHEYLDVYAEVEDTEATELINSPFGGRYCGPIPPRRRISLHRTLALGFYTDKNFTTADLFRGRYLFINDSQFEVGTPAPSTVCSFTVDVKNKRQGVILSPTYPGVYPKDLSCSYRFNGDPGQRVRLEFRDFDLFFGGPHCPFDYVKVQDGPDNTSAVIGTYCGQQRNLVLYSSESSLLVTFVTLQRTANTQNRGFKGIFEFSESFVKLDFIGKNDGEHIRGSECDQKILSKKESRGTVYSPNYPFPYIPKIVCRYFIYGMQDMQHLERVRLEFEKFAIPKGDSGECTDGYLKLYLKGQEATDSYDKFDHELCGETLPAEVVSDGPRLVMVFSSGELQGGGFKARYTFETEYRIPGTAAPDGSCAFTYRSTSRKRGEFNSPRYPSNYPSTTNCTYLFLATPNEQVNIVFDHFKVRADGANATFGSYGSYCQEDWLEVYNVYKDGTERQVGRYCGVTAPGPVESNRGAIGLKVLLHSDGEGVFSGFKARYTFEVAKSIFGDCGSNLSSQESGVISSPNWPGNYDGPQRGLASKTCNWFVGVRPRHKILLNFEYFAVEGEPLARGCPAAVVRIWYTSDGPPLELCGEKLPLDRSQFTSDGNTMRISFISADKSVGAQGFRAVWTEIKDAVEAPVGAVEKPCDGGFVCLRSGFCISERLTCNKVPNCGYDDRSDEANCKYLH
>TR175967| serum response factor homolog|GO:0003677 GO:0046983
MSYNMSLLSGSETSPDMYGHGNSGNSRPSTSLGVTGVPRSGIAASVSCSGQGGVQRSLKRTSSDAEFDQNVVSAQQQSGMGLVGDCVGAADIADDAFAQSHQKKTPPPNGKKTKGRVKIKMEYIDNKLRRYTTFSKRKTGIMKKAYELSTLTGTQVMLLVASETGHVYTFATRKLQPMITSEAGKALIQTCLNSPDPPPSAAHHPDQRMSATGFEETELTYNIAEEEQKEQVQLAQGMRVSRGSFQDSSPSPGGSEDAGDSSGNEEALSPPAPASSPASMVVVKEEVARGEEEESSRSAPPVTSTPEFVTVMAARPQFITASAAARVMAGSGFSSPTPGVLYQTAQGMVYAAPSTASTTATTQLIPSTSSALANGATGLILSLAPSPHHASPSTAIAAAAALSGS
>TR175378| Serum response factor-binding 1
MIDKRGLNNEVVAMRKVVKQAKVRIIHKLSREIKGLRSKEGPEDLKEKCSRKADRKRDEIFAIKKLKPDDISKFALKNLEDPIKKIGDAGVSQELRAYFRFAASNVLSARVIAFREQYPDWKDCIHELLDTLGARRKNLNPPPKLTKGPGQNPTAFKKNDSHPTQNPTSINKSLRSEKKENSSGTALNSEAPRVNDSKKLNRKIAPSRESATTVKKSKFLSQWSVKEIDPVADHDSRAVTHQNEDVRSERLAKEDAIVHSKQKTVNQFSGVRKSSGIAEVKRFHELCEAQESMSGKTKEDPVKNDEGDDSDDDTDDESADGQAVDPFFVKPDGKTGYVTKIVVEEEGEDVEDEMGGSPPFSRGGKQFRGGR
>TR187819| homeobox protein extradenticle
ASGGSNGGTGSLGGPGQPDNAIEHSDYRAKLAQIRQIYHQELEKYEQACNEFTTHVMNLLREQSRTRPITPKEIERMVQIIHKKFSSIQMQLKQSTCEAVMILRSRFLDARRKRRNFSKQASEILNEYFYSHLSNPYPSEEAKEELARKCGITVSQVSNWFGNKRIRYKKNIGKAQEEANLYAAKKAAEVRPWTQFRDKAKESPARGGSSDSGRHGSPRPHLPLQSASPYSMGPGSGGASTPAP
>TR160328| TGF- partial [protein spitz-like] |GO:0005515
PNRMPPPLATLFLVASTVLGIAEACSSRSTPKPRAPSPTARPNITFHTYACPPAYAAWYCLNGATCFTVKIGESLLYNCECADGYMGQRCEFKDLENSYLPSRRRVMLETASIASGATIAVLLVVIVCFAFYIHFKRKHKPHSETNMSCEPGACQVDGVERRRPFSTRPPHSISLVPIPHHSSHHPHSPDCYPAPTHSSIPPHPLRAYPVDQGPGVYVSEIGDHRHEPYPGAHLPFPSSMGPHWGHRWDSPPSTSNPLSVPHYSRPFRGSDPRHGHRDRPPDRSDRPPPPPHAPADYPPRNQ
>TR42776| Transcriptional repressor scratch 1 [protein escargot-like]|GO:0003676 GO:0046872
SLDGPSESPPERQRPHPDITAAHAILDLSASTTSAGSDHVITAPPPSVPPAEEISQKHCPVSHSPVRLPSPPPPQPVHSQPLSIHMDREIIPDCNEQPPRVPSQNSNPSVISSLSPNMTNSTAPSTPQVFRINQGKTIAYTYEAFFVSDGRSKRKSAGISALPALPTLTTSVQPERPRYTCPECGKQYATSSNLSRHKQTHRSLDSQSAKKCSTCGKAYVSMPALAMHV
>TR159427| EH-domain-containing 2 partial [putative achaete scute target 1] |GO:0005525
MFSWITKDEHKKSSKVYGNVVEGLKQIYRTKLLPLEQHYLFHDFHSPQLDDPDFDAKPMILLVGQYSTGKTTFIRYLLEKDFPGIRIGPEPTTDRFIVVMSRDETQRDIIPGNALVVDPKFPFKPLSRFGNAFLNRFQCSCMDSPVLRNISIVDTPGILSGEKQRVDRGYDFTGVLEWFAERVDRIILLFDAHKLDISDEFRRSLEALRGHDDKIRIVLNKADMVDHQQLMRVYGALMWSLGKVLNTPEVARVYIGSFWDQPLRYDVNRRLFEDEKVDLFRDLLSLPKNAALRKLNDLIKRARLAKVHAYIISALRKDYPAVFGKENKKKELIKNLGIIYEQIQREHQISPGDFPELKRMQEQLVHEDFAKFHPLKPKMLETVDKMLADDIAKLMAIIPIEDEVHPMEDKIKGGAFDTVADTISPFGHGRGEGADAGSGEPEWIVTRDQDKYDGVFYSLGPIDGKVTGAAAKSEMLKSKLPNSSLSKIWKLSDIDKDGMLDSEEFALAMHLIQIKLDGHDIPVELPSHLVPPSKRNM
>TR226138| AChain Solution Structure Of The Brinker Dna Binding Domain In Complex With The Omb Enhancer|GO:0043565
MCDQKIQKIQTDSQQLWVNGEVDDQYFNRWLCYSPNPLPAGNGVLGARRMFSTNFKLRVLDSYRQDPECRGNQRATARKYGIHRRQIQKWLQVESLLRSAVRAPGDMALDLVIRDKDMPEASIKCEPMDEEEEDDEEEGDPPSPKSPTPVNHDPSIWVKQEAQEDVTNAQPTRLPTFSKRRSFSLQFKLGVLDAFHGGCGNQRATARLFGINRRQVQKWLRQEARLRSEASVAAVAAERQRLGRWAAEEEDAGEKTSAVEWEPPLNIPVVRRPWADCDEEVPEVKRPRWEWPMEQETALCLVKAEKPTGDLGDVPVAPKERRLPPAPHWVPPPLSVMYAACDEFIGLCQNTVAIGFHPNGKDVVSSSSSAASSPDPLPFTCLPPSPPGGRRRQCYHLDFKLRAIEEYHEGDGEWRGNQRAVAKRFGVHRRQIQKWLKQEEQLRQRAAGATTGSGC
>TR169526| naked cuticle homolog 2-like
ECDVSVDERPASDGYGAERKGREAPRRRQEFSFTLYDFDGHGKITKDVSNLCVHASRTATFFCPPPKDPGGHHSRVMRTKYLHPDKINEASAISELEGSVLTLSTRSEYFM
>TR219982| polyubiquitin binding domain of nemo
MQKLHTIIVSLMAVDPIRCKELKEEVLNLRKQISDDADKLQEQRGHLHDAENLLTDLKLGFDTIKAKEASVSSAIKENADADYHKAQARGYQQKLDDVTARLTQSEEALGNARSEVVSLAERLRRSETQLEEIPILKTQVEVYQSDFNTEREERARMAADKQQLVEEVYRLRARNQQLIDDMENLERRGAQENRSPPDGIASTTTAGGVYPRMHVFNTLAAPGRGSHQAYTNAEPEQRQATPDRSTRVSSEPELYTCPKCFKAYMELGPLEVHVNQCLDTP
>TR148092| cut |GO:0003677 
FRFLDSGPGGPMGGLGGLVGGVLGLGESLIPKGDPMEARLQEMLRHNMDRHASQTLDTLGISRRVRELLSAHNIGQRLFAKYVLGLSQGTVSELLSKPKPWDKLTEKGRDSYRKMHGWACDEAAILLLKSLIPKKGQLSNNREDDLAAMNEFGGHMHPSQRRVLNPKTHHSMPHHIAPIRFPMPAVRIKGKDTAGIPGFGSARGGVGGLGEDSMTEERIVHILNEASHAMKTASASLHGVVLGGVGGGNGGGGQEDSRSNDDSKSPHHGQSSSPLLSGNGSGKDGSSSQNRRLKKYENDDIPQEKVVRIYQEELAKLMGRRLEDSMRSPRDHHFPSLLFPHFFSGAGGPGGNAGSGGSTGHPLMDRTQEE
>TR178422| isoforms A H I S - protein pangolin, isoforms A/H/I/S-like|GO:0016055 
GSGHHQHPHVGLPHHSHHHHHHPHPHLHPAIVATGPKQDSEQNHRPPGMDQKNATTSSTDGSKSQDSGQADKKKPHIKKPLNAFMLYMKEMRAKVVAECTLKESAAINQILGRRWHALGREEQAKYYELARRERQLHMQLYPDWSSRANSSRGKKRKRKQETNDGGSNLKKCRARYGLDQQSQWCKPCRRKKKCIRYMDGGEDDGGQSTDDGGGGGDPMGSVGSAGDEAKTPDSEDFPDTPPQHQSHHNPFPHHPQLGVVVGNHHHNPHPLHLSHPFPHPLQHPPPPNALRGYSGASSDVGGLSSPGGLSLASPAGLSLTSPGLTSPPPSSVPLLPSPGPSSLASPALSLASPAVSL
>TR151876| Rap1 GTPase-GDP dissociation stimulator 1-B|GO:0005515
MADELGKGLESLCLAVEKKSDNIHVLLESLISTILRSGDALGGPTLNTLLDQLGIILASSRKGLQSIEAAKAIAEVAKCDAGREACLKHPTLINALLALLCLPETPVLEQESASIRATLTQACRALGNICYENQDGRKLILESDGLATLVNVLKWSITPPKGRSGSGEASLSSEAPWIGASRQLRNVSAGFLMNLLINQEEKQRKTLEMGIMDILCAFLELDAGDEEVTNHVLLIVGLLTDCDSEKELMSARLCRAVVYVLGASESPEVCEMCLDLLHGQAENETVKVHLAHAGLCETLIGLLRKHQPLLSEDDESRNVMKVACDLIVLILTGDESMNHLYSEGNGEVFQEMVRWLESDDEDLQVTGVLAMGNFARTDKHCIQMVQKGVCKKLLNLVQKNNTSKGDIRLQHALLSALRNLAIPPQNKGGLLEDGLVECVLPMASIPTFPVVFKLLGTLRMVIDGQERAAATLGNDKALVARLVEWCATDDHPGVQGEANRLIAWLIKNSKQESVMNTILDAGGLPFLVNMVTAEHAVMQNEALLALTLLTATLVSEESVADGLQIADIGNRIESLLTTGRKKKSNDDGKEGNMPEDVKRDELKVLQTEVILNALTLIGELIKSEKLKEHLKGSGIKQVLHSLTEDRLKKQAQQLTKLLDSG
>TR217271| rap1 GTPase-activating 1 isoform X2|GO:0005096 GO:0051056
DRVTPPALGAASRPKIETDDTARVFRRFFLAKEHSNLWAEDPLLGPVVLSLKMEMIPLANCASSPSTSNPAQEHVRIVLRTKSGTRHELLPTSDCEGSSLSPAFLARVLNADLTTEKYIPAASPRSSELIAAYDERSLVTTFKFGVLYQRFGQTAEEQLFANRVSSPAFDEFLHLLGKQIRLKEHTGYRGGLDIQFGQTGEEAVYEVFKERELMFHVSTLLPYTENDPQQLQRKRHIGNDIVAIVFQESNTPFTPDMIASHFLHAFIVVQVIDPCTSNTRYKVSVTARDDVPRFGPALPTPAIFRKGPEFKEFLLTKLLNAENACYKAEKFATLELRTRASLLGSLVEELRLKSQEFLGGDCSVTLNSNSGAKCDNSVGSSGGGNGGAGSRFIDTVRKVLTQRSRNHSIESNIIASGGSGSSQRSGSMTGRSNQTTSTPPSTGSRNGTVVNRRKSGEEKDGRWGSNPSSPVSSPDIPAHHHHGSHFGGSHAFQTQQQRVALSESDDSSLNSIEMEGNVGVCRHRSGISVVEVIGVGGTSGGGDSDTGLESLSSADIPQKNLSSSCKYCSEEREGDGSIGLEVSSGLRGEDGCQGVCDGHHSHRRYIGGLDDGDVVGGDGSDDLRCNGDRQQQLIINGLREHVSRLKCDKLDLLRKNVTFQNDLKQLRGKELELSSDLASATKEIYRLQCILKEYREAGVGILPVSSEAGFNGEGSPV
>TR209260| putative phosphoinositide-specific phospholipase c |GO:0008081 GO:0006629 GO:0035556
MLRLSADGAPTSPPPSLDEGFLDLPAVKEVVLGGGRERGAEAAAAARRFGLERRPGEETALAVVYGANLSDNRALFFLCPPTLCGMWYSGLSRVVRGLKRQLQLSDRRMLWLKEQYLQLYFEENCCGPNTAEAIRIFGGRDWTLASNVGGSSPPDNGTLRRGASVKFKKKKSIGNIQALKELSIKQHEALSTLAMVGGAGGDPSPRRPTITGITTGTKIPYPPRSRSASSDIIIGVSPRGSADDLDRLSSSPVHHLLQQHNLLLATSPSSTTPIMASILHRERSRTGMTSIPSSGILGEPQQARHLRAGSITQETQLDFADFVSLFRSFSLRARKDLRDLFDQLAITCRSMSDSSLNDGPSSQKSSPEHGITGRNSITQHMTVPPQRIGLLTRNSSLDLATEDNFKGGPGLAALKKKKIFDAIAAASIVSNCAGIDTSRSQVITTATFWKFLETRQMEHHSEDEVKALIQRHEPDAWLRSQGCLSFEGFARFLMDKDNYAFPCERMAPDDDEMDQPMSHYYIASSHNTYLTGHQLKGESSVELYSQVLLTGCRCVELDCWDGDDGTPLIYHGHTFTTKIPFRSVVEAINRSAFVTSPYPVILSIENHCSIQQQARMAHIFQSVFGEKLVSNFLFEADLSDEPRLPSPYQLKGRILIKNKRLMADVPPQHLPLPPLPSMSATLSSAPLRATATIPPAGRGHGHPAASATSGAIQGGTGAGRASSIISNASGGSVNDDFSDDDDDDDDD
>TR170474| putative phosphoinositide-specific phospholipase c [small wing] |GO:0005509 GO:0035556
MAMLGLSNGIPSLGSFIPEMEQIICQLERGTVVTKFFARKRPERKTLMVRRETRQIVWSRSSSTRAFEGAVDLREVREIRVGKNSKDFERWTDEAKRIENLRCFVVYYGMEFRLKSISIAALSEKECELWVRGLKSLVPETQHAPYPLQVERWLRKEFYEMENMREMVTLKDLKAFLPRVNCKVSTSKLRELFQEVDTRKRMELGFDDFAVLYHHLMFDGNTFHEIFEPYRNYSENGKTVTLQEFQTFLIQEQHDSLGNDERQVSQFMRDYLQDPQRNVQEPYFSTSEFMDFLFSKQNEIWNHHFDHVYQDMTHPLAHYWISSSHNTYLTGDQFSSESSAEAYVRCLRMGCRCIELDCWDGPDGMPFIYHGHTLTTKIKFLDVIKTIKEHAFITSEYPVILSIEDNCSLPQQRKMASAMQEVFGDMLLSHTVEKNETQLPSPHQLRRKIILKHKKLPEGVDEASFMIKNDDAKEMDLRSTVKNGILYLQDPVDKDWNPHFFALTQNKLFYTDTFPENHDNDDGEEEEEEEGAAFHRPKEGVPNDELHFGEKWFHGKLPGGRAEAEELLQAYSYLGDGTFLVRESETFIGDYSLSFWRQGKVNHCRIRSKQDRGQTKFFMIDTNCFDSLYSLITHYRNHPLRSQEFLITLQESVPQPKKHEGQEWYHPHATRVIAEEMLRRVPSDGAFLVRPSEKDPNNSYAISFRAEKKIKHCKIKLEGRLFTMGTMQFESLVELVNYYEHHPLYKKIKLWYPVSEDVVRRLGADADDGSVHGTPGYMDPSTFTSKVTVKAVYDYQARHDDELSFCKHAIITNVSKQDGGWWRGDYGGHKQHWFPSNYVEEIEPQENRADENSADSLLLGNLQKGSLDMTGAVVDRVPGPGREWWVLRIQNPNMCTPFEVVAHSEEDALSWMAAIKETAQNASVRENQHKEMEKAWRIAKEMSNLIVYCRSVAFNMERIKRQGFIFYEMSSFPETKAEKLICAQENKFFLKYHQYQFSRVYPKGQRIDSSNYNPVPVWNSGCQMVALNYQTPDKPMHLNQAKFRENGSCGYILRPEFMFRSDFDPYFKNTLVGVEPLALSIRVIGARHLSKTGRGSASPFVEVEVVGADFDSGVKLTSKAISDNGFNPIWNEICDFDVFNPHFALLRFVVQDEDMFGDSNFIGQATYPVVCLRTGCRSIPLRNGFGEELELATLLVHLAIRNPMENGGQRRPSNSTAVPPSEPSRTSSGDLEEVLLPSTGHI
>TR148952| UV radiation resistance-associated gene protein |GO:0010508
MAMLGLSNGIPSLGSFIPEMEQIICQLERGTVVTKFFARKRPERKTLMVRRETRQIVWSRSSSTRAFEGAVDLREVREIRVGKNSKDFERWTDEAKRIENLRCFVVYYGMEFRLKSISIAALSEKECELWVRGLKSLVPETQHAPYPLQVERWLRKEFYEMENMREMVTLKDLKAFLPRVNCKVSTSKLRELFQEVDTRKRMELGFDDFAVLYHHLMFDGNTFHEIFEPYRNYSENGKTVTLQEFQTFLIQEQHDSLGNDERQVSQFMRDYLQDPQRNVQEPYFSTSEFMDFLFSKQNEIWNHHFDHVYQDMTHPLAHYWISSSHNTYLTGDQFSSESSAEAYVRCLRMGCRCIELDCWDGPDGMPFIYHGHTLTTKIKFLDVIKTIKEHAFITSEYPVILSIEDNCSLPQQRKMASAMQEVFGDMLLSHTVEKNETQLPSPHQLRRKIILKHKKLPEGVDEASFMIKNDDAKEMDLRSTVKNGILYLQDPVDKDWNPHFFALTQNKLFYTDTFPENHDNDDGEEEEEEEGAAFHRPKEGVPNDELHFGEKWFHGKLPGGRAEAEELLQAYSYLGDGTFLVRESETFIGDYSLSFWRQGKVNHCRIRSKQDRGQTKFFMIDTNCFDSLYSLITHYRNHPLRSQEFLITLQESVPQPKKHEGQEWYHPHATRVIAEEMLRRVPSDGAFLVRPSEKDPNNSYAISFRAEKKIKHCKIKLEGRLFTMGTMQFESLVELVNYYEHHPLYKKIKLWYPVSEDVVRRLGADADDGSVHGTPGYMDPSTFTSKVTVKAVYDYQARHDDELSFCKHAIITNVSKQDGGWWRGDYGGHKQHWFPSNYVEEIEPQENRADENSADSLLLGNLQKGSLDMTGAVVDRVPGPGREWWVLRIQNPNMCTPFEVVAHSEEDALSWMAAIKETAQNASVRENQHKEMEKAWRIAKEMSNLIVYCRSVAFNMERIKRQGFIFYEMSSFPETKAEKLICAQENKFFLKYHQYQFSRVYPKGQRIDSSNYNPVPVWNSGCQMVALNYQTPDKPMHLNQAKFRENGSCGYILRPEFMFRSDFDPYFKNTLVGVEPLALSIRVIGARHLSKTGRGSASPFVEVEVVGADFDSGVKLTSKAISDNGFNPIWNEICDFDVFNPHFALLRFVVQDEDMFGDSNFIGQATYPVVCLRTGCRSIPLRNGFGEELELATLLVHLAIRNPMENGGQRRPSNSTAVPPSEPSRTSSGDLEEVLLPSTGHI
>TR175986| leucine-rich transmembrane protein, putative [capricious] |GO:0005515
LGAGGVPPDGAGAVVTTPRHALPSKLSLKITYSNLEDMGNRSFKEFQFGLQELWLNYNNLTYISEDTFAGMSSLRFLSLADNQLTEFPVKALKHTPHLMTLDLGRSHLTSISQTDFEGLRELQSLFLVGNSISIIEQGSLPRGLQNLHIGKNRISDLNGSIRTLTNLRWLFMNENNLTTLDNQMPPEGVNLFLLHMSGNQLTKLPLELNSYPGLQSLFLQNNKLKSLDGAIRHLKKLQRLHLTDNLLETISSENFAELESLQHLEAGFNRLTSLNGSLHPLHSLSTLNLTHNLLTEFSLQEIKGLKKLHTVDLSHNQIKKLDGKLELQNHVELHTKVLELRLEYNQLEELGGVLGGLSTLQKLNLSHNLLQKIAPDDLINLDDLKILDISHNKLTTLEETSKTELPKLEELIAHNNLLTTVGPDFHGLPRICKANLQHNLITTIGIELTAKTRCKQHDVAGILRVHFEGNPLVCTDELMSAVTAIEENYTKLYGVPSCFNSTISPE
>TR215169| G-protein coupled receptor [rickets] |GO:0016021 GO:0004930 GO:0005515 GO:0007186
AMMAVGRERCIRPHFICDHVNDCQNGHSLSDEFGCPYSNHTHLLAIGVDPMAVDFFTCRDNRSLPTGLRCDLKWDCVEGEDEDKCPEPMPCRPPRTRDKEFFRCANGQCILAKHRCDLQFQCWDKSDEIGCGDFPCPRNFRKCLNGQCVREDFWCDYHVDCADVSDETDCGWPKECRSDEFRCRSGQCVPMSSRCYMSGQQRFGCADRSHLVGCEDWKCDVAAFKCRNGPCLNSSLVCDMRVDCPWSWTDEDGCPFSCSVTEPRCECRDVAINCTGLNLESLPTDIEVQMTKFYMADNFLNYSLNEETFSKLHRLSYLDLSNNSLTHIPPLAFKSLW-KLLLLNLKDNKITTLLNSTFYRLPNLRTLHLQGNN-INTIESMAFYGLSSLTTLDLSRQRITNISQGAFLGLRSLVSLDLSHNSLQYLMDGSLNGLPNLLFLDLSRNSIKMVGRNVFRSVSSLKKLKTDEFRFCCLAKHIPECLPPPDEFSSCEDLMSNLVLRICVWVLGAVATVGNALVITWRMIYKNTNQVHSFLITNLAIGDFFMGAYLLVIASVDAHYRGVYIIHDAAWRSSELCQLAGFISTFSSELSVYTLTVITLDRFLVIIFPFRVRRLEMPKTRLIMAGGWIGAAFLSGLPLMQIQYFQNFYGRSGVCLALHITPEKPNGWEYSVFVFLFLNLASFSIIALGYVWMYVVARTTRQAVVAVQRNHHSDQNHRQPQAPQQTPEQRRAESSMARRMTLLVATDAACWMPIILLGVASLGGVTVPPQVFAWVAVFVLPLNAAINPVLYTLSTAPFLGPARRGIRSFKRSFKRSISTDQRRTYTSTLGSQYEDRRLCANNCSRCDYHSQVANNFYSENVKLKVNPLEDDITTGDEPEESDPHNDQLFAVTKRVDINEGCRNPCIIETAVSMRGEIIPLKRLSPEKGNLRNKTRRK
>TR218188|putative G-protein coupled receptor 124 [rickets] |GO:0005515
MKIQLGFVIVTIINIISVLTSSELSDNVGKCPILCVCSPKNGNFKVKCQDTSLKLTSLLDFGVDKLPPNTVYLDLSDNGITTLPRAGFGHLVSLEKLDLKNNRIKIIEPHAFYNLLSLKRLDLSGNKISKINGSMIKDLLALERLKVSENNISRISHGAFSGLAKLKYLNLTSNPFTCDCHLQWLSEWMNNASNIKIISPLCKSPEALKDKPIKKLGSQEMTCIQAESVGRVNESEKGARIELRPSADQVVFEGD
>TR152573| tolloid protein |GO:0004222 GO:0005509 GO:0005515 GO:0006508
SIGKNCDKFGIVVHELGHVVGFWHEHTRPDRDNHVQIVRENIMVGQEYNFNKLTEEEVNSLGLPYDYDSIMHYAKTTFSKSTYLDTILPIEERGNRRKIEIGQRLKLSEGDVAQTNLLYKCFRCGRTYQDNAATFSSPRYPNSSPPSDGERCEWRITATHGERIVLNITELDLFKSDNCRSDYLEIRDGYWHKSSVIGRFCGSGRIHEPIVSTGSRMLVTYITSNRQNGHRGFTASYEAVCGGELDMENGHLESPNYPEDYQPGKECVWKITVPSEYQVALKFQSFEIENHDNCVYDYLEVRDGHDSNSPLIGVFCGYKVPPDIRSTSNKLLVKFVSDGSVQKAGFSAAFMKEFDECALINHGCQHHCINTLGGYECACKIGFELHSDGKHCEDACGGIFDASNGTITSPSFPEMYPGNKNCIWEIIAPPQYRITLNFTHFDLEGNNFVMSWQQECEYDSVEVSSRLGEDTFRKHGVFCGSRLPPLITSEGNALRLTFTSDNSVQKSGFAAVFFTDMDECAINNGGCQHECQNTIGSYACSCHNGFLLHENRHDCKEGGCKYEVSVPVGTITSPNYPDYYPSRKDCVWHFTTTPGHRIKLVFHEFEMEPHQECAYDHVALYDGGSAESHTLGRFCGSKVPHPIVAASNQMYMVFKSDASVQRKGFYARHTTVCGGHLQATTQVKHLYSHSRFGDHNYDNRADCDWVIEASPGFSVHLTFLTFEVEDEGDCTYDYVEVYSGLDTGGPSYGRFCGNANPTDIVSITEALLVRFRSDDSIVSKGFSAAYVAMEPREEREEQASLTLYNGENSF
>TR165718| tolloid protein |GO:0005515
MYLKWHYLIPCVLSPFSYSAPPACDAAAAEVVESVEAAAGGVPRPPHQRTTPTKAPKCDQTFVSQNSGSQNGTFSAPVFLNPEGHSRQCIYLFVAGPKQRVELVFTSFALRGTPPECIHEYLDVYAEVEDTEATELINSPFGGRYCGPIPPRRRISLHRTLALGFYTDKNFTTADLFRGRYLFINDSQFEVGTPAPSTVCSFTVDVKNKRQGVILSPTYPGVYPKDLSCSYRFNGDPGQRVRLEFRDFDLFFGGPHCPFDYVKVQDGPDNTSAVIGTYCGQQRNLVLYSSESSLLVTFVTLQRTANTQNRGFKGIFEFSESFVKLDFIGKNDGEHIRGSECDQKILSKKESRGTVYSPNYPFPYIPKIVCRYFIYGMQDMQHLERVRLEFEKFAIPKGDSGECTDGYLKLYLKGQEATDSYDKFDHELCGETLPAEVVSDGPRLVMVFSSGELQGGGFKARYTFETEYRIPGTAAPDGSCAFTYRSTSRKRGEFNSPRYPSNYPSTTNCTYLFLATPNEQVNIVFDHFKVRADGANATFGSYGSYCQEDWLEVYNVYKDGTERQVGRYCGVTAPGPVESNRGAIGLKVLLHSDGEGVFSGFKARYTFEVAKSIFGDCGSNLSSQESGVISSPNWPGNYDGPQRGLASKTCNWFVGVRPRHKILLNFEYFAVEGEPLARGCPAAVVRIWYTSDGPPLELCGEKLPLDRSQFTSDGNTMRISFISADKSVGAQGFRAVWTEIKDAVEAPVGAVEKPCDGGFVCLRSGFCISERLTCNKVPNCGYDDRSDEANCKYLH
>TR175967| serum response factor homolog|GO:0003677 GO:0046983
MSYNMSLLSGSETSPDMYGHGNSGNSRPSTSLGVTGVPRSGIAASVSCSGQGGVQRSLKRTSSDAEFDQNVVSAQQQSGMGLVGDCVGAADIADDAFAQSHQKKTPPPNGKKTKGRVKIKMEYIDNKLRRYTTFSKRKTGIMKKAYELSTLTGTQVMLLVASETGHVYTFATRKLQPMITSEAGKALIQTCLNSPDPPPSAAHHPDQRMSATGFEETELTYNIAEEEQKEQVQLAQGMRVSRGSFQDSSPSPGGSEDAGDSSGNEEALSPPAPASSPASMVVVKEEVARGEEEESSRSAPPVTSTPEFVTVMAARPQFITASAAARVMAGSGFSSPTPGVLYQTAQGMVYAAPSTASTTATTQLIPSTSSALANGATGLILSLAPSPHHASPSTAIAAAAALSGS
>TR175378| Serum response factor-binding 1
MIDKRGLNNEVVAMRKVVKQAKVRIIHKLSREIKGLRSKEGPEDLKEKCSRKADRKRDEIFAIKKLKPDDISKFALKNLEDPIKKIGDAGVSQELRAYFRFAASNVLSARVIAFREQYPDWKDCIHELLDTLGARRKNLNPPPKLTKGPGQNPTAFKKNDSHPTQNPTSINKSLRSEKKENSSGTALNSEAPRVNDSKKLNRKIAPSRESATTVKKSKFLSQWSVKEIDPVADHDSRAVTHQNEDVRSERLAKEDAIVHSKQKTVNQFSGVRKSSGIAEVKRFHELCEAQESMSGKTKEDPVKNDEGDDSDDDTDDESADGQAVDPFFVKPDGKTGYVTKIVVEEEGEDVEDEMGGSPPFSRGGKQFRGGR
>TR76303| homeobox protein extradenticle
KHTLNCHRMKPALFSVLCEIKEKTVLSLRNTQEEEPPDPQLMRLDNMLIAEGVAGPEKGGGAGAAASASAAASGGSNGGTGSLGGPGQPDNAIEHSDYRAKLAQIRQIYHQELEKYEQACNEFTTHVMNLLREQSRTRPITPKEIERMVQIIHKKFSSIQMQLKQSTCEAVMILRSRFLDARRKRRNFSKQASEILNEYFYSHLS
>TR289433| homeobox protein extradenticle-like 
KYNLYDPSVNESKPFHDVNGMLQQIMSIVDQSLDEAQARKHAFNQSRLKPAFFQVLCEIKEKTAINIRNLPEDEPPDSQLMRLDNMLIAEGIAGPERTGGSSSSAASANAAASINDDSALEHGDYRAKLTQIRQLYHSELEKYEQACNDFTSHVINLLREQSRARPISPREIDRMVLIIRKKFSSIQLQLKQSTCEAVMILRSRFLDARRKRRNFSKTATEVLNEYFYSHLSNPYPSEEAKEELARKCGISVSQVSNWFGNKRIRYKKNIGKAQEEANLYASKLANQASQGVGGMRRDSESPQQDPSGRKIRNRVKK*
>TR160328| TGF- partial [protein spitz-like] |GO:0005515
PNRMPPPLATLFLVASTVLGIAEACSSRSTPKPRAPSPTARPNITFHTYACPPAYAAWYCLNGATCFTVKIGESLLYNCECADGYMGQRCEFKDLENSYLPSRRRVMLETASIASGATIAVLLVVIVCFAFYIHFKRKHKPHSETNMSCEPGACQVDGVERRRPFSTRPPHSISLVPIPHHSSHHPHSPDCYPAPTHSSIPPHPLRAYPVDQGPGVYVSEIGDHRHEPYPGAHLPFPSSMGPHWGHRWDSPPSTSNPLSVPHYSRPFRGSDPRHGHRDRPPDRSDRPPPPPHAPADYPPRNQ
>TR42776| Transcriptional repressor scratch 1 [protein escargot-like]|GO:0003676 GO:0046872
SLDGPSESPPERQRPHPDITAAHAILDLSASTTSAGSDHVITAPPPSVPPAEEISQKHCPVSHSPVRLPSPPPPQPVHSQPLSIHMDREIIPDCNEQPPRVPSQNSNPSVISSLSPNMTNSTAPSTPQVFRINQGKTIAYTYEAFFVSDGRSKRKSAGISALPALPTLTTSVQPERPRYTCPECGKQYATSSNLSRHKQTHRSLDSQSAKKCSTCGKAYVSMPALAMHV
>TR159427| EH-domain-containing 2 partial [putative achaete scute target 1] |GO:0005525
MFSWITKDEHKKSSKVYGNVVEGLKQIYRTKLLPLEQHYLFHDFHSPQLDDPDFDAKPMILLVGQYSTGKTTFIRYLLEKDFPGIRIGPEPTTDRFIVVMSRDETQRDIIPGNALVVDPKFPFKPLSRFGNAFLNRFQCSCMDSPVLRNISIVDTPGILSGEKQRVDRGYDFTGVLEWFAERVDRIILLFDAHKLDISDEFRRSLEALRGHDDKIRIVLNKADMVDHQQLMRVYGALMWSLGKVLNTPEVARVYIGSFWDQPLRYDVNRRLFEDEKVDLFRDLLSLPKNAALRKLNDLIKRARLAKVHAYIISALRKDYPAVFGKENKKKELIKNLGIIYEQIQREHQISPGDFPELKRMQEQLVHEDFAKFHPLKPKMLETVDKMLADDIAKLMAIIPIEDEVHPMEDKIKGGAFDTVADTISPFGHGRGEGADAGSGEPEWIVTRDQDKYDGVFYSLGPIDGKVTGAAAKSEMLKSKLPNSSLSKIWKLSDIDKDGMLDSEEFALAMHLIQIKLDGHDIPVELPSHLVPPSKRNM


Wing Pigmentation Genes
>TR167515| homeobox aristaless [homeobox protein arx]|GO:0043565 GO:0006355
ftpthpytsytyhpaihedtfvrrkqrrnrttftlqqleeletafsqthypdvftredlamkinltearvqvwfqnrrakwrkaerlkeeqrkrdeqrerrsgeeecedevetgaea
>TR93729| cysteine sulfinic acid decarboxylase [black]|GO:0016831 GO:0030170 GO:0019752
enadsvtwnphkllsapqqcstfhvrkgkcadgspgvlsathstcasylfqkdkfydtsldtgdkhvqcgrrpdvlkfwfmwkakgtnglekhvdtvfenaayftekirhrdgfklvvpepqctnicfwyippslrgeeendefneklhkvapkikelmmrsgtmmityqplgnlpnffrlvlqnsglthndmdffiaeierlgkdl
>TR1248| putative ebony
ltyqafscvkdaeecdgtvpiglpldntlvylldkqfrpvptgevgelfasglnvasgymhstteadrfchnpfatdpeysllyrtgdfarvtkrgdlsyegrsdsqvkvrghrvdlteverafttgvpglakvvvlcykpghinqaivafvtledgvsmaaneiegliqkilppymmpevvfidkipllvngktdrqallkkyeedfqgyendeknyvqpdlsevpeskkkaamalfqtvdhvlkgsgaaaatlpigtqicrrhnlplslksnfyevggnsl
>TR192472| isoform A [ putative tan]
GCSNTCVNQPGQEIPGHTEDALPEVLNHIYFVSAHIISDEPEGRWKINEEKFTSLCYAGHLPGYTMNYNHHGLVFSVNTISAKKLVSGKTPRHFLTRALLAAENLSQAQQILRDEGVGAGDAVSVNMTFLNQDGNRLFHNAEVGPAILGESPPRSQLNILTASQGECFFHCNKYLRLNVPEVDTMIITSSDRRHAVVDARATPPETKKDVISILGDQSDGEYCIFREGKTDDFVKTVAVGIFDCVQKTWSVYTSNPKENDPIVVFPLLLKSKEE*
>TR182547| protein yellow
MANVVRWTRSLALALVLAMAGFWANPAAGENADEGGKGSLEEVYAWKVLDYAWPSEAYRDRAIARGDYIPKNNAIVGVKVWGDRAYVSVPRWLPGVPSTLNWVPSTVGEGSKGPLSTTLNPYPCWDMQEVGNCSAIQFVQSMEIDPLGRMWVLDVGRRNFFTKSPDNLCPPKLLLLDLNQDGSVLHTFVFPDEVASHTHSFLNDLVIDVSGGGNGTDWYAYISDAKGDPATGGGGIVVYHLGSDRAWRVADAASMNAGTGEATEATVGGKRSKLKANVDGIALASLSEGADKVFYAPLGSFNLYVLPTSLLRAPPTDPAEVTSSVVDLGRRTSQGDGMAVDSTGALYFGLLGQDAFARWTRSACPNFSDRLIGCASNGDPSEAEVVAQDSVRLQWVDSFGFDNINKNLFVVSNRLQNLQLNDVKLDEVNYRLLRLKINAKSYMYLD
>TR183295| yellow-like 
mgakalslalltlallhiatstkmkeilrwkqvdfsfpsneertraiqtgrfhqentlplglevygdrvfitlprwktgspatlayvqrptdlngpptspllnpypnwewnrensgcdaftsvframadscgrlwvmdagkynvvvdpqqvcppqvlvfdlktdtlvrrfrfpdadlkdgsfftnvavdvrndrngrpicdeayaymsdvwrsgmvvyswkhdkswrvnhdfflpdplnckykvggysfhwsdglftvamgpvdpatndrmlyfhamssdkefvvpastvrnsslanaypdtfkllgsrgqnghssasavdkdgilfynlvtrnavgcwnskfpfrtpylgevdiddetlvfpndlkvdqggmdgfprsqgskrrrqtrtqgkqnlwvlsnklqaflygeldkskynfrilalpvedaikdnachpdfipsvedlparfgcdl
>TR215139| ecdysone receptor|GO:0005634 GO:0004884 GO:0005496 GO:0008270 GO:0043565 GO:0006355 GO:0035076
AGTILPPPPILAAAASTTGPALPPATVADISEVDLELWDLDLNGQNVMMGGGVGVAASGMHPSHLTVTMTPTPVSLVPRRCSSSSASSVGSSGALGLAAARRQRRLRRTSSSDTSNESISGREDLSPPSSLNGYSVDSCSGDGGVGRGSSKSSSMGAGIGMSMTGAGAKKGPAPRQQEELCLVCGDRASGYHYNALTCEGCKGFFRRSITKNAVYQCKYGNNCEIDMYMRRKCQECRLKKCLSVGMRPECVVPEYQCQVKREAKKAQKDKDKPNSTTNGSPEMKDPETKXXXXXDEKPQTQAASPAAVNGVKPVSPEQEELIHRLVYFQNEYEQPSEEDLKRITNQPCDGEDASDLRFRHITEITILTVQLIVEFAKRLPGFDKLLREDQIALLKACSSEVMMLRMARRYDVQTDSIVFANNQPYSRDSYSLAGM--GETIEDLLRFCRQMYAMKVDNAEYALLTAIVIFSERPALIEGWKVEKIQEIYLEALRAYVDNRRRLRSGPIFARLLSVLTELRTLGNQNSEMCFSLKLKNKKLPPFLAEIWDVIP
>TR162214| homeobox araucan-like|GO:0043565 GO:0006355
ggpaaavygtpypstdqnpypsigvdtsafysplsnpyalkdgsatadvtawtsaglqpttgyypydptlaaygygagydlaarrknatrestatlkawlnehkknpyptkgekimlaiitkmtltqvstwfanarrrlkkenkmtwepknkaedeeddga
>TR165868| vacuolar sorting-associated 18 homolog [dor]
MASFYQSGQPNQRNKSGITRPEMNKTGVIYMKLEEDVPIFSKYKVNYPLNDKICHLVVSSDILVLALANNKLLRIDLRQPDTPEEIDINKHLNQTKISSLFLDPLGNHLLISLSPDLVGAQGELLYIPKKSTRAKQLSKFKGHIITAVAWNFGNDAENTTGPVLLGTSKGLIIESEFGMENDRIFQTSLEQYWKQVFDIGKGSEMPITGIEFHHVPRTDRYFIIVTTLTQLYQFIGETVGSDERPVLQPIFSKYFSKPEMFLAMVSSLSYSKLKFYYPSPRGLPKNVAWLTGSGLYIGKIDVSAEGGTDSVIFQQDMIQFPKTIDSSLETSTTPLSFILTEFHALLLYSDHVKGICTLNKELIFEDMHNEAYGQLINITKDPVRNTIWAYSEKAVFKYKVAKEDRNVWMVYVEKGMFDLAKQYCQDNPAHMDQVLIKQAEKYFEEEQYEESAIYYAKTHCSFEEITLKFLAVNEIEALKTFLIKKLETLREVDKTQITMIVVWVTELFLKQLGTLRNEEKTDLPEYMILQKEFDQFLTKKEVIGSVMDNQDTLYKLMASHGDKDNMIQFAMLNCDFEKVVRHHIRKNNYHEALEILKCENKKELFYQFAPTLMQAIPKLTFQVIINHWGGLDPSKLIPALVTCDQNDTQVLEVINYLEYCVYSLRTQEPAIHNYLLTLYAKRNSPKLMSYLTTQGQDARLVCYDIHYALKLCREHDLTEACVQLSTLLGMWEAAVDLALQVGPELAKRTASLPPPSPGSDPDLRKRLWLKIAEHVVKEKDDIKEAMEFIQQCDLIKIEDILPFFSDFVTIDHFKDAICTSLQEYNQHIQDLKEEMEEATKSAEIIRQDIQSFRNKXXXXXXXXXXXXXXXXXXXRXXXXXXCXXXXHXXCLLHQMHPLLPTGKRNRLHDLQKQLASFSLREDTASVGSSSLGAREQIKGDIDNIVASECLFCGEMMIRSIDQPFIEDEDFDRVFKEWL
>TR231264| henna isoform X1|GO:0004505 GO:0005506 GO:0016597 GO:0006559 GO:0055114 GO:0000162 GO:0006571 GO:0009094
MPIEHENDPTLMRGGNYIKEGIDSSKSTCLIFSPYDQDEVGALAKALKVFENNHINLLHIESRLSKRFPEGYEFMVECDPTSGDLNRGIEQLREICSYFNIITRNYKDNLGTVPWFPRRIRDLDKFANQILSYGAELDSDHPGFTDPTYRERRKYFADLAYHYKHGEPLPRVDYTKEEVETWGKVFRELTTLYPTHACREHNHVFPLLIENCGYREDNIPQLQDISDFLKDSTGFSLRPVAGLLSSRDFLAGLAFRVFHSTQYIRHPSCPLYTPEPDVCHELLGHVPLLADPSFAQFSQEIGLASLGAPDDYIEKIATCYWFTVEYGLCTQDGQLKAFGAGLLSSFGELQYCLSGKAELRPFDPPRTAVQKYPITEYQPTYFVAESFQDAKEKMIKYAQTIPRHFGVRYNAYTQSIEILDSKPQIKNLISNINREIQTLMDAFQKL
>TR165906| bric-a-brac 1-like |GO:0003677
ppalsalsalgpqpeemeikpgiaemireeeraklletshawlgastssitdnlggslesnyhlqrpllnsfitssldqslnkcdrrhitnsyqyqlqsmwqkcwntnqslvhnlrfrergplkswrpetmaeaifsvlkeglslsqsarkydipyptfvlyanrvhnmlgpsidggsgypffadlrpkgrgrpqrillgnwpddhirgviravvfrdtthvkdetahlsyppriqvkltstt
>TR206843| bric-a-brac 2|GO:0005515
mkcfpanvptikrplstrpgtnmasqhyclrwnnyqsnmtsvfhqllqdeafvdvtlacneaslkahkvvlsacspffqklllenpckhpviimpqdvcysdlkfiiefvykgeidvsqaelqsllktadqlkikglcevsdknaggsdgvtslpisrrsftklrlsgykrrcvdqvrraiftdhhrqhhhggmgmgmrrrsldterghgaaglpppggpp
>TR154607| bric-a-brac 2-like|GO:0005515
MQHPIGSPQQFCLRWNNYQSNLTSVFDQLLQSEAFVDVTLACDGHSVKAHKMVLSACSPYFQSLFFDNPCRHPIVIL-KDIKWPELKAVVEFMYRGEINVSQEQIGPLLKVAEALKIRGLADVNGDSDSPPAAATSASGGASAPSSNASSSSSEAGPSGGKKSGGGMG
>TR158701| phenoloxidase 2|GO:0016491 GO:0008152
MAQTANPQQQMLYLLERPKEPYFIPKGERGAVFDVPSNDYLTERFRPLAEELGNRFGEEAQVRIPVNPITVPDISLSMQLGRNEFFSLFLPYHREMAGRLIDIFMGMRSYQDFVSASVFCRERVNPYMFVYALSVAILHRNDTKNIRLPPLSEIFPDKYLDARVFPQAREEANVAQETSRLPIEIPKDYTASDLEIEHRVAYFREDIGINLHHWHWHLVYPFNGPRAIVDKDRRGELFYSMHQQIQARYNFERFCNELARVKRLHDFRAPIPEAYFSKLDNTMASRVYASRPANMILQDINRDVDQLTFDIQDLERWRDRIIEAIHLGRVINEKGEVVELTEMGGIDVLGNMIEASILSINRNLYGDMHNFGHVALGIVHDPDFRHLETYTPVADPSTAMRDPVFYRLHALVDELFHMHKRTLPRYTVAQLDYPGVKVNGLEVMTKGRNKNEMATYWQKRDVDLSRGVDFSPRGAVFARITHLQHEPFVYRIQVENGTNSTLSGTVRIYMAPKFDERKIPMLFRDQRILFIELDKFVVELKPKTNVIERASSQNSLTIPWEQTFRDLEVNPPGTGNENQAS-NYCGCGWPEHMLIPKGAPGGFPCELFVMISNIKDDLVQQSKRQDGCPNGASFCGLRDQKYPDKRSMGYPFDRMPRTGVDTLKQFLTPNMMVTDVFIHHFNRTEPPPKSDAK
>TR200723| phenoloxidase 2|GO:0016491 GO:0008152
SCSTPVQRAANWLERETRQKTVERVPIREFASQFTRSQHQASLCRISMAGQATNQQQQVLFLLSRPQEPFFVPKGDAGGVFEPPNNDFLAERFQSVAGELGTRFGEDTNVRVPVKNITFPDLSFPMMLGRRDNFSLFIPRHREMAARLIDIFMGMRTYEDFLAVSVYARDRINPNMYVYALSVAILHRPDTRNVELPPLYEMFPDKYVDGGLFARAREEASVVPEGQRIPLEIPKDYTASDLDIEHRVAYFREDLGINLHHWHWHLVYPFQAARNIVDKDRRGELFYYMHQQIIARYNFERLCNRLGRVKRLLNLREPLEEGYFPKLDSVVASRTWAPRHAGARLSDINREVDQLVFDLSDLERWRDRIIEAIHLGRVINEKGENVQLTEMGGIDFLGNMIEASPVLSINRNLYGDMHNLGHVAIALSHDPDNRHLETFSVMGDPATAMRDPVFYRWHAFVDDLFQMHKRTLPSYNANQLDYQGIRITNLELITKGRGKNELNTFWQQNDVDLSRGMDFAPRGSVFARVTRLAHTRFSYRITVENSSNQQRMGTVRIFLAPKFDERGLPMLFRDQRLLFIELDKFQVTLKNNPRSNTIQRDSNRSSITIPIERTFRDLE-SRP-TGQADLASFNFCGCGWPEHMLIPKGSAEGFPCQLFVMISNFNDDKVDGSGVNGTCAEANSFCGIRDKKYPDRRSMGFPFDRVPRTGVDTLQQFLTPNMAVTDVRIAFEDRTEAPKAIPNTVG
>TR201540| phenoloxidase 2-like|GO:0016491 GO:0008152
rpdtrglrlpalaeifpgrfvqhgvvsrarnlanthgttkrtpievprdftasglyeehrvayfredlginlhhwhwhlvypnsgdrsivnkdrrgelfyymhqqivarynferlcnrlprtkrllnlrepipegyfpkldatvasrvwqprhagailqdinrsqeqmkfdledldrwrgrileaihtgvaideagkrvpltevegidilgniiessslsinrnlygdmhnlghmaiayahdpdsrhletfgvmgdpatamrdpvfyrwhatvddlfqahkmtlpryttavldypgikvtkvdvvsegrgrtnemetfwqqrdidlsrgidfaprgpvlarvthlqhapfnyritventlskpvlgtvriflapkfdergvemmfrdqrllfvemdkfqvtlkaktkdnvierssasssitipfertfqemefptdgkanegfnycgcgwpqnmlvprgtpdgfpcqlfvvisnfnddrinqtpppaskypdavsfcglrdkkypdkrsmgypfdrmprdgadtirqfltpnmslidvkiffsdrtespkdqp
>TR204513| vitellogenin-like isoform X2|GO:0005319 GO:0006869
GNKRASYRSRSLRTFKKQNCCHFLSCELGVQAMGRISWIYCLAAFTTCLSSMVQGNIFGRGREATYSYAVDVRAGTVDPTDYASQFGLKGTLTIQSNNDGSAATFKLSGITVQVYNGPLSLDDQPETKFLQAPPEIANLEEPFEVIYRDGLVQTMFSNDDDMEPSWALNVKKSIATIFQLDMKNMNFEKSKSFMSEEKSIYGRKLTENVVLVKQNGHATLRKVLVPHSGPNNEKVYDKWKNLDGFQCSSQFQNTMDTPTERTYELIKPGDSIVIGNAKAYGKVTFSPYTEGGFSQYVHVKQEFQLKKQTKMSHDYQPNSGKEHNPTCTYAVFDEKLGTRLSSAGEKGQPKKDNLVQLVHKRLQQLLDTLDEIKIRGIDEKDGFLGKQGDRSHFASFWLMKILGYADYETLKNCFSTVGVGTSYKDETIRELFLDVLSQVGTKASISLLTDLIVSQSLKEDAAVQVLKTIPFYARQIDVSLLEKYESVLGIEYNDQVKRAATLSFATLINRGCKNNKCPAEVLEKYVLKYFELFKDATEYQWQMNYLEGLSNIEVGKVVEYLEPIIKGDQPHSHHIRFLAMWATRLHAIQDPKRVLEVYWPILEDKTQHLELRVGAFVILLLSKPLQDRFNSIATIMAEEPEGSHLYYFFYTTMQSLAGTKHPCYQIMKKPAQNVLQFARPPKEEMWSGNHISDYVDAENHYGGLLQLFMVANPNTGGPNVFYFLHNDHFLGQAYNMFSFYIKIRGIRSPNLEVQAFDGRDKLGKLQQLLSSFNIKEKSEEDEPVHVELIVQFQDRAIMTHYYNETNYQEMFSTLKTMSVGFGSAFHINYQRLLFPVVNEMTGPTDFGVPMALRIPLPFMFSLQGNFTLNVEDQKLVRKVQIDMKYWRTGGAFLAVYNPIGQLWHGVSRLHTTLLHLPMNYFANLDIIRKKVQMAISGLDDSVPGLAIHAGSNVFVEPLLSDESGVSKALLASCPSCISHHPVRGNKHHQKLESEEFELENIGMNFIFSYFDCDVPNIQFYMEDIWRLFEDEASQHISERFDADINILFPLRVYDYFMYFPIPGRCGFVLKTTPAANTKGVVIEAQLIPDDSKNKEKERITSEYSGPEKYQFKGSVLRETSSGELTPAYDYSLSYQMSQDALDHYLKVKFADSENYSERLKMCFDGEVHFPEPPIDPLRQRDPEEEEVTGAVNIVYGPATSNKCPKIGLTLKLAGRAIPVPDKSQPFYAECNAHRNLEEWSHEIAHFSPHTTACVEAAIDSTTLRKFEFTGEGPDFIVDLASKSLYARYVMEGTTPWGEYIVNSSYSKREYPLIKSGNGFAFEFVPDGMLLFDVMEDGDLDRTVFNIYPEAPYGSRFFLDSHDDELLERTCVLTGSSVTTVTENKYSHNMSSCYTLAFGHCHISSPLFAGLVRKIEGTHLMXXKFYNLGHYVEVIPHMNNTAEVIVDGENINFKKEDGYKFKDDDHEIFSIWQRQSKKEKDGPLHLNIQGETTNVLVQYTGGRVIAKFTVSFIGSICGLCNTVDASKPPTRWETCEHQ
>TR203851| white|GO:0016020
ekeasaaatttagaskdggllfidggdeddllgerrspykadwcaqfravfwrswlsmikepilmkvrvlqtllvalllgflffgqelsqegvmningalflfltsmtfqnvfavinvfcselpvfmrehlngmyrtdvyflcktlaevpifivipvvftcvsyyliglnpepsrflyallivslvanvatsfgymisclsknvpmalsigppviipfllfggfflniasvpvyfkwlsylswfkygnealvinqwdgidsilcerdnntcmhsghivletlsfhesdfnldiislcfllvlfrtiafvallirtlgke
>TR217941| scarlet|GO:0005886 GO:0016021 GO:0000166 GO:0042626 GO:0006727 GO:0006856
KGEGNGSGGGGRRKWGRLGGSSSSSSYKRVLNNVSGVVRPGSLVALMGASGAGKSTLMNALAHRSPAGVVIDGDIRVNGRPTGDFMSKLCGYVHQEDIFVGALTVRETLNFMAWLRLDRRTTRSERRRQVSDLISQLGLGKCADTRIGSTGHEKVLSGGEKKRLAFAIEMLTDPPLLFCDEPTTGLDSYSARKLVRIMQMAANGMAWSGRKNSTRTGKTKAILCTIHQPSSEVFALFSQIVLLVEGRVAFNGTATGALAFFSSLGYACPPNFNPADFLIRTLAHQPELGNEMDSSSDQFGQYRRRVKRICDRFAVSDYADEVELLQRYEAHLAASSTEDKEWQAFTTRSTFWAPLWIMQLLWLTHRSFVTVLRDPSVQTIRILQKVAIAIMAGLCYFGVGMGDQRGIQAVQGALFIFVTENTFAPMYSVLAVFPQEMPLFNREYKAGLYNTHAYYLSKMLAMIPGLIVEPFLFVLICYWMIGLRSSTYAFLMTVFISVLTMNVSAACGXFFSTAFDSVAMAMTYLVPFDFVLMATAGLFIKISTIPSVIGWVKYLSWLMYSNEAMSIVQWDGIHNITCEVVDPVNELPCLTEGSDVLDKYSFSVQNLSRNINAMITLYFAFHILGYICLRYRTKKNN
>TR182410| scarlet-like|GO:0005524 GO:0016887
MEMEDPFMSGIGLPPDRLPLIVHEGQEVTESHVASESPIDGLTGGAQPAFTLSWRNISVRVKRKRKESFLSLFPNYENVTILNNVSGLVHSGSLVAIMGASGAGKTTLLATISQRIKAHTTGEILLNGQSVSKEVMRQISGFVPQQDLMVDTLTVEETLNFMSRLKMNPAITETDRKKWIRSLLAELGLNKCINTRLSALSGGERKRMTLAVQLLTDPPLLFCDEPTTGLDSYSAGAVIEKLRQLTTMGKAVICTIHQPASGLFDHFHRVLLLAGGRLAYLGDVADAPNYFKSLGLECPPTYNPAEFYVQQLAVTPGREEQCLRRIEILCDRFALSSLGMALQDELCSISQSSRVDGYVSPFSNDTTDLKSMKHPKIPCMTQLYWLTWRALVDEKRQWSVHAVRLGLFMFVSMVLAFPFMDIKTDQHGVQSRQGLLYLVVTETIFTYAYAVQHTFPQQMPMLLREISDGLYPPGPFYVSKMLILLPKSVLEPIPYAFLIFYVVGLSGGFYGFIFFCIPVIFCATSSTAYGAMLSASFESVSTSSLISVPVDLICITFSGIYIQLSTVPAYLTWIRYVSQFYYANEAISIFQWRLVPEIECSDNPDVPCFRSGDEVLBYYGFSQENLLIDILGLLLIYVVSHLVGFICFYVRSKTQPTY
>TR16501| AP-3 complex subunit delta-1 [putative garnet]|GO:0030123 GO:0015031
EEDPYTAEFIALFRGELNPVAPKAQKKVQVPDGLDLDAWINDPPSESSESEEEDRIGDNLFGPSDLVFKRFASEVSAWGHHPISRNLSKEEMQERREARRLELANNPHYLKGSNKKLNESSVADIPVAPIELTTPLHIAGLASSDKYLDLDRKKKRKGREKKSKRRKKGKRSHEVNNGVSASEEDELSPMHVVNTDIGEMPEGVDPSEGEEEDSRPSDDPHRALDINLDEPLKDEEKLPVAK
>TR151410|c0_g1_i4|m.15879 Molybdenum cofactor sulfurase 1 [putative mal]|GO:0003824
MTNVTIHTFNLAKYFYDTLISTNHYNGKSVAIVYCDTKYENMDTQGNIVNFNLLRANGSYVGYAEVLQLANLNNIHVRTGCFCNSGACQRHLCLNDQELLENFEAGHVCGDTMDLINGKPTGSVRVSFGYMSTKNDADSLLTLIKECFIENDA---ETSESRKDKSWTKPTGVGLESELSQSFCAEQLDEVRIPKDVTTSYVYLKHMYLYPIKSCGAFEVKRWPLGPYGLLHDRQWMVVAANGVCVTQKLAPTLCMIQPTIDLKNALLLLNYPGMQQISVPLCADSITSTSNVTICLSKVCGNKVEVVDCGDAVAEWLTTALQNPSLGELRLHSQYCTSNEIAKIKYNNSSSGQMRVRSLSNQAQFLLINYASVKWLLENVDRSMEDSPLDEEQLISRFRCNFVVSGAKRLSENNWNGVIIGNVAFQSQGPCTRCQIICIDQATGRKTKEPLKTIARLFEGKMKFGIYLSSDDLFQNNQTISVGDLVNCTKTHE
>TR151410|c0_g1_i4|m.15880 molybdenum cofactor sulfurase 3 [putative mal]|GO:0003824
mwsfflsvyfvncecfyrilnyfhnpeeyaviftsgatdalklvvetfdwgggnnipnlpeefgisassepnamdpetqkskqgnavgnfvyfneshtsvigmrevaaangatvksistsqlqkcfslkshsqstseasnslfvypaqcnfsgvkyplkwtelcksgalnccfpgkptnwycfldaatfvstndlnlskvkpdfvcisfykifgyptglgalliknsagnvmkkryfgggsvslslsnkkfhvnkqgfer
>TR106565|c0_g1_i1|m.7775 tyrosine 3-monooxygenase [putative pale]|GO:0004511 GO:0005506 GO:0042423 GO:0055114 GO:0006570
mmavaaqknremfaikksysiengyparrrslvddarfetlvvkqtkqsvleearqrcndssaesyvipndeeqavcpstdevftgeveaglvngdahkdapasekddteqadedmdshaaegqenesdegmteeeaflakviqdgseaekdqvqwaalvlrlrdginslarilktienlkgtathvesrpsktegvqydvlvrvqmprscllnllrslrqssslagvslladptpapaagstvtvkdpwfpkhasdldhcnhlmtkyepeldmnhpgfadkvyrerrrviaaiafdykygqpipcidytetetatwtgvfrqvldlmpkhacsqfrdvfallmkegifredripqledmssflkkhtgftlrpaaglltardflaslafrvfqstqyvrhksspyhtpepdcihellghmplladpsfaqfsqeiglaslgasdaeieklstvywftvefglckeggavkaygagllssygellhalsdkpehrsfepastavqpyqdqeyqpvyyvadsfedakekfrrwvstcmsrpfevrfnphterveildsvdsleclisqmnlemlhlnnalkklkfgc
>TR15147|c1_g1_i1|m.1348 amidophosphoribosyltransferase-like [Prat]|GO:0004044 GO:0046872 GO:0051536 GO:0006189 GO:0009113 GO:0009116 GO:0006536 GO:0006541
meadpccsqswkwervcckkvsqqeeahqdrnccemkpalenatsdesltlpepptglthecgvfgcvsagewptqidvpqiiclglvalqhrgqesagiv
>TR177287| xanthine dehydrogenase [Rosy]|GO:0005506 GO:0016614 GO:0043546 GO:0050660 GO:0055114
PGIVMSMYSLLRACSTEGGDSRGRKPTMKDMEVAFQGNLCRCTGYRPIIEGFRTLTEEWEQCSSRLPAVNGMSNGYGKGLSNGCCRVNGDINAGGCCKANGEVNGCCSGGQMASGDVEILFDTSSFKPYDSSQEPIFPPELQLSPVLDNQYLIVKGPRVTWHRPTTLEQLLILKRDHPQARIIVGNTEVGVEVKFKNFVYPVLIHPTQVKELLQIEHTGAGIKFGSSVTLNQINTVLKNEIDKLPEYRTRVFTAVVDMLHWFAGKQIRNVAAVGGNIMTGSPISDLNPVFIAANCMLELVSKGGGHRTVTMNGSFFTSYRKNIVKPDEILLSIIIPFSHEGMFFKAYKQARRRDDDIAVVNAAFNIEFEKGTSLIVQKATLAYGGMAPTTVEARKTAQVLKGKKWDMRLLEEVCNALVEELPLSPDAPGGMIAYRRSLTLSFFYKFFVEIYGKLNSNGTQKESLPERDLSASQGLVNLHPQSSQYFQVVPPDQPKLDPVGRPIPHLSAFKQATGEAVYCDDIPHYEHELYLSPVLTTRAHARIIKVDATDALAVDGVHAFISAADMDPKRNSFGPIVHDEEIFVTSTVNSTGQVIGAIVAVDQLTAQRAAKMVKVEYQDLSPIIVTIQDAVARESFHKGTHRLMKNGDVDAAMKSSAHVVEGEIHMGGQEHFYLETHATIAIPREDGNELEVISSTQHPSEVQKLLSEATGMPANRIVCRVKRIGGGFGGKESRGALLALPVAIAALKLNRPVRCMLDRDEDMVASGGRHPFYGKYTIGFSKEGKLLACDLQFYNNAGHSLDLSTSVLERAMFHFQNAYKIPNIRCKAACCKTNLPSNTAFRGFGGPQGMFFVENMISDICAFLNVDSAKVREMNLYVEGDKTHYNQVLEHCTLKRCWSECMQRSAYEQRRQEVNDFNRQHRWRKRGLSIIPTMFGIAFTAKFLNQAGALVMVYTDGSVLLTHSGIEMGQGLHTKMVQVASRVFGIPESKIYISETSTDKVPNTSATAASSGSDLNGMAVMHACQTIMERLKPFIDANPKGKWEEWVSAAYFERVSLSTTGFYRTSDIGYNWETNSGNPFNYFTYGVACSEVEIDCLTGDHQVLSTDIVMDLGESLNPAIDVGQVEGAFIQGYGLYTLEELTYSPTGILYSRGPGAYKLPGFADIPARFNVSLLRGAKNPRAVYSSKAVGEPPLFLASSVFFAIKDAISSARSEVGLKGPFRLDSPATSARIRMACQDDFTKKISLNKDVMPWNVVP
>TR202403|c1_g1_i1|m.60056 xanthine dehydrogenase [Rosy]|GO:0016491 GO:0043546 GO:0055114
dldparnhfgpvikdeeifvsstvystgqiigavvaidqdtaqqasklvnvvyedlhpvivsiqdaithesfhngtdrsitdgdvkaamnmcahilhgeahmggqehfyletnctiaipkeghelevicssqnlaeiqkliseavgmsashivcrvkrlgggfggkesrasivalpvaiaalklnrpvrcmldrdedmiatggrnpfhgkykmgfssegevlayelhvynnaghsldlscsvlerslfhclncyniknvkckgaccktnlpsntafrgfgtpqgmffmenaitdmanilgidpavirekmlfqegdkthyncvleyctlkrcweeclkrskymqrreeihafnrehrwrkrglcilptmygiaftipflnqtsalvmvytdgsvllthggtemgqglhtkmiqvasrvlgipediiyisetstdkipngpptaassgsdlngmavmyacqklkkrlkpyisanpegkwkdwvnaaylnrvslsatgfyrtpgvgynwkthagkpynyftygvacseveidcltgdhqvlstdivmdlgeslnpaidigqvegafmqgyglftleeltyspngvlysrgpgaykipgfsniptkfnvsllrgspnpravysskavgepplalamsvffaikdaitsarnevglsgpfrldspattarirmacedhftkkvmtednvmpwnivp
>TR155117| tryptophan 2,3-dioxygenase [putative vermillion]|GO:0004833 GO:0020037 GO:0019441
AVEAEEGQQQQHQRRRPKKRPVHDEHLFIITHQAYELWFKQIIYELDSIRALMNSEDMDESQTLEILKRLHRIVLILKLLVDQVMILETMTPLDFMDFRNYLSPASGFQSLQFRLLENKLGVRQEHRVKYNQNYRRVFGNDEAAIAAIEKSESEPSMVELVQRWLERTPGLQVEGFDFWGKYRRAVGALLHQHQVKAKNAPTEAARTHQLADVERRRAVFDSVFDEAAHEALVARGERRFSHRALQGAIMITFYRDEPRFSQPHQMLTLLMDIDSLITKWRYNHVIMVQRMIGSQHLGTGGSSGYQYLRSTLSDRYKVFLDLFNLSTFLIPRSHIPPLSKGMKNTLSMRDEELFDLPTTELNPTSCPFKGNKQTKDIKEKANGSSN
